# Supplementary material
Source: publisher figshare collection journal article supplement (https://acs.figshare.com/ndownloader/files/4571719)

Supporting Information for

**Highly Enantioselective Hydrogenation of Enamides Catalyzed by**

**Chiral Phosphoric Acids**

Guilong Li and Jon C. Antilla\*

*Department of Chemistry, University of South Florida,*  
*4202 East Fowler Avenue CHE205A, Tampa, Florida 33620*

[jantilla@cas.usf.edu](mailto:jantilla@cas.usf.edu)

|                                     |       |
|-------------------------------------|-------|
| General Considerations .....        | S2    |
| Experimental section .....          | S3    |
| Compound Characterization data..... | S3-S7 |
| References .....                    | S7    |
| Spectra Copies of chiral HPLC.....  | S8-37 |

**General Considerations:** All reactions were carried out in flame-dried or oven-dried screw-cap test tubes with magnetic stirring. All solvents (toluene, dichloromethane, and THF) were purified by passing through a column of activated alumina under a dry argon atmosphere. Ethyl acetate was purchased from Aldrich and dried with molecular sieves (4Å). Additional solvents (acetonitrile and chloroform) were purchased anhydrous from commercial sources and transferred under an argon atmosphere. VAPOL phosphoric acid was synthesized according to the literature procedure.<sup>1</sup> Chiral BINOL was purchased from commercial sources and used without further purification. Substituted BINOL phosphoric acids (**A3**, and **A4**) were prepared from chiral BINOL according to the known literature procedures.<sup>2</sup> Phenylphosphinic acid was purchased from commercial sources and used without further purification. Thin layer chromatography was performed on Merck TLC plates (silica gel 60 F254). Flash column chromatography was performed with Merck silica gel (230-400 mesh). Enantiomeric excess (ee) was determined using a Varian Prostar HPLC with a 210 binary pump and a 335 diode array detector. Column conditions are reported in the experimental section below. Melting points were determined using a MEL-TEMP 3.0 instrument and are uncorrected. Optical rotations were performed on a Rudolph Research Analytical Autopol IV polarimeter ( $\lambda$  589) using a 700- L cell with a path length of 1-dm. <sup>1</sup>H NMR and <sup>13</sup>C NMR were recorded on a Bruker Avance DPX-250 (250 MHz) instrument with chemical shifts reported relative to tetramethylsilane (TMS). Compounds described in the literature were characterized by comparing their <sup>1</sup>H NMR, <sup>13</sup>C NMR chemical shift and melting points to the reported values.

All enamides were prepared according to the reported procedures except that the purification of the enamides was by flash column chromatography (EtOAc / hexane) and followed by recrystallization from EtOAc/hexane.<sup>3</sup>

All racemic amide products were prepared by hydrogenation of the corresponding enamide with 10% Pd/C as the catalyst and by using EtOAc as the solvent.

**Typical procedure for the asymmetric hydrogenation of enamide catalyzed by a dual-catalytic system of a chiral Brønsted acid and acetic acid (Method B):** To a flame-dried reaction tube was added enamide **1** (0.2 mmol), Hantzsch ester **2** (55.7 mg, 0.22 mmol) and catalyst **A4** (1.4 mg, 0.002 mmol). The mixture was purged with argon, then acetic acid (1.0  $\mu$ L, 0.02 mmol) and toluene (1.2 mL) were added. The suspension was heated to 50°C with stirring. The crude product was purified by flash column chromatography (EtOAc/hexane) after the reaction was completed (monitored by TLC) to provide pure product amide **3**. ee values were measured on HPLC with a suitable chiral column.

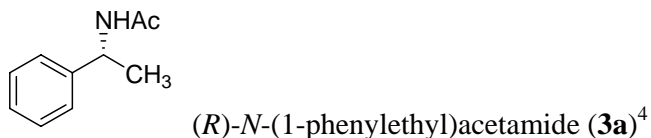

The product was obtained by flash chromatography (hexane: EtOAc = 1:1 to EtOAc) as a white solid, 31.4 mg, 97% yield, 91% ee. HPLC analysis: Chiralcel AD-H (hexane/iPrOH = 95/5, 1.0 mL/min),  $t_{r-major}$  9.12 min,  $t_{r-minor}$  11.60 min. Melting point: 89-91 °C.  $[\alpha]_D^{20}$  = 109.3 ( $c$  = 1.49, EtOH). <sup>1</sup>H NMR (250MHz, CDCl<sub>3</sub>):  $\delta$  1.46 (d,  $J$ =6.8 Hz, 3H), 1.94 (s, 3H), 5.04-5.15 (m, 1H), 6.09 (br, 1H), 7.27-7.30 (m, 5H). <sup>13</sup>C NMR (62.5 MHz, CDCl<sub>3</sub>):  $\delta$  21.8, 23.4, 48.8, 126.2, 127.3, 128.7, 143.3, 169.2.

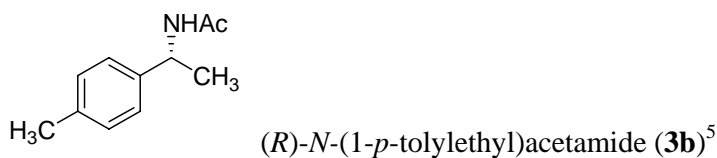

This reaction was performed in 0.1 mmol scale. The product was obtained by flash

chromatography (hexane: EtOAc = 1:1 to EtOAc) as a white solid, 16.5 mg, 93% yield, 90% ee. HPLC analysis: Chiralcel AD-H (hexane/iPrOH = 95/5, 1.0 mL/min),  $t_{\text{r-major}}$  9.99 min,  $t_{\text{r-minor}}$  13.03 min. Melting point: 80-82°C.  $[\alpha]_{\text{D}}^{20} = +135.7$  (c = 0.715, EtOH).  $^1\text{H}$  NMR (250 MHz,  $\text{CDCl}_3$ ):  $\delta$  1.46 (d,  $J$  = 6.8 Hz, 3H), 1.96 (s, 3H), 2.32 (s, 3H), 5.03-5.14 (m, 1H), 5.78 (br, 1H), 7.17 (dd,  $J$  = 7.8, 9.0 Hz, 4H).  $^{13}\text{C}$  NMR (62.5 MHz,  $\text{CDCl}_3$ ):  $\delta$  21.1, 21.7, 23.5, 48.6, 126.2, 129.3, 137.1, 140.2, 169.0.

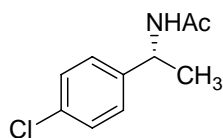

(*R*)-*N*-(1-(4-chlorophenyl)ethyl)acetamide (**3c**)<sup>6</sup>

The product was obtained by flash chromatography (hexane: EtOAc = 1:1 to EtOAc) as a white solid, 34.6 mg, 88% yield, 91% ee. HPLC analysis: Chiralcel AD-H (hexane/iPrOH = 95/5, 1.0 mL/min),  $t_{\text{r-major}}$  10.71 min,  $t_{\text{r-minor}}$  14.21 min. Melting point: 97-99 °C.  $[\alpha]_{\text{D}}^{20} = +122.3$  (c = 1.38, EtOH).  $^1\text{H}$  NMR (250 MHz,  $\text{CDCl}_3$ ):  $\delta$  1.43 (d,  $J$  = 6.8 Hz, 3H), 1.95 (s, 3H), 4.99-5.11 (m, 1H), 6.02 (br, 1H), 7.25 (dd,  $J$  = 8.8, 6.8 Hz, 4H).  $^{13}\text{C}$  NMR (62.5 MHz,  $\text{CDCl}_3$ ):  $\delta$  21.7, 23.3, 48.2, 127.6, 128.7, 133.0, 141.9, 169.2.

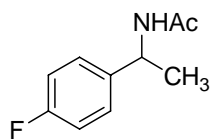

*N*-(1-(4-fluorophenyl)ethyl)acetamide (**3d**)<sup>7</sup>

The product was obtained by flash chromatography (hexane: EtOAc = 1:1 to EtOAc) as a white solid, 34.9 mg, 96% yield, 89% ee. HPLC analysis: Chiralcel AD-H (hexane/iPrOH = 95/5, 1.0 mL/min),  $t_{\text{r-major}}$  9.88 min,  $t_{\text{r-minor}}$  12.65 min. Melting point: 118-120 °C.  $[\alpha]_{\text{D}}^{20} = +105.2$  (c = 1.60, EtOH).  $^1\text{H}$  NMR (250 MHz,  $\text{CDCl}_3$ ):  $\delta$  1.44 (d,  $J$  = 7.0 Hz, 3H), 1.95 (s, 3H), 5.01-5.13 (m, 1H), 6.11 (br, 1H), 6.99 (t,  $J$  = 8.6, 2H), 7.24-7.29 (m, 2H).  $^{13}\text{C}$  NMR (62.5 MHz,  $\text{CDCl}_3$ ):  $\delta$  21.8, 23.3, 48.2, 115.3 (d,  $J$  = 21.3 Hz), 127.8 (d,  $J$  = 8.0 Hz), 139.2 (d,  $J$  = 3.1 Hz), 161.9 (d,  $J$  = 243.8 Hz), 169.2.

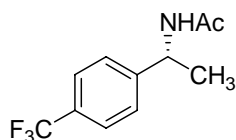

(*R*)-*N*-(1-(4-(trifluoromethyl)phenyl)ethyl)acetamide (**3e**)<sup>5</sup>

The product was obtained by flash chromatography (hexane: EtOAc = 1:1 to EtOAc) as a white solid, 44.3 mg, 96% yield, 87% ee. Melting point: 101-102 °C. HPLC analysis: Chiralcel AD-H (hexane/iPrOH = 95/5, 1.0 mL/min),  $t_{r\text{-major}}$  8.71 min,  $t_{r\text{-minor}}$  11.63 min.  $[\alpha]_D^{20} = +85.8$  ( $c = 1.62$ , EtOH).  $^1\text{H}$  NMR (250 MHz,  $\text{CDCl}_3$ ):  $\delta$  1.44(d,  $J = 7.0$  Hz, 3H), 1.96 (s, 3H), 5.05-5.16 (m, 1H), 6.18 (br, 1H), 7.34 (d,  $J = 8.0$ , 2H), 7.56(d,  $J = 8.0$ , 2H).  $^{13}\text{C}$  NMR (62.5 MHz,  $\text{CDCl}_3$ ):  $\delta$  21.8, 23.2, 48.6, 124.1 (d,  $J = 270.3$  Hz), 125.6 (q,  $J = 4.0$  Hz), 126.4, 129.5 (d,  $J = 32.1$ Hz), 147.5, 169.4.

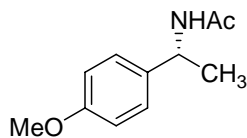

(*R*)-*N*-(1-(4-methoxyphenyl)ethyl)acetamide (**3f**)<sup>5</sup>

No cocatalyst acetic acid was used in this case. The product was obtained by flash chromatography (hexane: EtOAc = 1:1 to EtOAc) as a white solid, 37.1 mg, 96% yield, 95% ee. Melting point: 84-85 °C. HPLC analysis: Chiralcel AD-H (hexane/iPrOH = 95/5, 1.0 mL/min),  $t_{r\text{-minor}}$  16.48 min,  $t_{r\text{-major}}$  18.64 min.  $[\alpha]_D^{20} = +140.9$  ( $c = 1.475$ , EtOH).  $^1\text{H}$  NMR (250 MHz,  $\text{CDCl}_3$ ):  $\delta$  1.45(d,  $J = 7.0$  Hz, 3H), 1.94 (s, 3H), 3.78(s, 3H), 4.99-5.11(m, 1H), 5.93 (br, 1H), 6.85(d,  $J = 8.8$ , Hz, 2H), 7.23(d,  $J = 8.8$ , Hz, 2H).  $^{13}\text{C}$  NMR (62.5 MHz,  $\text{CDCl}_3$ ):  $\delta$  21.7, 23.4, 48.2, 114.0, 127.4, 135.4, 158.8, 169.1.

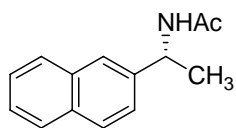

(*R*)-*N*-(1-(naphthalen-2-yl)ethyl)acetamide (**3g**)<sup>8</sup>

The product was obtained by flash chromatography (hexane: EtOAc = 1:1 to EtOAc) as a white solid, 43.0 mg, 99% yield, 92% ee. Melting point: 108-109 °C. HPLC analysis: Chiralcel AD-H (hexane/iPrOH = 95/5, 1.0 mL/min),  $t_{r\text{-major}}$  13.12 min,  $t_{r\text{-minor}}$  19.56 min.  $[\alpha]_D^{20} = +102.0$  ( $c = 1.97$ , EtOH).  $^1\text{H}$  NMR (250 MHz,  $\text{CDCl}_3$ ):  $\delta$  1.54(d,  $J = 7.0$  Hz, 3H), 1.97 (s, 3H), 5.21-5.32 (m, 1H), 6.21 (d,  $J = 6.5$  Hz, 1H),

7.40-7.48 (m, 3H), 7.73-7.81 (m, 4H).  $^{13}\text{C}$  NMR (62.5 MHz,  $\text{CDCl}_3$ ):  $\delta$  21.7, 23.4, 48.9, 124.6, 124.8, 125.9, 126.3, 127.6, 127.9, 128.5, 132.7, 133.4, 140.7, 169.3.

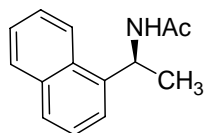

(*S*)-*N*-(1-(naphthalen-1-yl)ethyl)acetamide (**3h**)<sup>5,9</sup>

The product was obtained by flash chromatography (hexane: EtOAc = 1:1 to EtOAc) as a white solid, 18.2 mg, 43% yield, 78% ee. Melting point: 147-149 °C. HPLC analysis: Chiralcel AS-H (hexane/iPrOH = 95/5, 1.0 mL/min),  $t_{\text{r-major}}$  29.43 min,  $t_{\text{r-minor}}$  36.89 min.  $[\alpha]_{\text{D}}^{20} = -47.9$  ( $c = 0.82$ , EtOH).  $^1\text{H}$  NMR (250 MHz,  $\text{CDCl}_3$ ):  $\delta$  1.66 (d,  $J = 6.5$  Hz, 3H), 1.94 (s, 3H), 5.83-5.94 (m, 2H), 7.44-7.55 (m, 4H), 7.78-8.12 (m, 3H).  $^{13}\text{C}$  NMR (62.5 MHz,  $\text{CDCl}_3$ ):  $\delta$  20.7, 23.4, 44.7, 122.6, 123.5, 125.2, 125.9, 126.6, 128.4, 128.8, 131.2, 134.0, 138.3, 168.9.

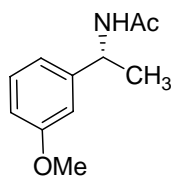

(*R*)-*N*-(1-(3-methoxyphenyl)ethyl)acetamide (**3i**)<sup>10</sup>

The product was obtained by flash chromatography (hexane: EtOAc = 1:1 to EtOAc) as an oil, 38.0 mg, 98% yield, 71% ee. HPLC analysis: Chiralcel AD-H (hexane/iPrOH = 95/5, 1.0 mL/min),  $t_{\text{r-major}}$  13.40 min,  $t_{\text{r-minor}}$  16.69 min.  $[\alpha]_{\text{D}}^{20} = +93.8$  ( $c = 1.58$ , EtOH).  $^1\text{H}$  NMR (250 MHz,  $\text{CDCl}_3$ ):  $\delta$  1.44 (d,  $J = 7.0$  Hz, 3H), 1.94 (s, 3H), 3.78 (s, 3H), 5.00-5.11 (m, 1H), 6.09 (br, 1H), 6.76-6.89 (m, 3H), 7.23 (t,  $J = 7.8$  Hz, 1H).  $^{13}\text{C}$  NMR (62.5 MHz,  $\text{CDCl}_3$ ):  $\delta$  21.8, 23.4, 55.2, 112.3, 112.4, 118.4, 129.7, 145.0, 159.8, 169.2.

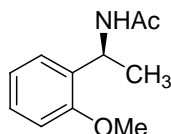

(*S*)-*N*-(1-(2-methoxyphenyl)ethyl)acetamide (**3j**)<sup>10b</sup>

The product was obtained by flash chromatography (hexane: EtOAc = 1:1 to EtOAc) as a white solid, 36.9 mg, 96% yield, 41% ee. HPLC analysis: Chiralcel AD-H

(hexane/iPrOH = 95/5, 1.0 mL/min),  $t_{\text{r-minor}}$  11.97 min,  $t_{\text{r-major}}$  16.69 min. Melting point: 142-144 °C.  $[\alpha]_{\text{D}}^{20} = -38.3$  ( $c = 1.69$ , EtOH).  $^1\text{H}$  NMR (250 MHz,  $\text{CDCl}_3$ ):  $\delta$  1.41(d,  $J = 7.0$  Hz, 3H), 1.95 (s, 3H), 3.86 (s, 3H), 5.20-5.32 (m, 1H), 6.50 (d,  $J = 6.8$  Hz, 1H), 6.90 (t,  $J = 7.5$  Hz, 2H), 7.19-7.25 (m, 2H).  $^{13}\text{C}$  NMR (62.5 MHz,  $\text{CDCl}_3$ ):  $\delta$  21.5, 23.6, 55.4, 111.1, 120.9, 128.0, 128.4, 131.0, 157.0, 168.8.

#### References:

1. (a) Bao J.; Wulff, W. D.; Dominy, J. B.; Fumo, M. J.; Grant, E. B.; Rob, A. C.; Whitcomb, M. C.; Yeung, S.-M.; Ostrander, R. L.; Rheingold, A. L. *J. Am. Chem. Soc.* **1996**, *118*, 3392. (b) Rowland, G. B.; Zhang, H.; Rowland, E. B.; Chennamadhavuni, S.; Wang, Y.; Antilla, J. C. *J. Am. Chem. Soc.* **2005**, *127*, 15696.
2. For procedures, see: (a) Storer, R. I.; Carrera, D. E.; Ni, Y.; MacMillan, D. W. C. *J. Am. Chem. Soc.* **2006**, *128*, 84. For characterization data, see: (b) Inanaga, J. EP 1134209 A1, **2001**, 16 pp. (c) Toh, J.; Fuchibe, K.; Akiyama, T. *Angew. Chem., Int. Ed.* **2006**, *45*, 4796.
3. Burk, M. J.; Casy, G.; Johnson, N. B. *J. Org. Chem.* **1998**, *63*, 6084.
4. Zhao, D.; Wang, Z.; Ding, K. *Tetrahedron Lett.* **2007**, *48*, 5095.
5. Kim, M.-J.; Kim, W.-H.; Han, K.; Choi, Y. K.; Park, *Org. Lett.* **2007**, *9*, 1157.
6. Zhang, Q.; Takacs, J. M. *Org. Lett.* **2008**, *10*, 545.
7. Hu, X.-P.; Zheng, Z. *Org. Lett.* **2004**, *6*, 3585.
8. (a) Paetzold, J.; Baeckvall, J. E. *J. Am. Chem. Soc.* **2005**, *127*, 17620. (b) Hansen, A.L.; Skrydstrup, T. *J. Org. Chem.* **2005**, *70*, 5997.
9. Hamersak, Z.; Roje, M.; Hollosi, M.; Majer, Z.; Sunjic, V. *Spectroscopy Letters*, **2002**, *35*, 73.
10. (a) Sanz, R.; Martinez, A.; Guilarte, V.; Alvarez-Gutierrez, J. M.; Rodriguez, F. *Eur. J. Org. Chem.* **2007**, *28*, 4642. (b) Horiba, M.; Yamamoto, S.; Oi, N.; *Agricultural and Biological Chemistry*, **1982**, *46*, 1219.

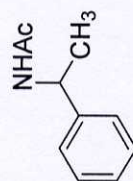

Chemical Formula:  $C_{10}H_{13}NO$   
 Exact Mass: 163.0997  
 Molecular Weight: 163.2163

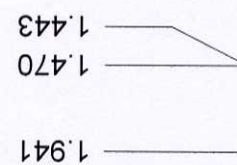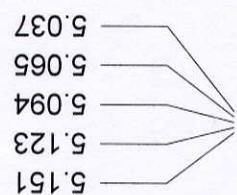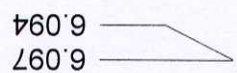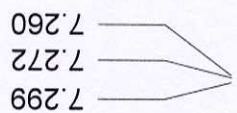

Product 3a

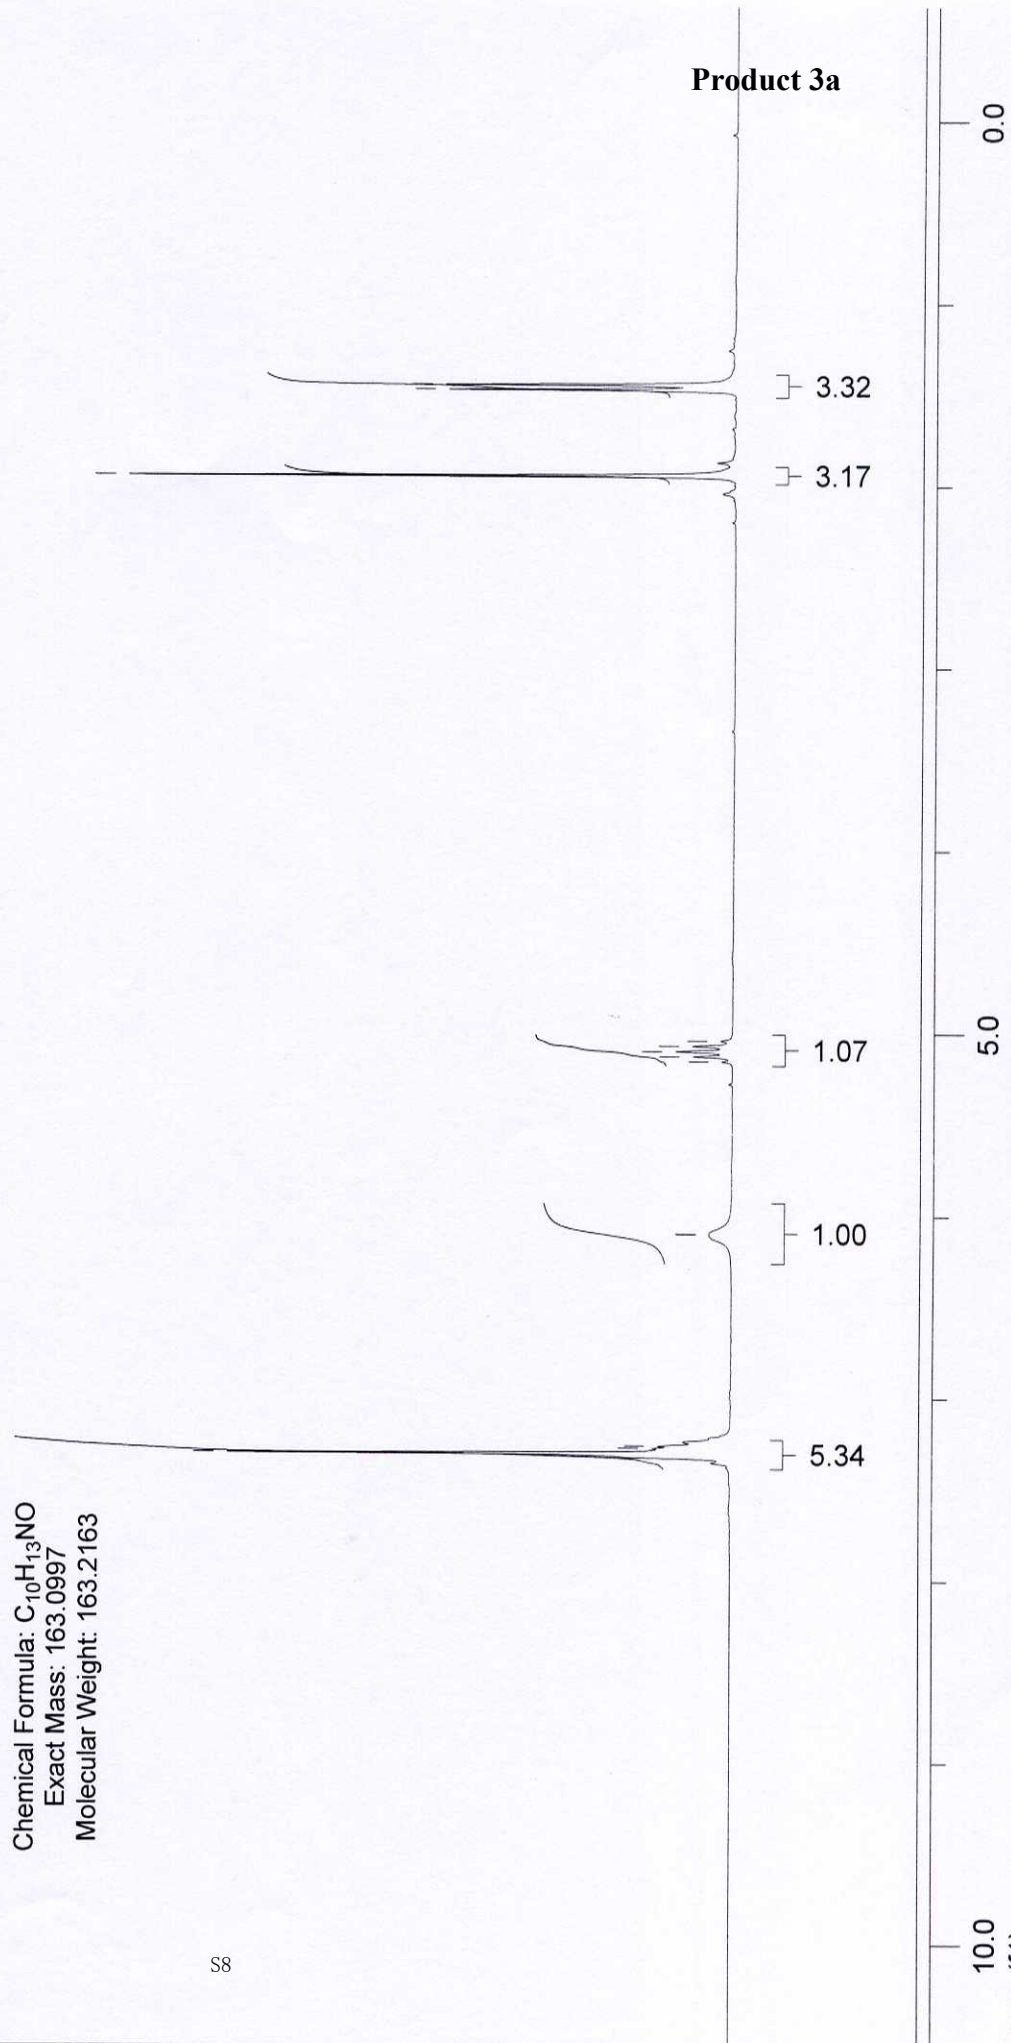



Product 3a

Chemical Formula:  $C_{10}H_{13}NO$   
 Exact Mass: 163.0997  
 Molecular Weight: 163.2163

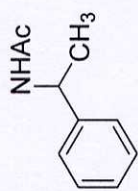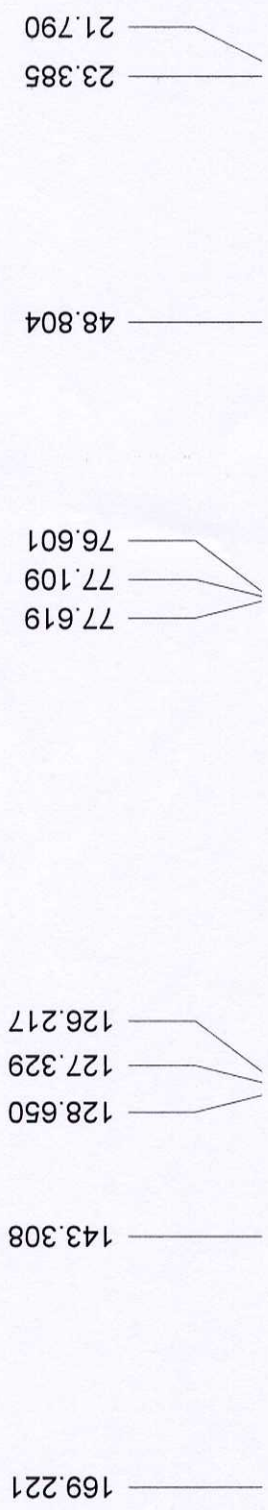

# Chromatogram : LGL3-150(AD95051)-21\_channel1

Product 3a

System : HPLC  
Method : LGL  
User : Gerald Rowland

Acquired : 11/13/2008 10:33:03 AM  
Processed : 11/13/2008 4:14:15 PM  
Printed : 11/13/2008 4:15:03 PM

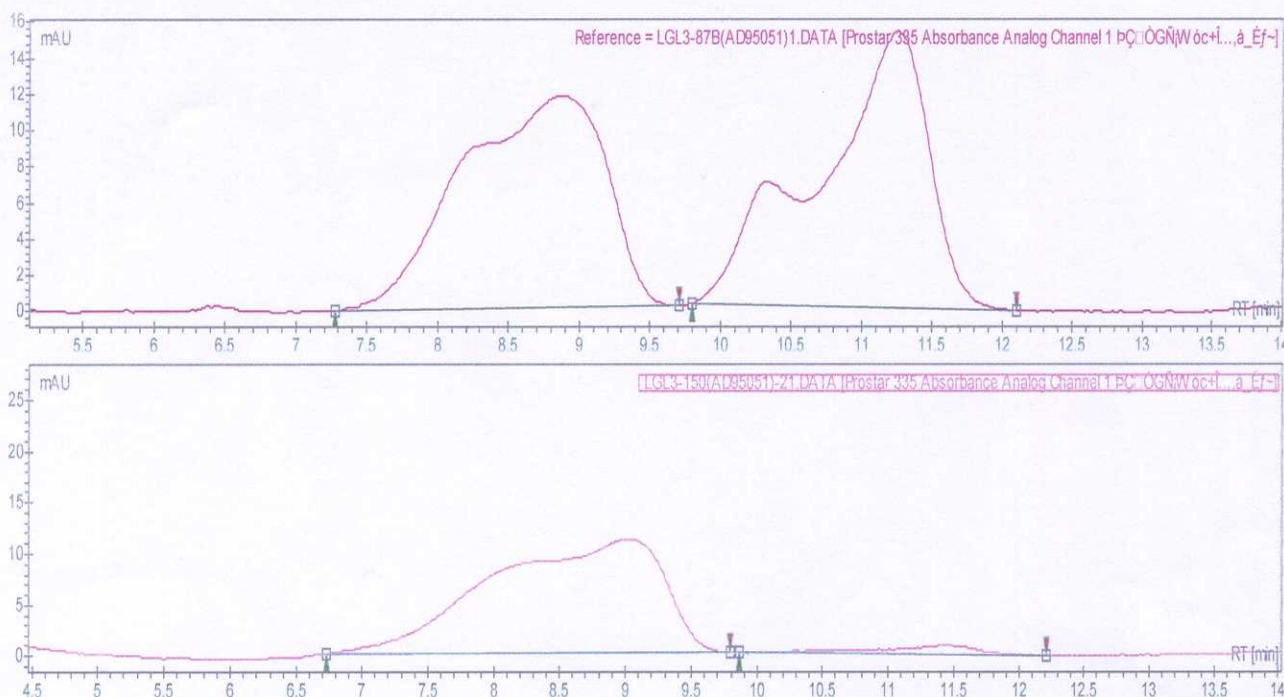

## Peak results :

LGL3-87B(AD95051)1.D [Prostar 335 Absorbance Analog Channel 1] CC(C)C(=O)Nc1ccccc1

| Index | Name    | Time [Min] | Quantity [% Area] | Height [mAU] | Area [mAU.Min] | Area % [%] |
|-------|---------|------------|-------------------|--------------|----------------|------------|
| 1     | UNKNOWN | 8.88       | 50.13             | 11.7         | 13.9           | 50.130     |
| 2     | UNKNOWN | 11.25      | 49.87             | 15.3         | 13.8           | 49.870     |
| Total |         |            | 100.00            | 27.0         | 27.7           | 100.000    |

LGL3-150(AD95051)-21.D [Prostar 335 Absorbance Analog Channel 1] CC(C)C(=O)Nc1ccccc1

| Index | Name    | Time [Min] | Quantity [% Area] | Height [mAU] | Area [mAU.Min] | Area % [%] |
|-------|---------|------------|-------------------|--------------|----------------|------------|
| 1     | UNKNOWN | 9.03       | 95.44             | 11.1         | 16.8           | 95.442     |
| 2     | UNKNOWN | 11.47      | 4.56              | 0.9          | 0.8            | 4.558      |
| Total |         |            | 100.00            | 12.0         | 17.6           | 100.000    |

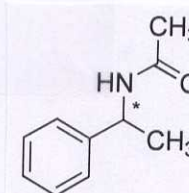

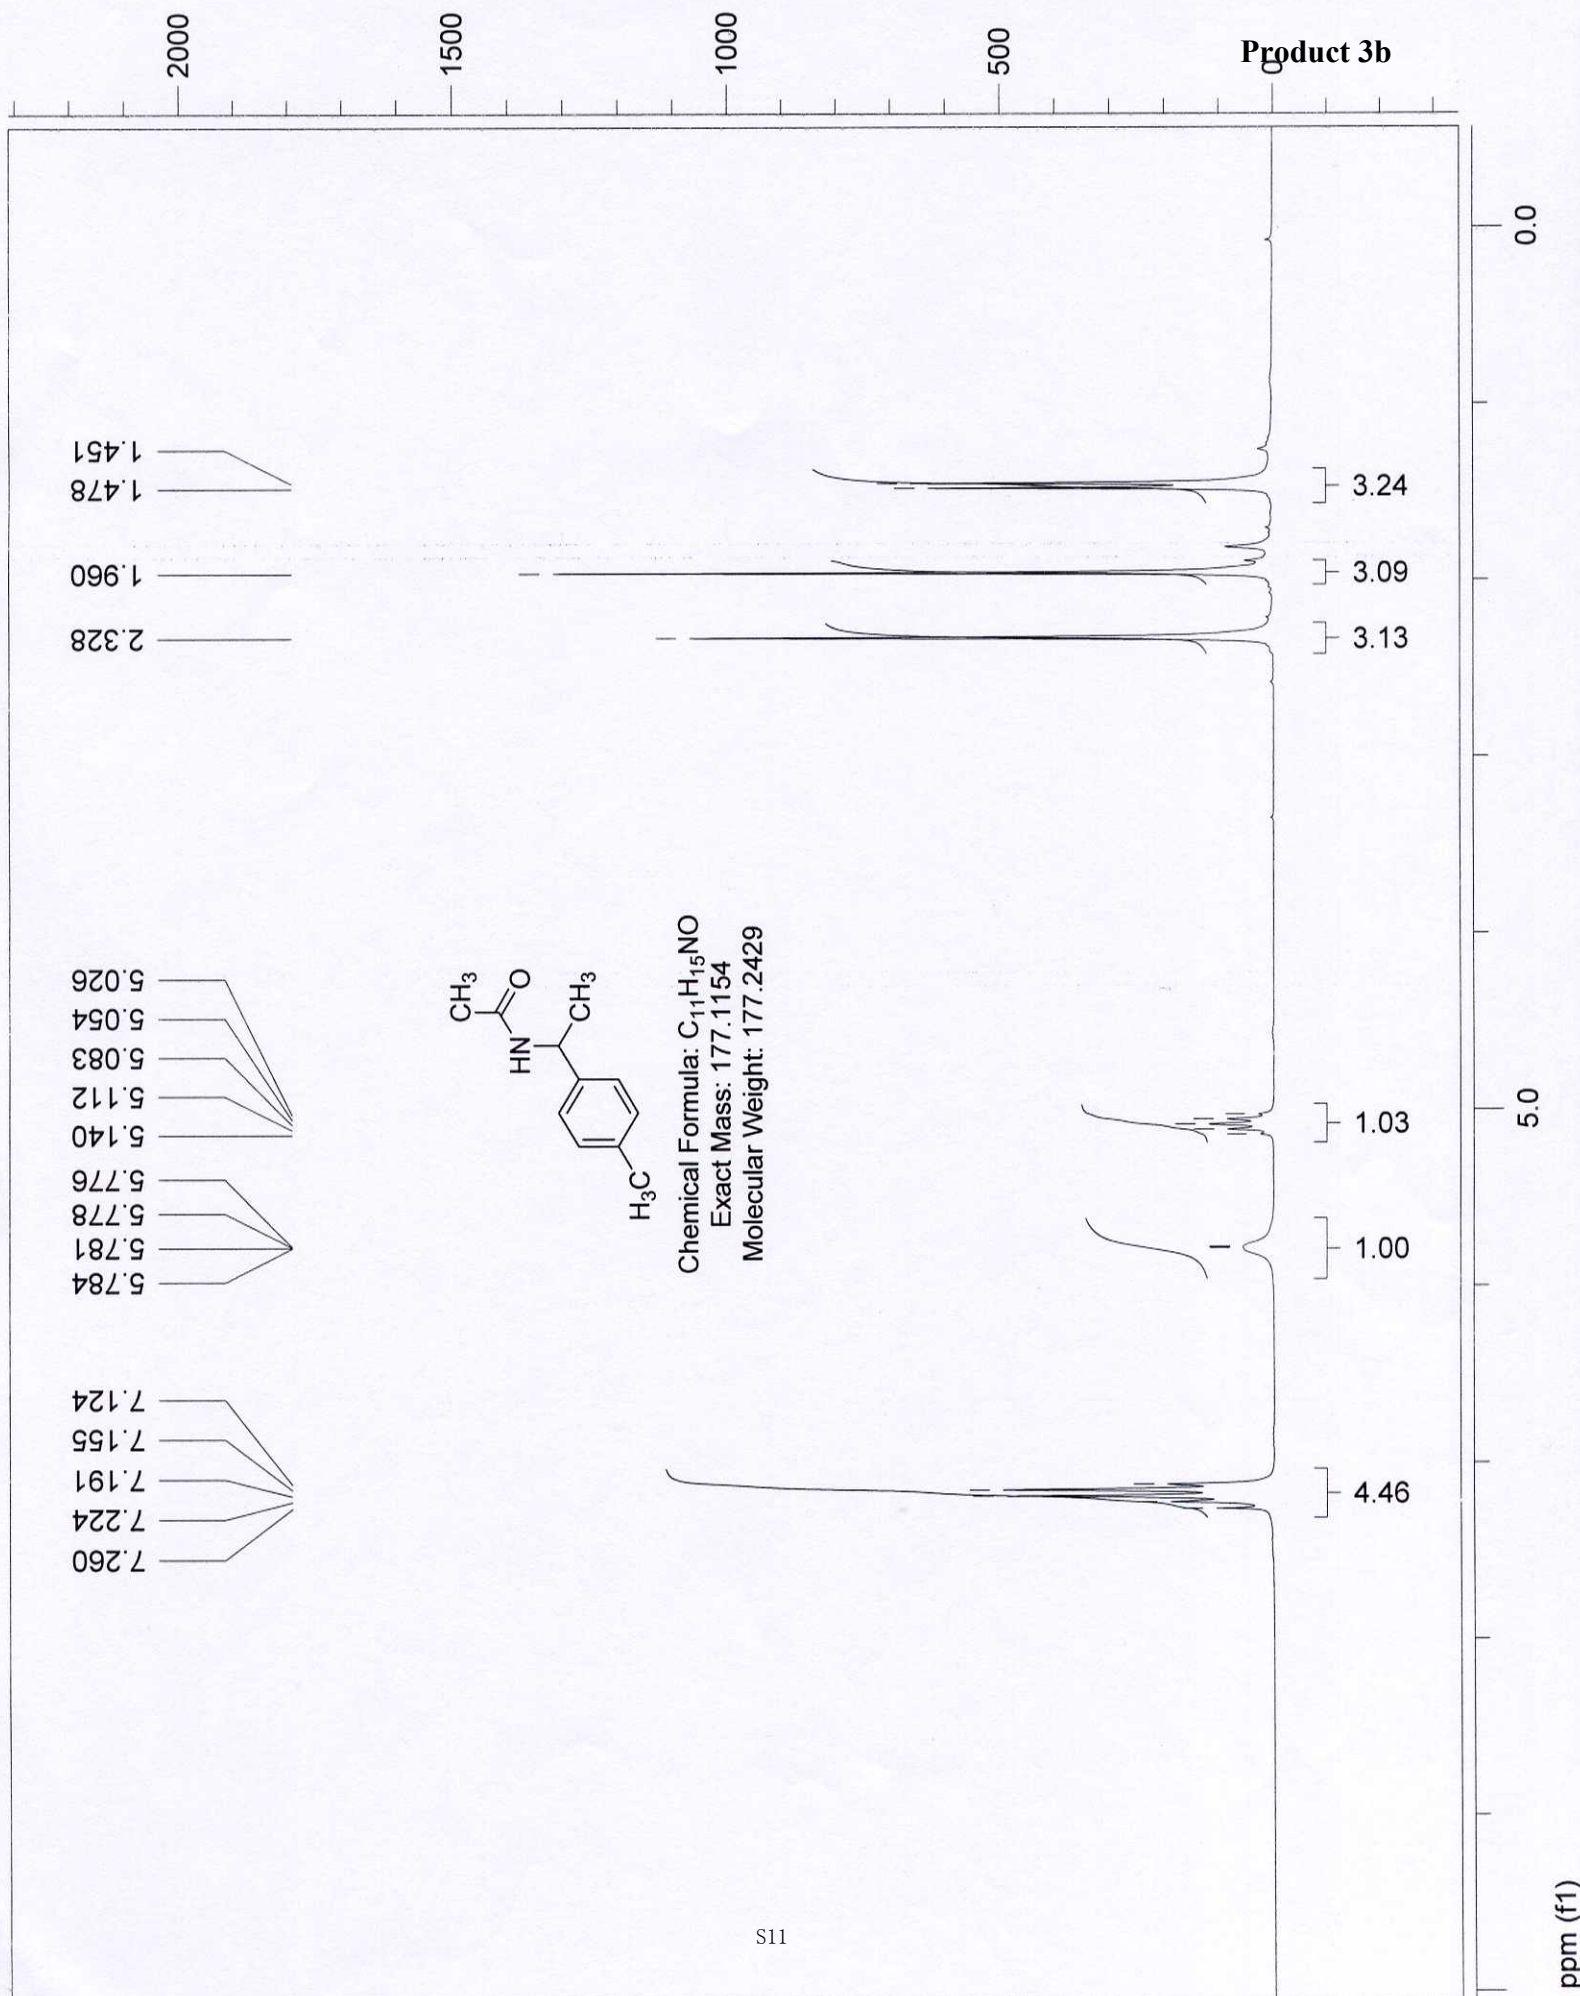



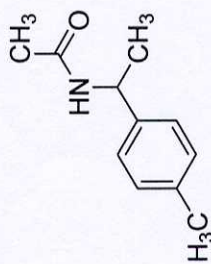

Chemical Formula: C<sub>11</sub>H<sub>15</sub>NO  
 Exact Mass: 177.1154  
 Molecular Weight: 177.2429

S12

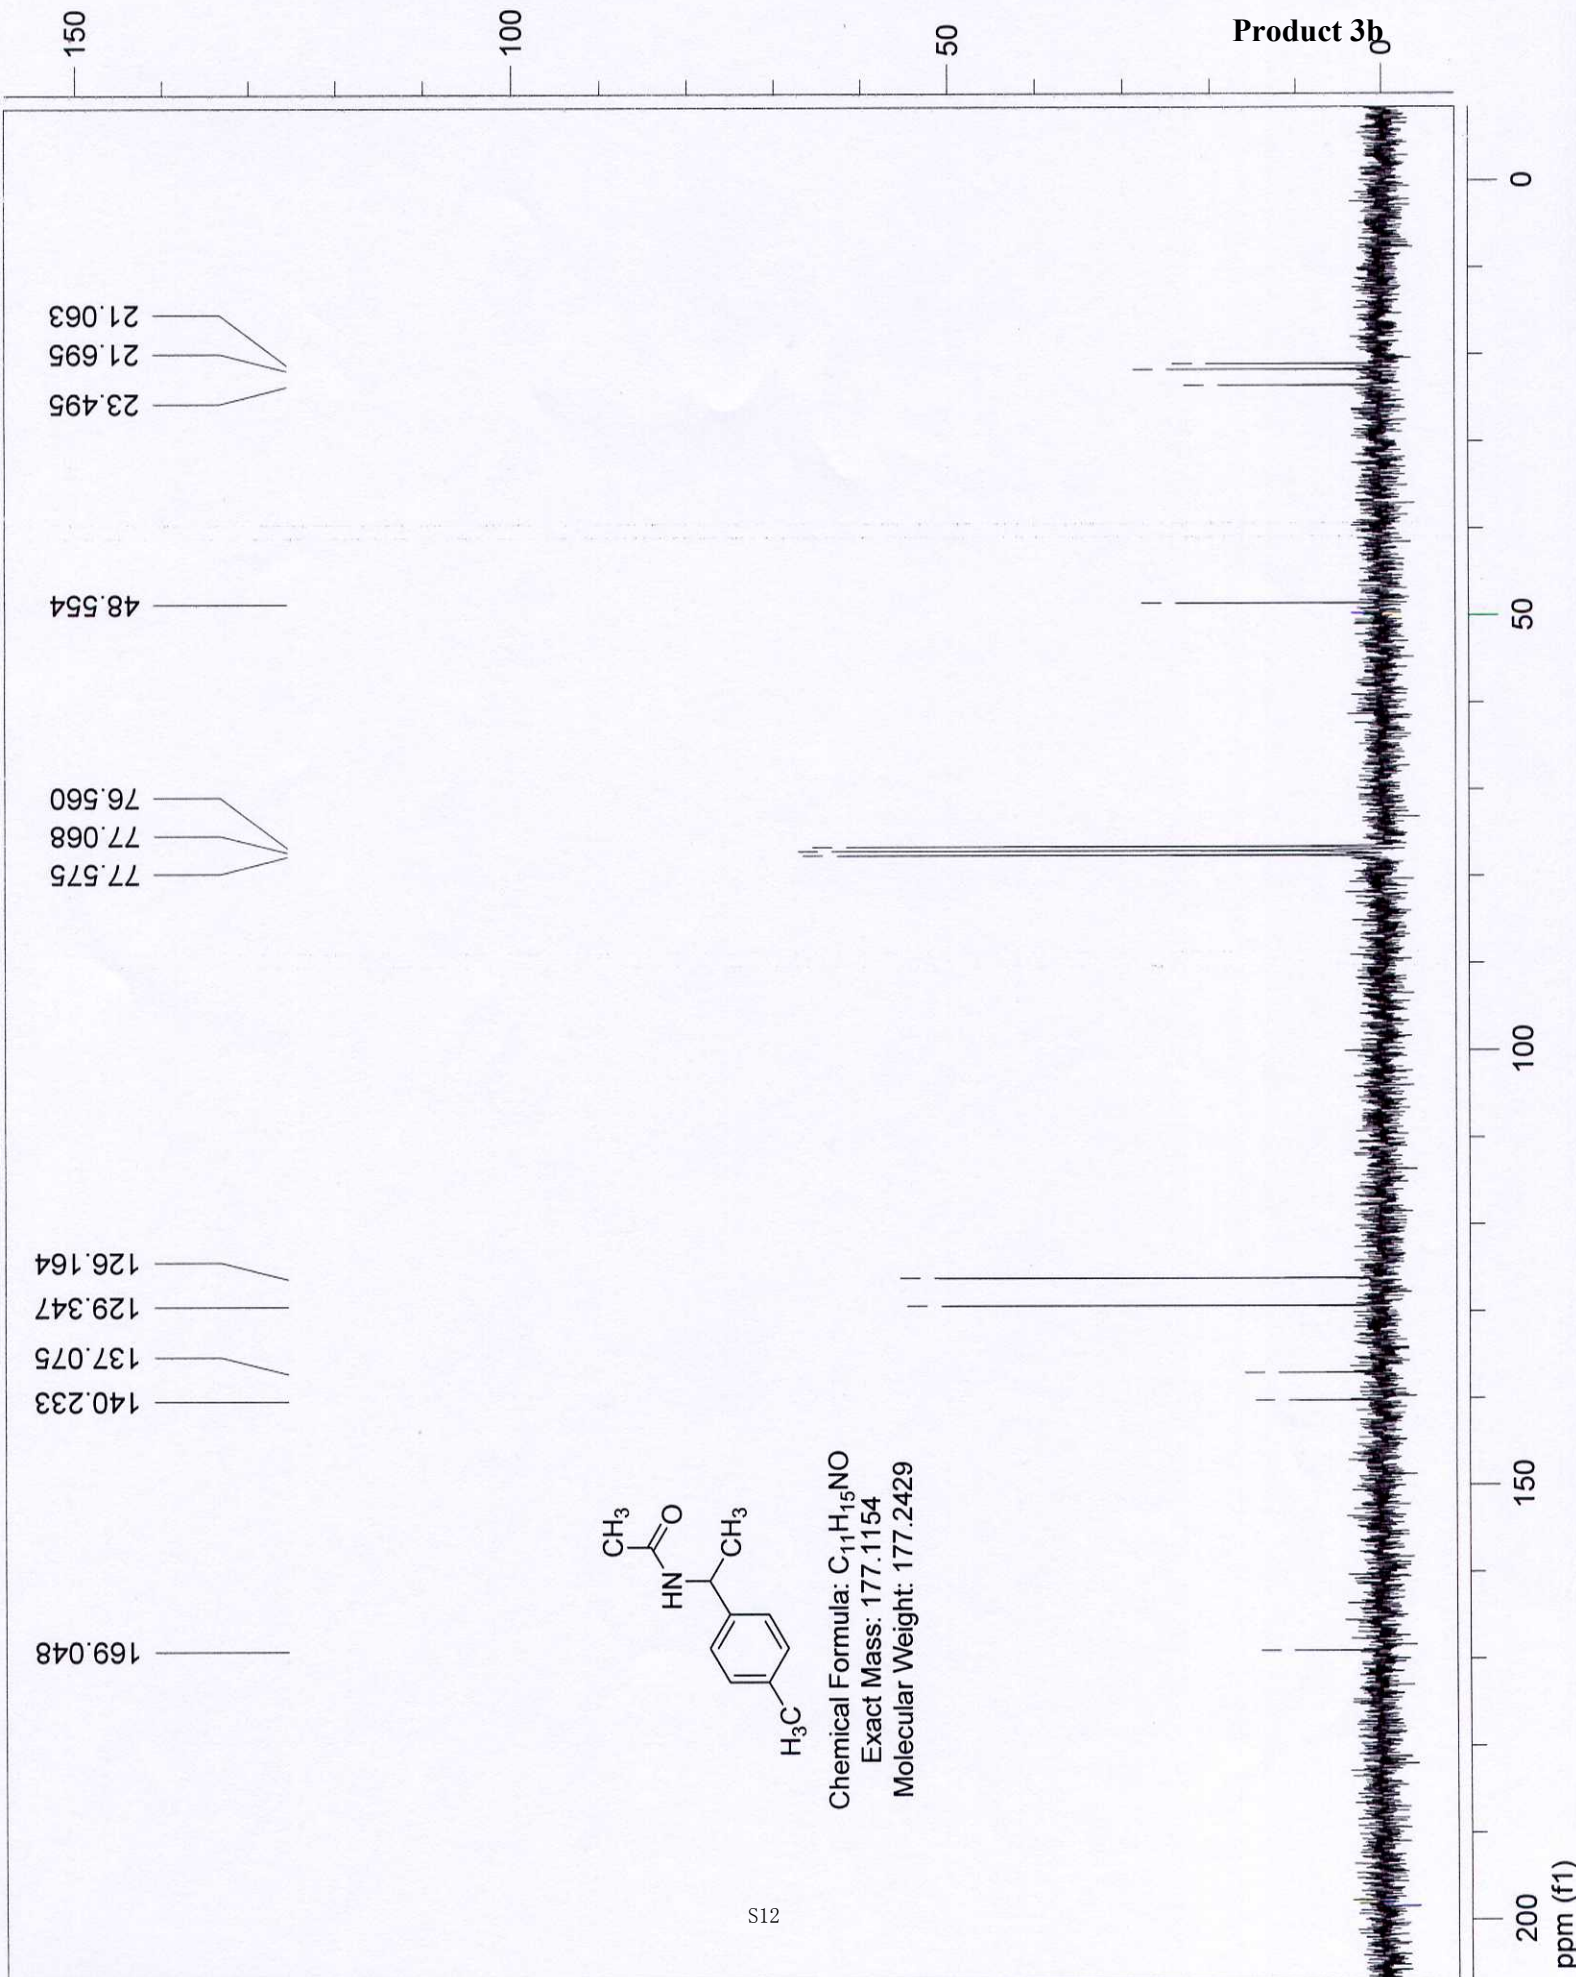

# Chromatogram : LGL3-147(AD95051)2\_channel1

Product 3b

System : HPLC  
Method : LGL  
User : Gerald Rowland

Acquired : 7/9/2008 3:33:32 PM  
Processed : 7/9/2008 3:59:08 PM  
Printed : 11/7/2008 2:52:45 PM

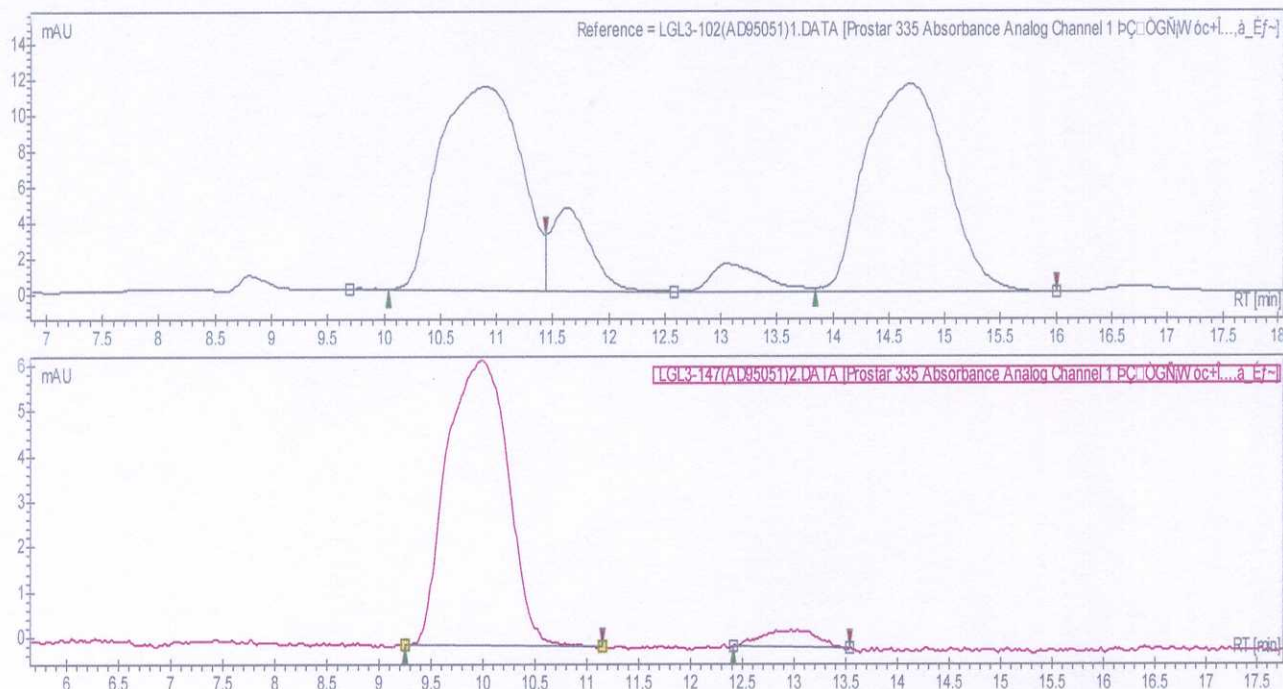

## Peak results :

LGL3-102(AD95051)1.DATA [Prostar 335 Absorbance Analog Channel 1]

| Index | Name    | Time [Min] | Quantity [% Area] | Height [mAU] | Area [mAU.Min] | Area % [%] |
|-------|---------|------------|-------------------|--------------|----------------|------------|
| 1     | UNKNOWN | 10.89      | 49.45             | 11.4         | 9.6            | 49.449     |
| 2     | UNKNOWN | 14.69      | 50.55             | 11.6         | 9.8            | 50.551     |
| Total |         |            | 100.00            | 23.0         | 19.4           | 100.000    |

LGL3-147(AD95051)2.DATA [Prostar 335 Absorbance Analog Channel 1]

| Index | Name    | Time [Min] | Quantity [% Area] | Height [mAU] | Area [mAU.Min] | Area % [%] |
|-------|---------|------------|-------------------|--------------|----------------|------------|
| 1     | UNKNOWN | 9.99       | 95.02             | 6.3          | 4.3            | 95.023     |
| 2     | UNKNOWN | 13.03      | 4.98              | 0.4          | 0.2            | 4.977      |
| Total |         |            | 100.00            | 6.7          | 4.5            | 100.000    |

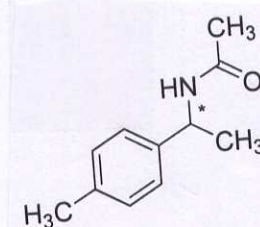

# Product 3c

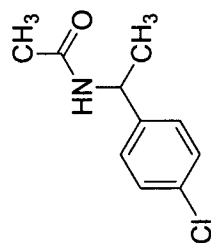

Chemical Formula:  $C_{10}H_{12}ClNO$   
 Exact Mass: 197.0607  
 Molecular Weight: 197.6614

1.415  
1.442

1.948

4.991  
5.020  
5.049  
5.078  
5.106

6.019

7.198  
7.233  
7.260  
7.295

3.28

3.30

1.07

1.00

4.48

0.0

5.0

10.0  
ppm (f1)

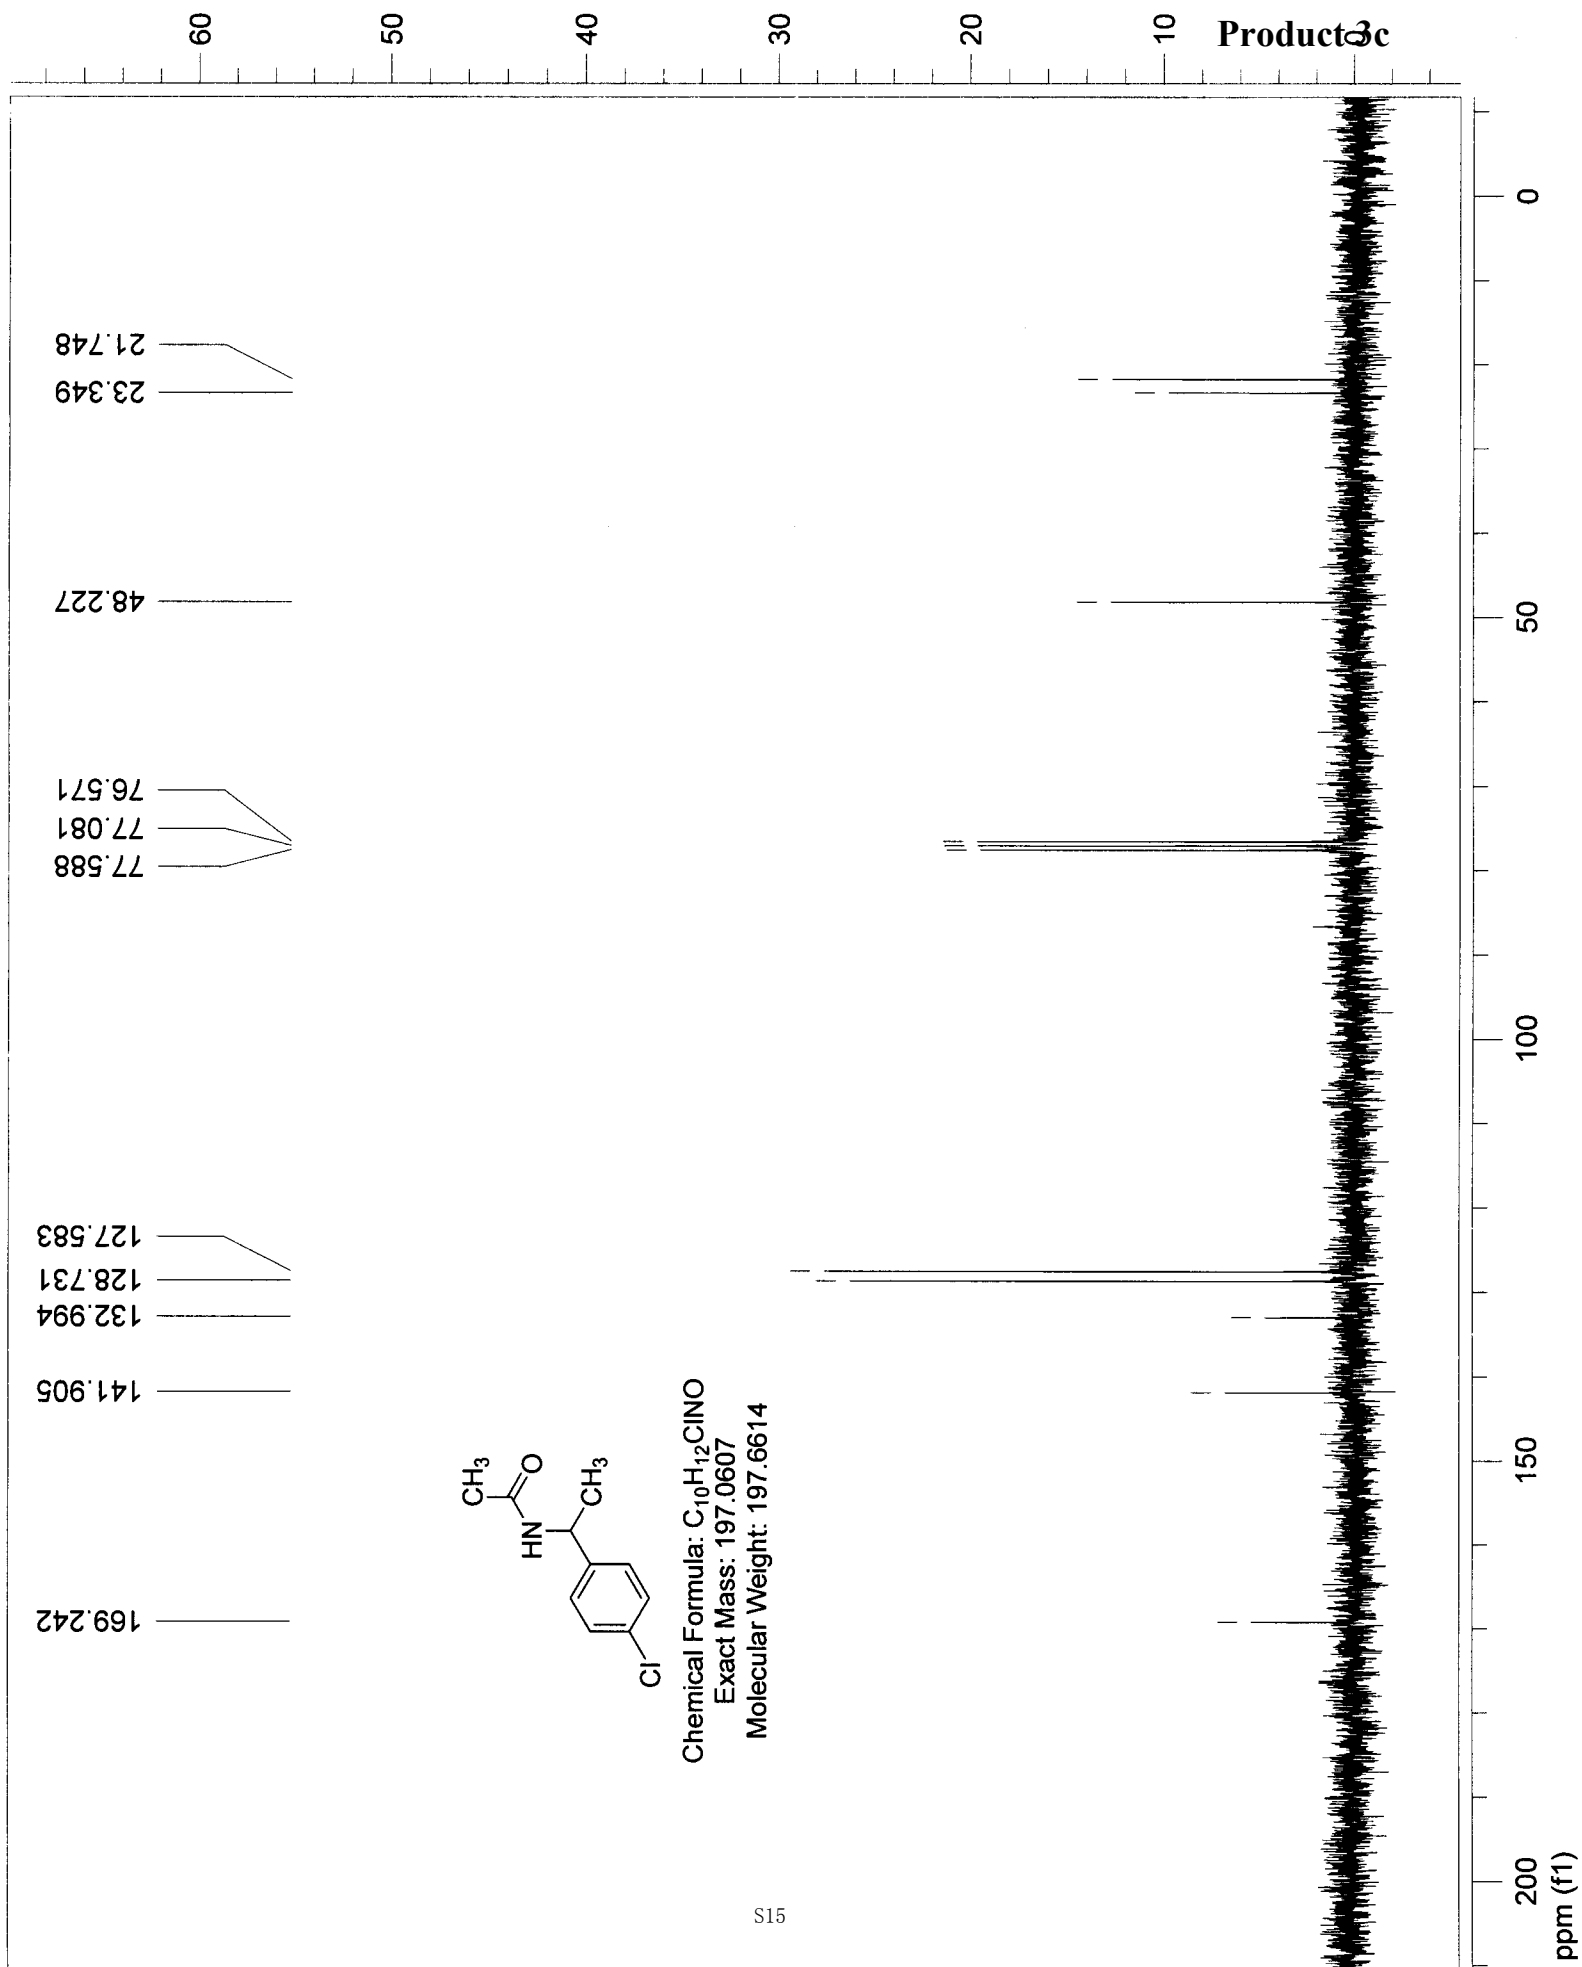



# Chromatogram : LGL3-154(AD95051)2\_channel1

## Product 3c

System : HPLC  
Method : LGL  
User : Gerald Rowland

Acquired : 7/15/2008 4:50:18 PM  
Processed : 7/15/2008 5:12:32 PM  
Printed : 10/29/2008 2:23:08 PM

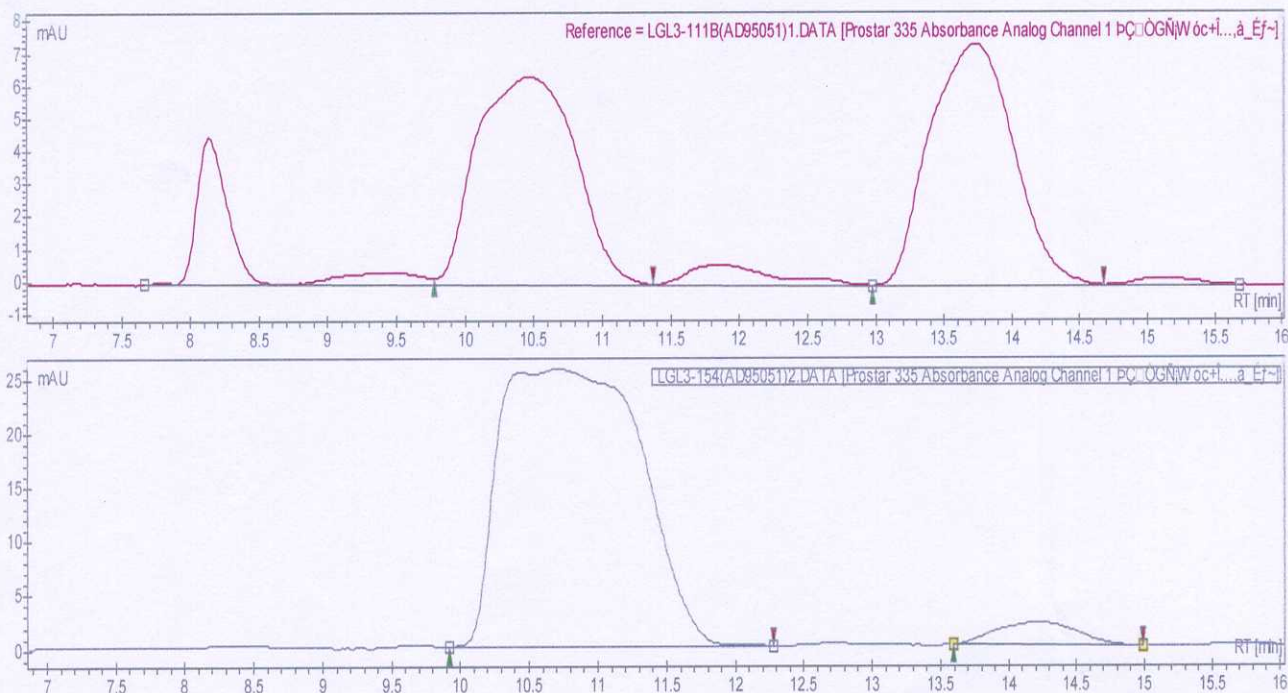

### Peak results :

LGL3-111B(AD95051)1.DATA [Prostar 335 Absorbance Analog Channel 1 bC OGÑjW óc+Î...à\_Éf~]

| Index | Name    | Time [Min] | Quantity [% Area] | Height [mAU] | Area [mAU.Min] | Area % [%] |
|-------|---------|------------|-------------------|--------------|----------------|------------|
| 1     | UNKNOWN | 10.47      | 50.22             | 6.4          | 5.3            | 50.222     |
| 2     | UNKNOWN | 13.73      | 49.78             | 7.4          | 5.3            | 49.778     |
| Total |         |            | 100.00            | 13.8         | 10.6           | 100.000    |

LGL3-154(AD95051)2.DATA [Prostar 335 Absorbance Analog Channel 1 bC OGÑjW óc+Î...à\_Éf~]

| Index | Name    | Time [Min] | Quantity [% Area] | Height [mAU] | Area [mAU.Min] | Area % [%] |
|-------|---------|------------|-------------------|--------------|----------------|------------|
| 2     | UNKNOWN | 10.71      | 95.49             | 25.7         | 30.8           | 95.490     |
| 1     | UNKNOWN | 14.21      | 4.51              | 2.1          | 1.5            | 4.510      |
| Total |         |            | 100.00            | 27.8         | 32.3           | 100.000    |

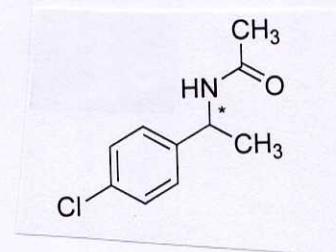



Product 3d

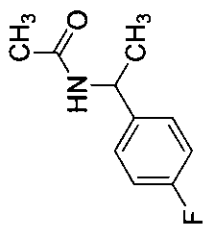

Chemical Formula:  $C_{10}H_{12}FNO$   
 Exact Mass: 181.0903  
 Molecular Weight: 181.2068

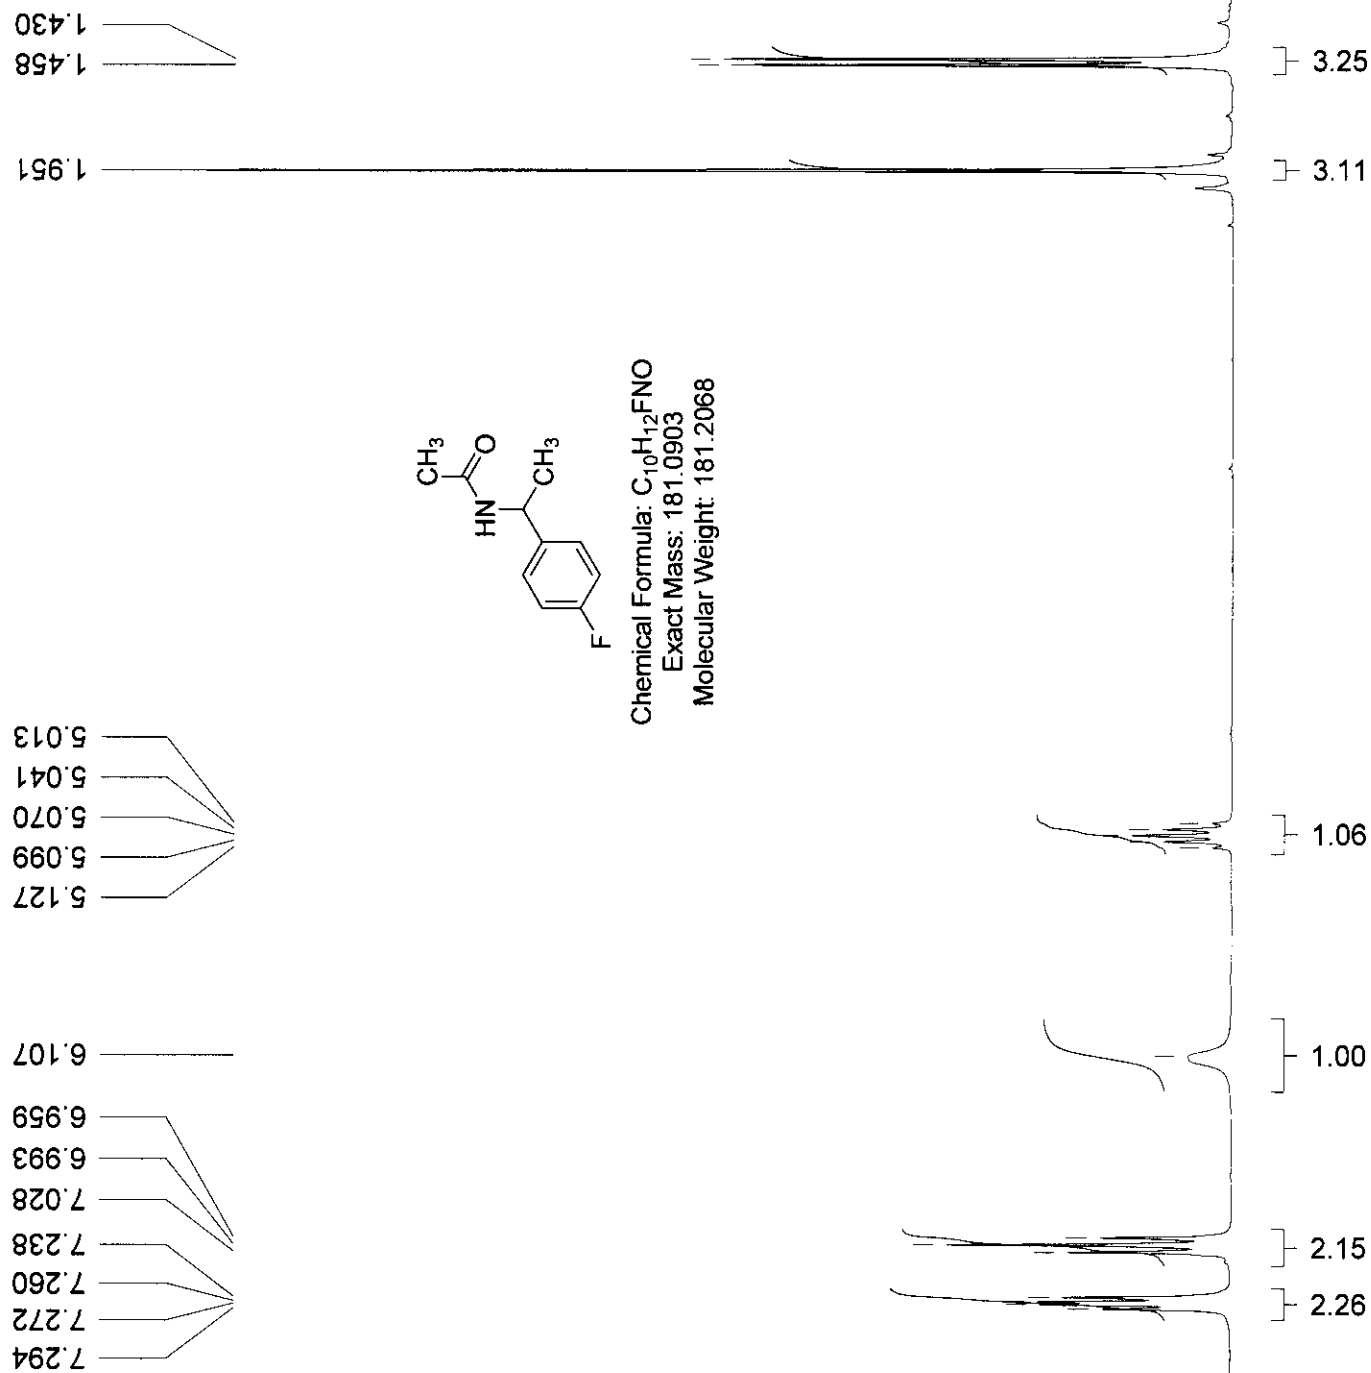

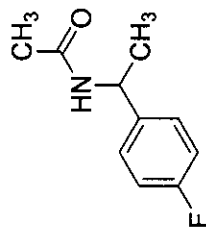

Chemical Formula:  $C_{10}H_{12}FNO$   
Exact Mass: 181.0903  
Molecular Weight: 181.2068

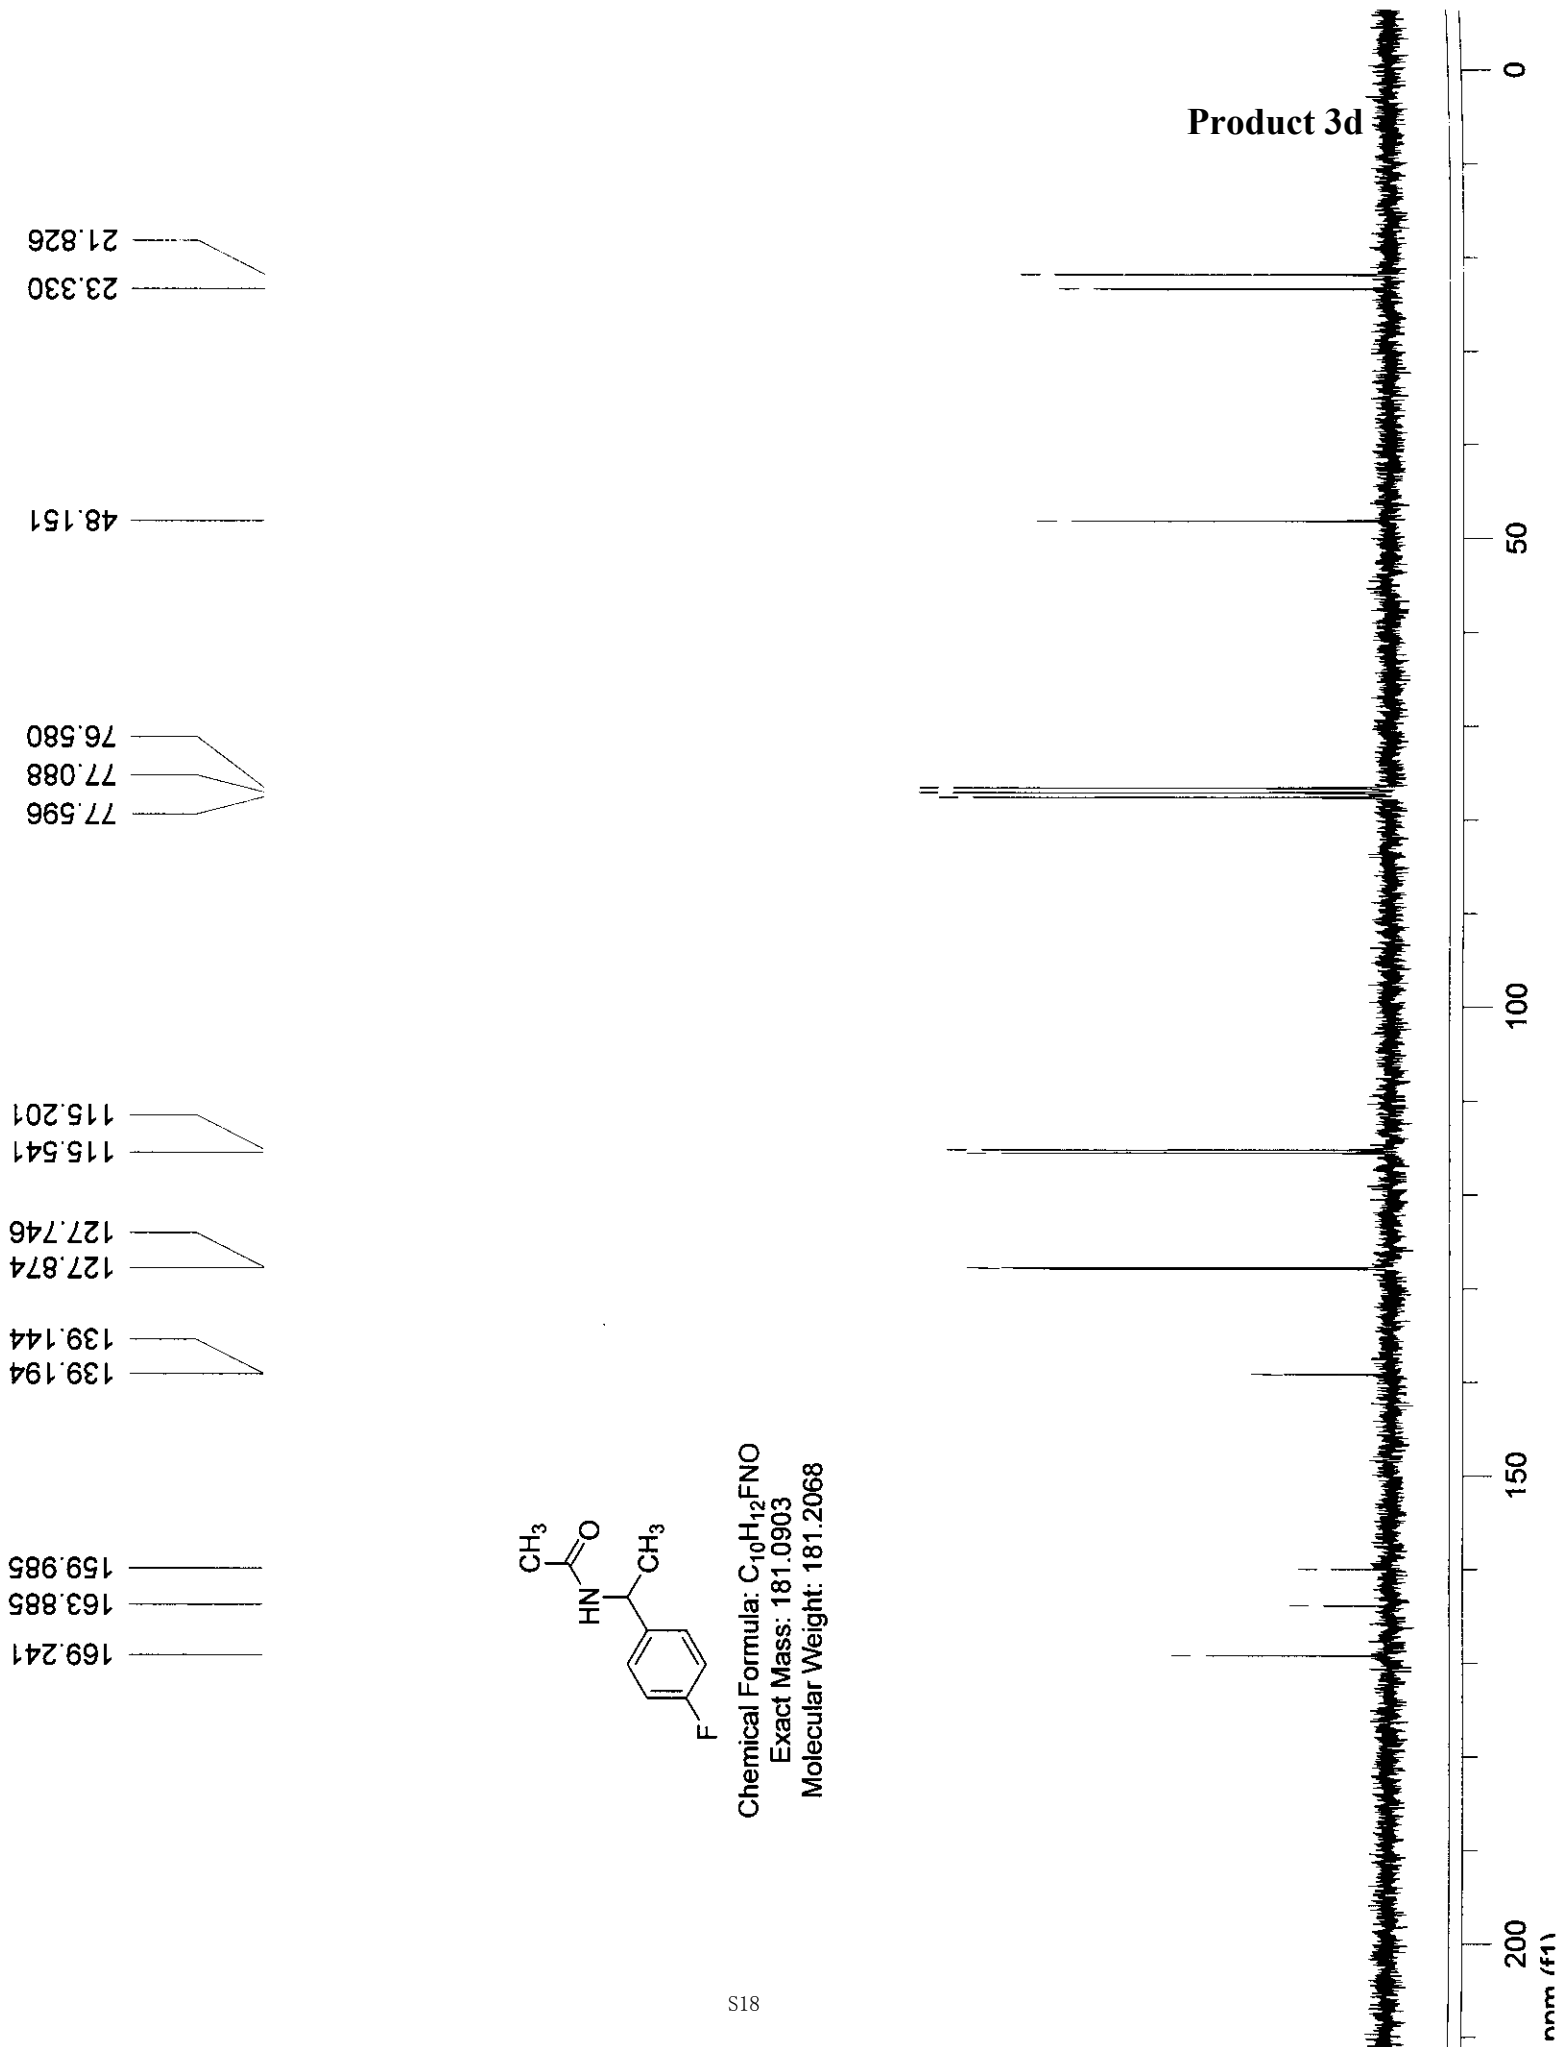

# Chromatogram : LGL3-155(AD95051)1\_channel1

## Product 3d

System : HPLC  
Method : LGL  
User : Gerald Rowland

Acquired : 7/15/2008 5:12:23 PM  
Processed : 7/15/2008 5:32:59 PM  
Printed : 10/29/2008 4:18:57 PM

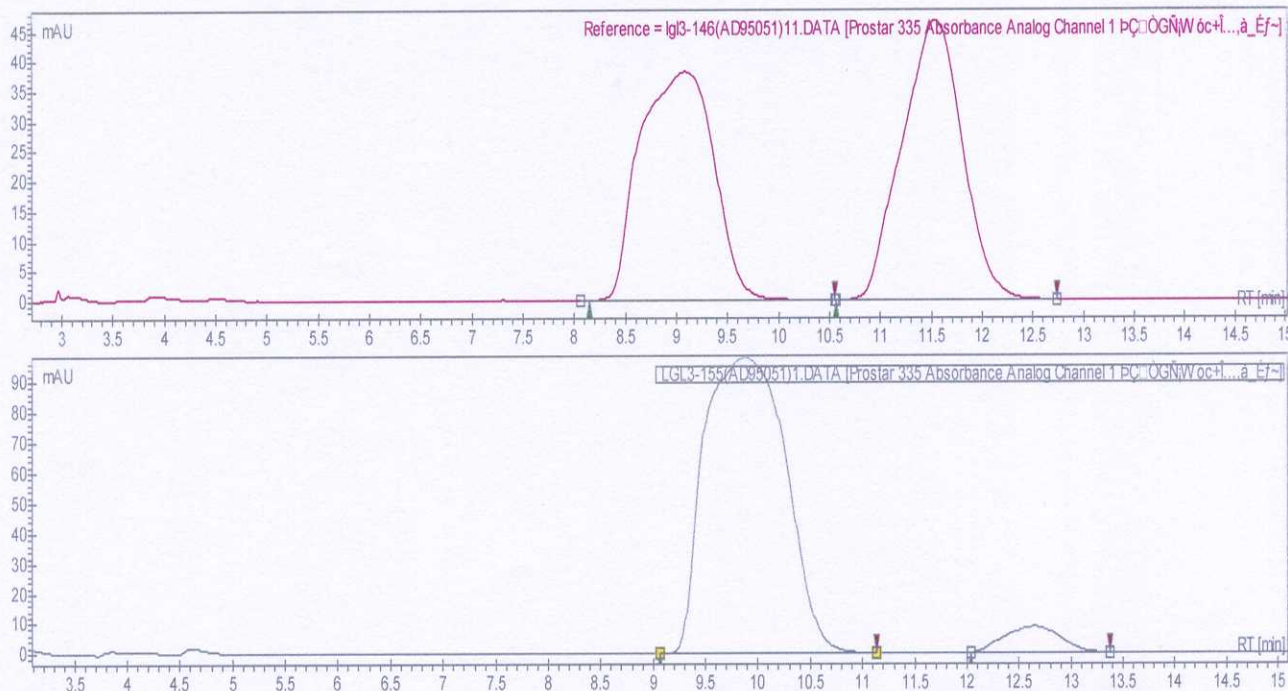

### Peak results :

Igl3-146(AD95051)11.DAT [Prostar 335 Absorbance Analog Channel 1 bÇ□ÖGÑjW óc+Î....à\_Éf~]

| Index | Name    | Time [Min] | Quantity [% Area] | Height [mAU] | Area [mAU.Min] | Area % [%] |
|-------|---------|------------|-------------------|--------------|----------------|------------|
| 1     | UNKNOWN | 9.08       | 50.04             | 38.0         | 31.9           | 50.037     |
| 2     | UNKNOWN | 11.55      | 49.96             | 46.6         | 31.9           | 49.963     |
| Total |         |            | 100.00            | 84.7         | 63.8           | 100.000    |

LGL3-155(AD95051)1.DAT [Prostar 335 Absorbance Analog Channel 1 bÇ□ÖGÑjW óc+Î....à\_Éf~]

| Index | Name    | Time [Min] | Quantity [% Area] | Height [mAU] | Area [mAU.Min] | Area % [%] |
|-------|---------|------------|-------------------|--------------|----------------|------------|
| 1     | UNKNOWN | 9.88       | 94.38             | 97.7         | 88.5           | 94.375     |
| 2     | UNKNOWN | 12.65      | 5.62              | 8.5          | 5.3            | 5.625      |
| Total |         |            | 100.00            | 106.2        | 93.7           | 100.000    |

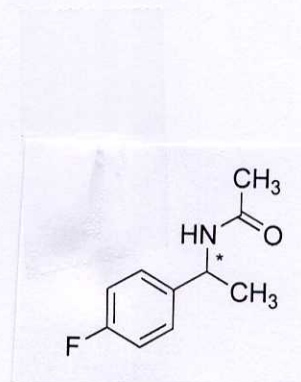

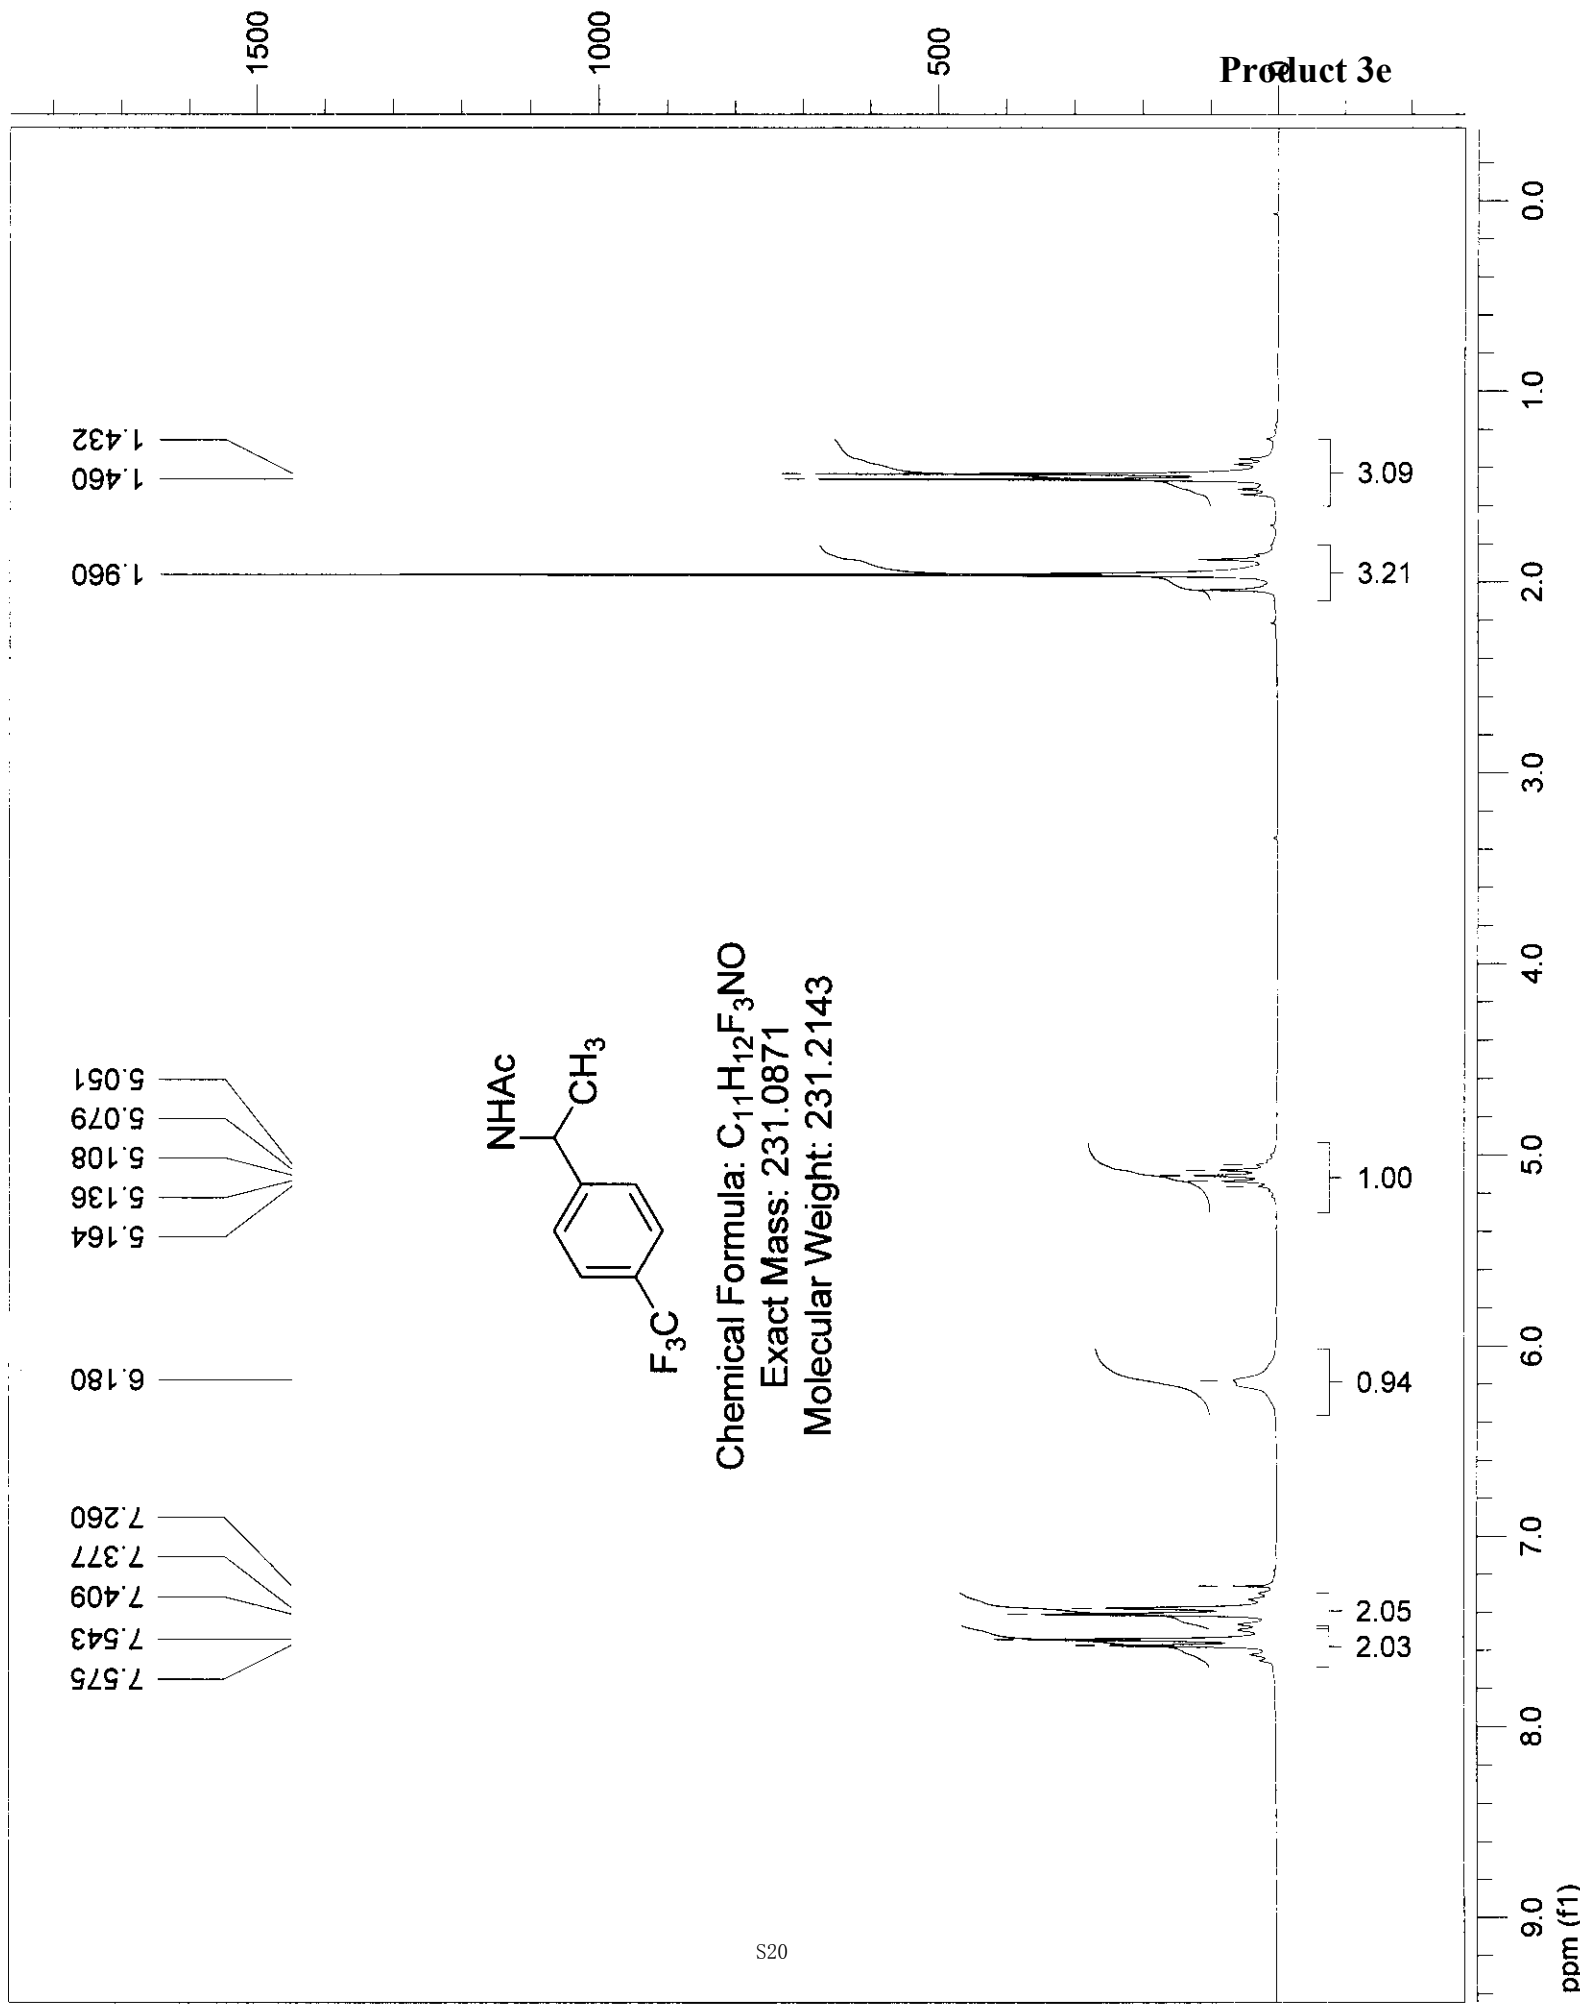

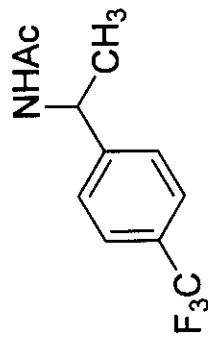

Chemical Formula:  $C_{11}H_{12}F_3NO$   
 Exact Mass: 231.0871  
 Molecular Weight: 231.2143

Product 3a

21.833  
23.239

48.586

76.560  
77.068  
77.576

121.946  
125.484  
125.544  
125.604  
125.663  
126.271  
126.441  
129.226  
129.740

147.519

169.414

# Chromatogram : LGL3-193(AD95051)2\_channel1

Product 3e

System : HPLC  
Method : LGL  
User : Gerald Rowland

Acquired : 8/26/2008 4:54:24 PM  
Processed : 8/26/2008 5:18:19 PM  
Printed : 8/26/2008 6:02:25 PM

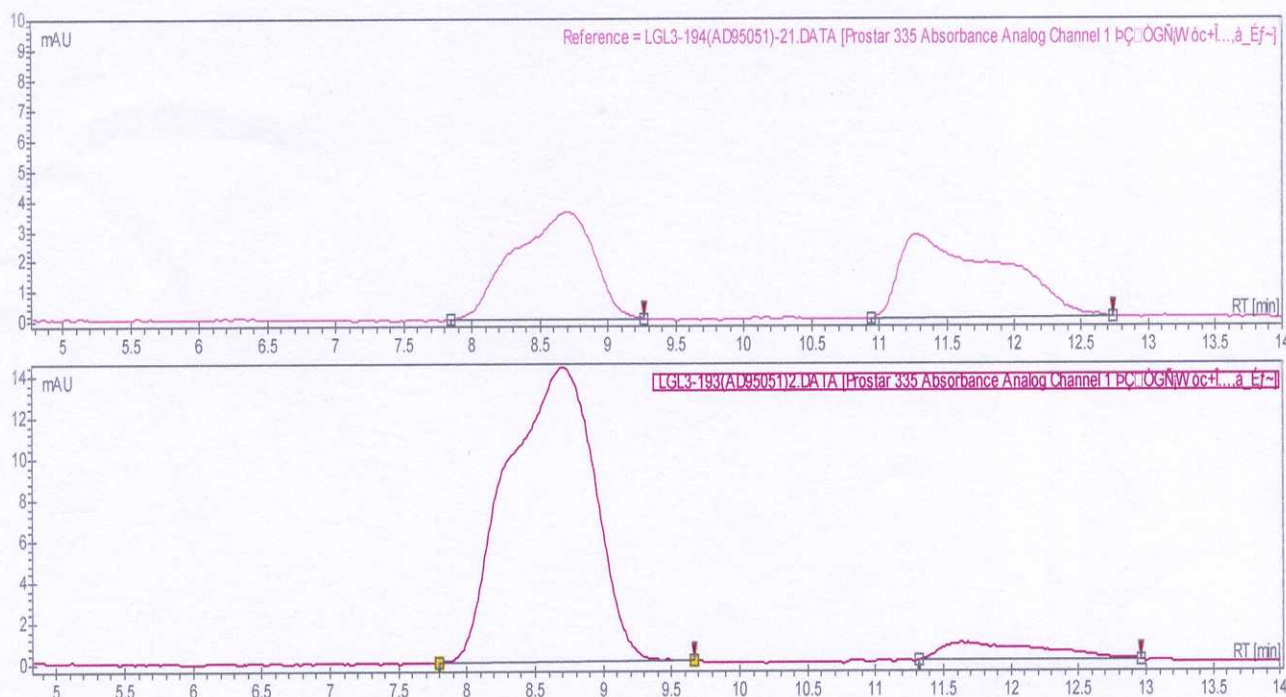

## Peak results :

LGL3-194(AD95051)-21.D [Prostar 335 Absorbance Analog Channel 1]

| Index | Name    | Time [Min] | Quantity [% Area] | Height [mAU] | Area [mAU.Min] | Area % [%] |
|-------|---------|------------|-------------------|--------------|----------------|------------|
| 1     | UNKNOWN | 8.71       | 50.12             | 3.5          | 2.4            | 50.123     |
| 2     | UNKNOWN | 11.27      | 49.88             | 2.8          | 2.4            | 49.877     |
| Total |         |            | 100.00            | 6.3          | 4.8            | 100.000    |

LGL3-193(AD95051)2.D [Prostar 335 Absorbance Analog Channel 1]

| Index | Name    | Time [Min] | Quantity [% Area] | Height [mAU] | Area [mAU.Min] | Area % [%] |
|-------|---------|------------|-------------------|--------------|----------------|------------|
| 1     | UNKNOWN | 8.71       | 93.64             | 14.3         | 10.7           | 93.639     |
| 2     | UNKNOWN | 11.63      | 6.36              | 0.8          | 0.7            | 6.361      |
| Total |         |            | 100.00            | 15.1         | 11.4           | 100.000    |

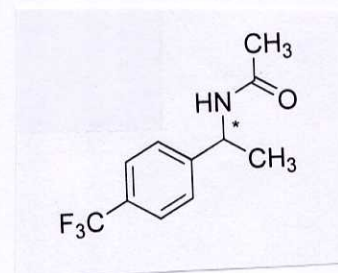

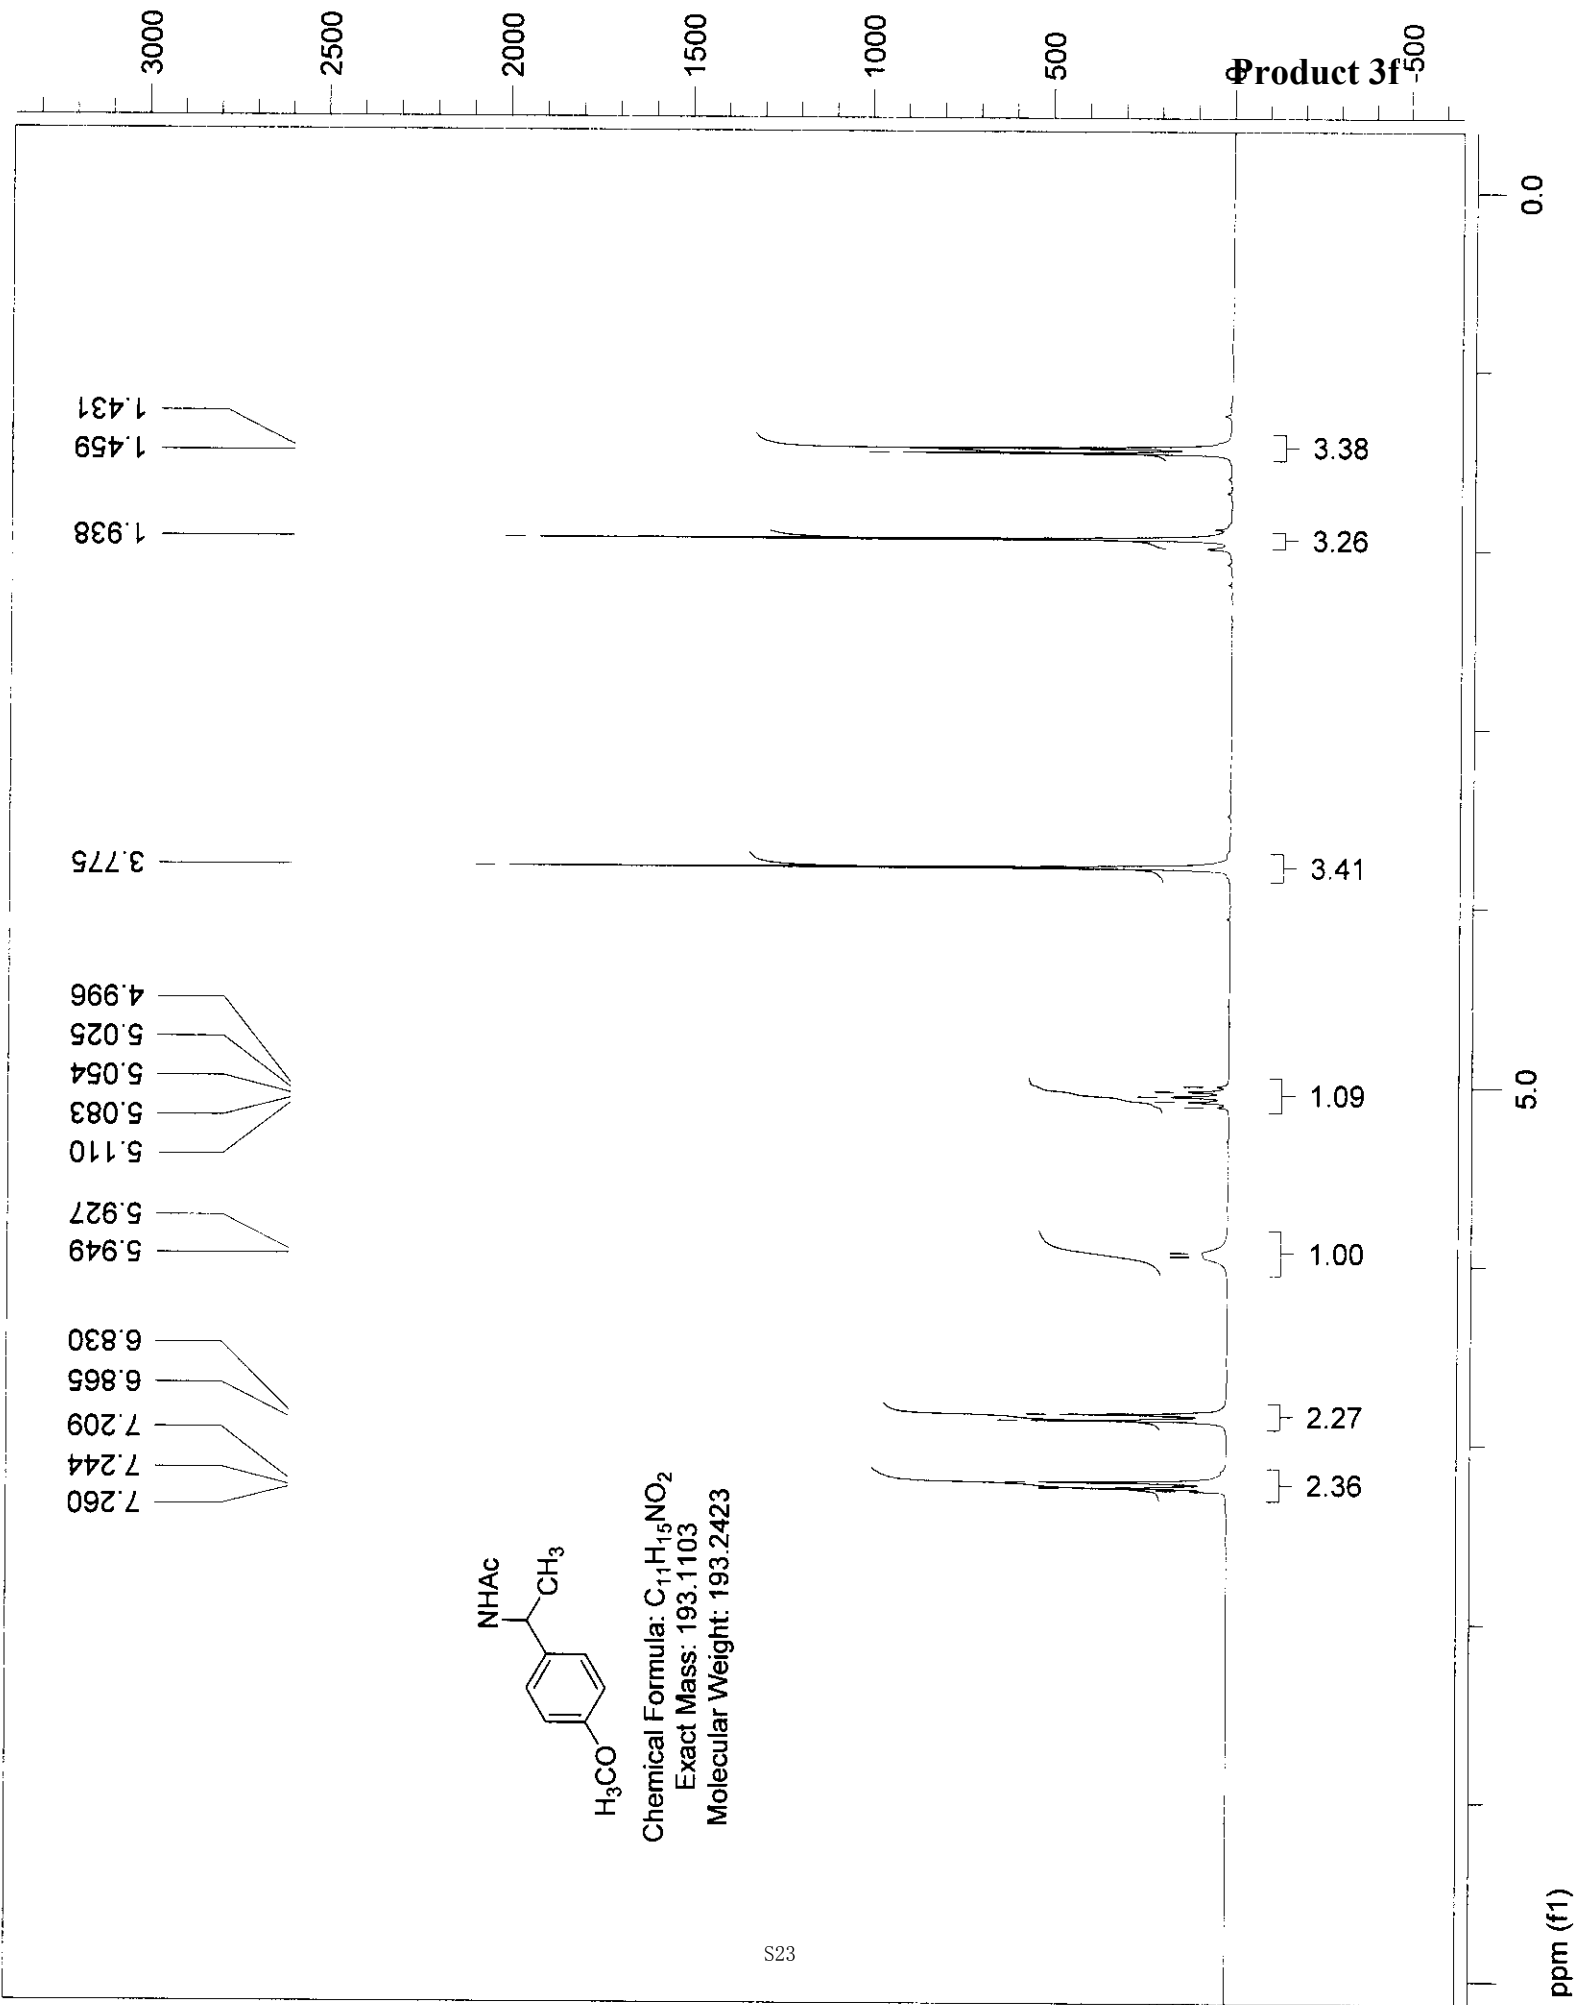

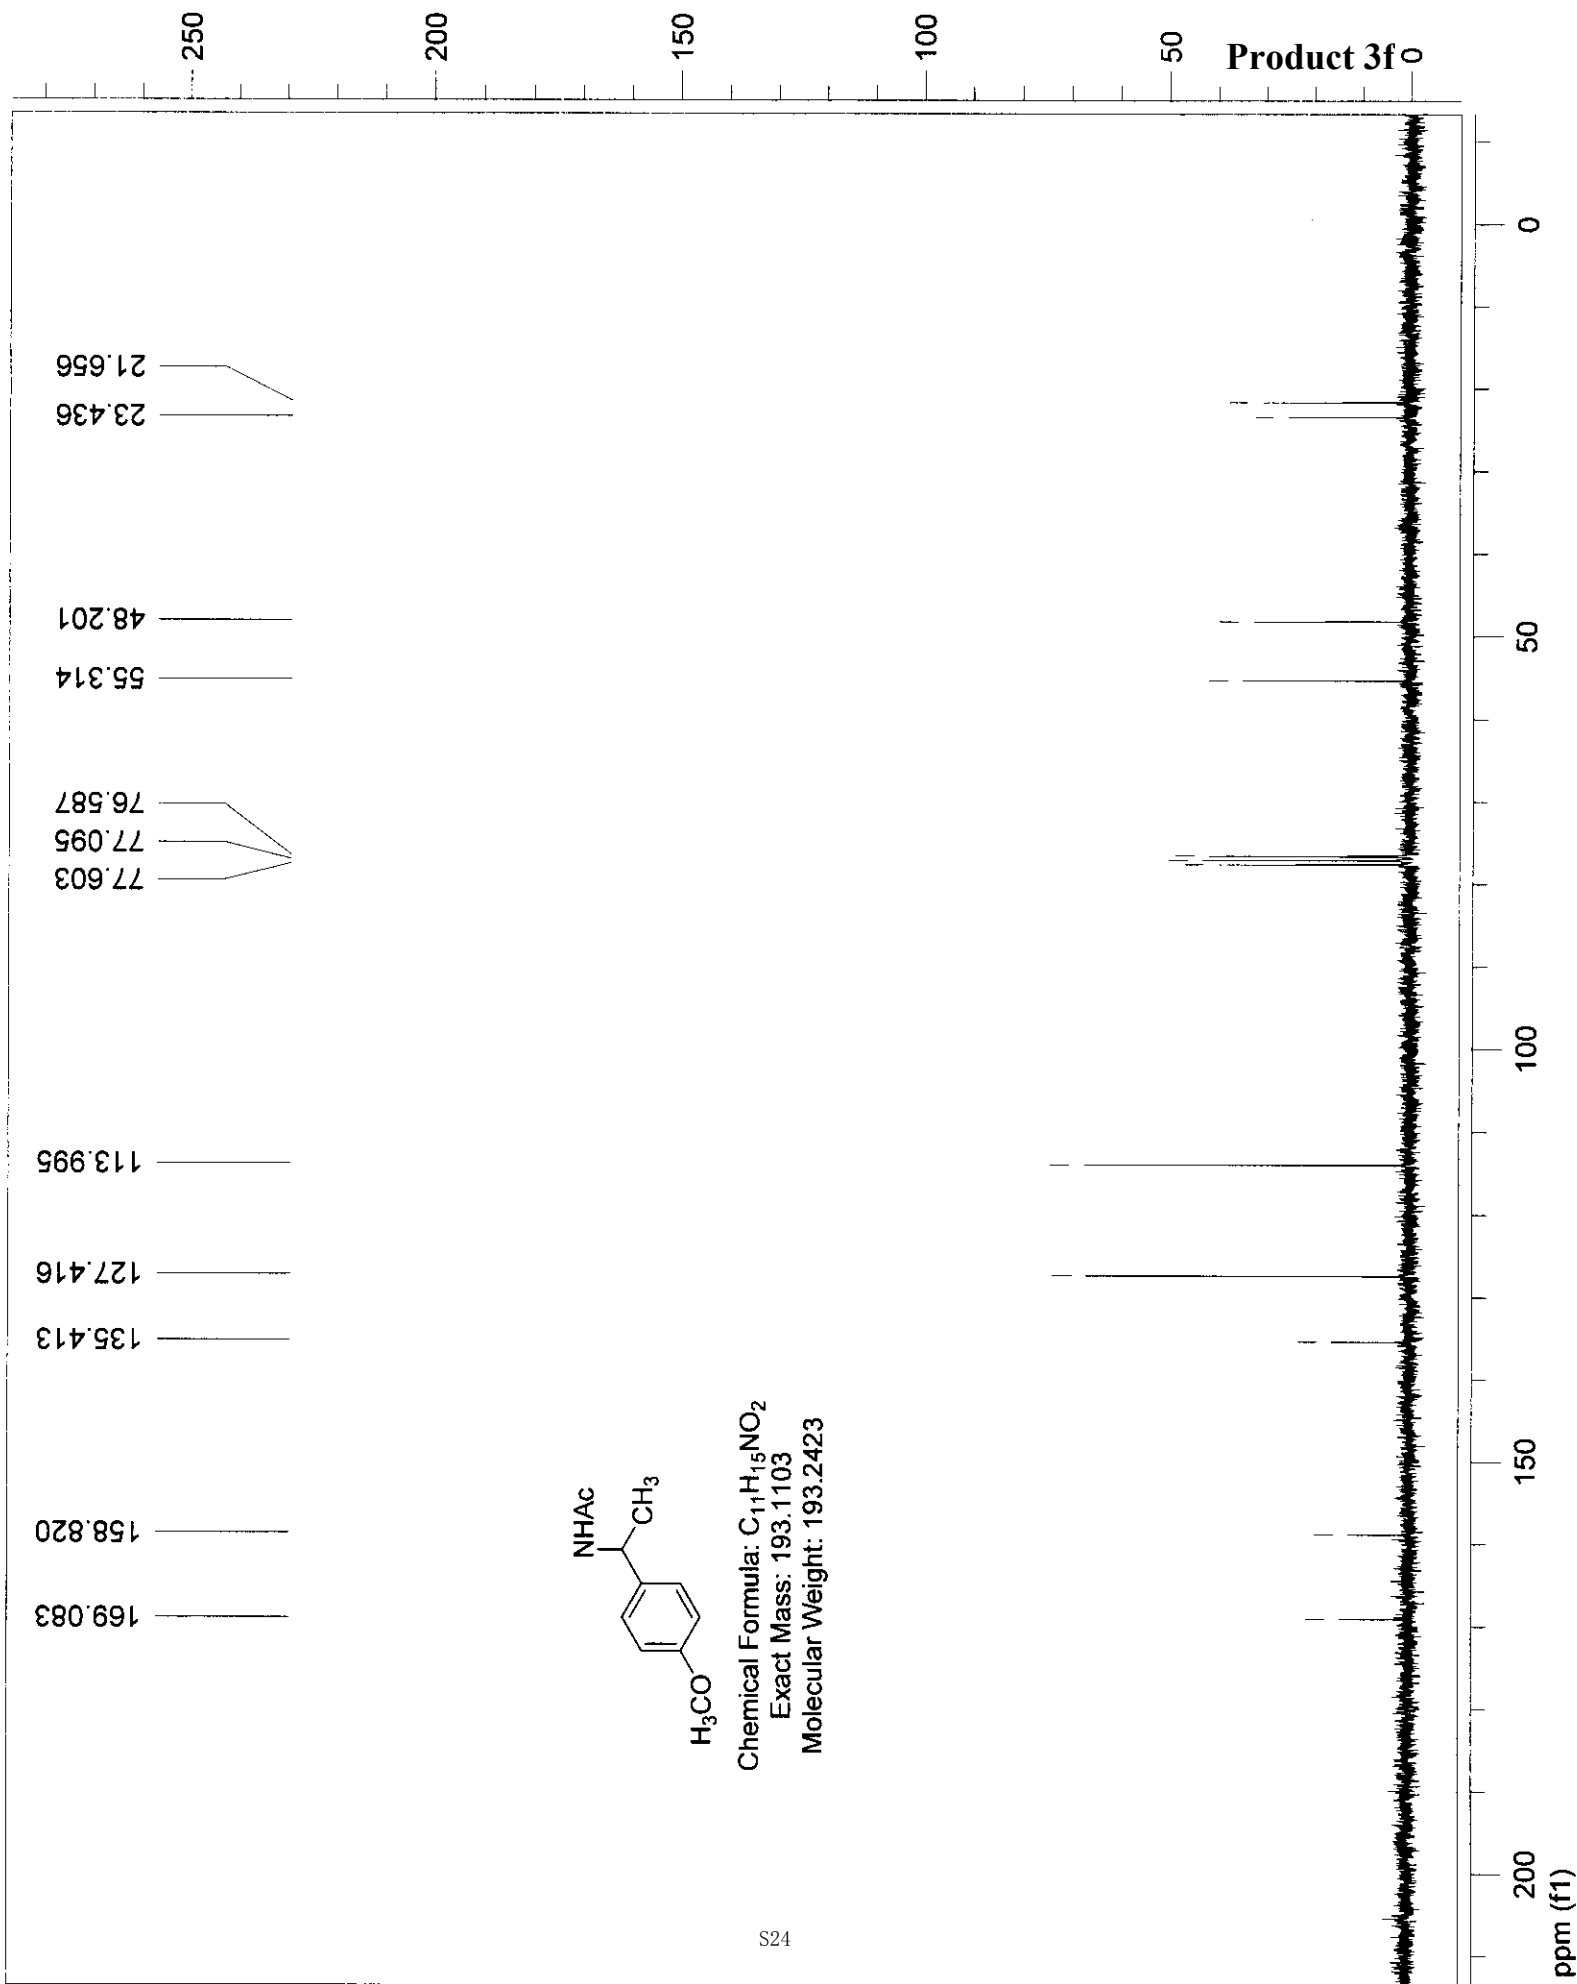



# Chromatogram : LGL3-97(AD95051)1\_channel1

Product 3f

System : HPLC  
Method : LGL  
User : Gerald Rowland

Acquired : 5/30/2008 11:14:04 AM  
Processed : 5/30/2008 12:13:47 PM  
Printed : 5/30/2008 12:14:52 PM

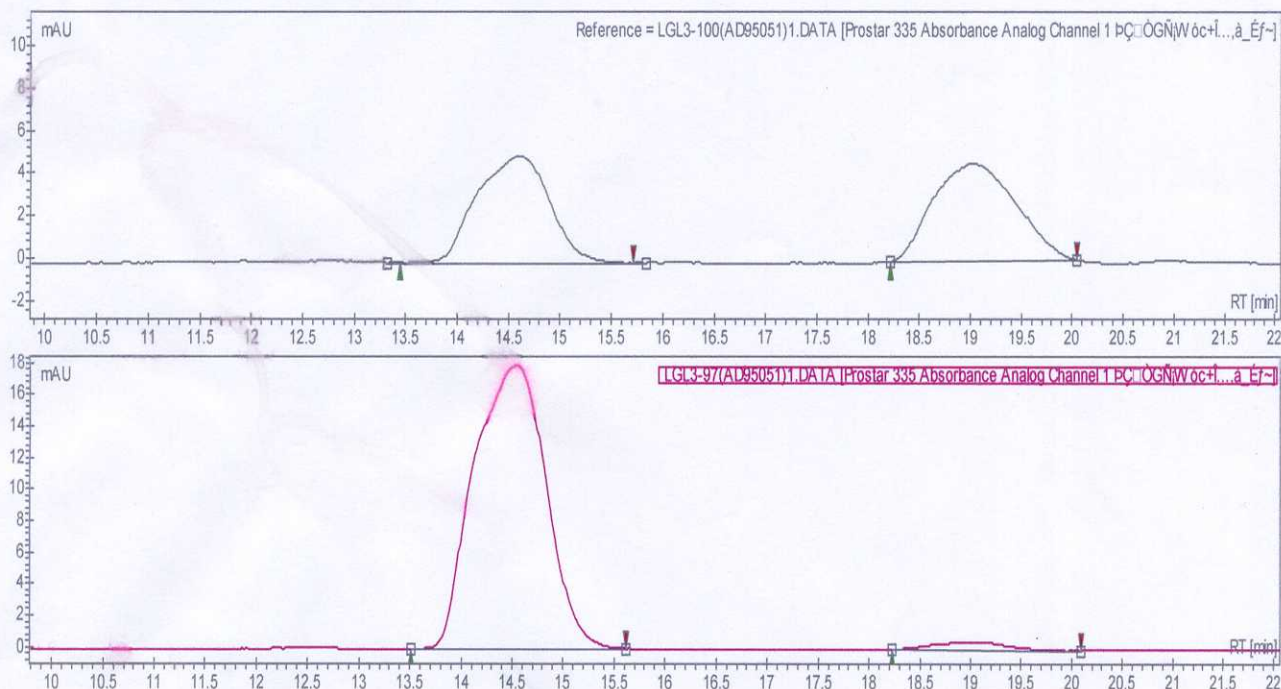

## Peak results :

LGL3-100(AD95051)1.DAT [Prostar 335 Absorbance Analog Channel 1 bÇÖGÑjW óc+Î...â\_Éf~]

| Index | Name    | Time [Min] | Quantity [% Area] | Height [mAU] | Area [mAU.Min] | Area % [%] |
|-------|---------|------------|-------------------|--------------|----------------|------------|
| 1     | UNKNOWN | 14.61      | 48.89             | 5.0          | 4.1            | 48.893     |
| 2     | UNKNOWN | 19.04      | 51.11             | 4.6          | 4.3            | 51.107     |
| Total |         |            | 100.00            | 9.6          | 8.4            | 100.000    |

LGL3-97(AD95051)1.DAT [Prostar 335 Absorbance Analog Channel 1 bÇÖGÑjW óc+Î...â\_Éf~]

| Index | Name    | Time [Min] | Quantity [% Area] | Height [mAU] | Area [mAU.Min] | Area % [%] |
|-------|---------|------------|-------------------|--------------|----------------|------------|
| 1     | UNKNOWN | 14.53      | 97.44             | 18.0         | 14.7           | 97.436     |
| 2     | UNKNOWN | 19.00      | 2.56              | 0.5          | 0.4            | 2.564      |
| Total |         |            | 100.00            | 18.4         | 15.1           | 100.000    |

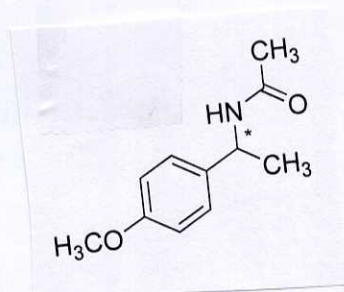

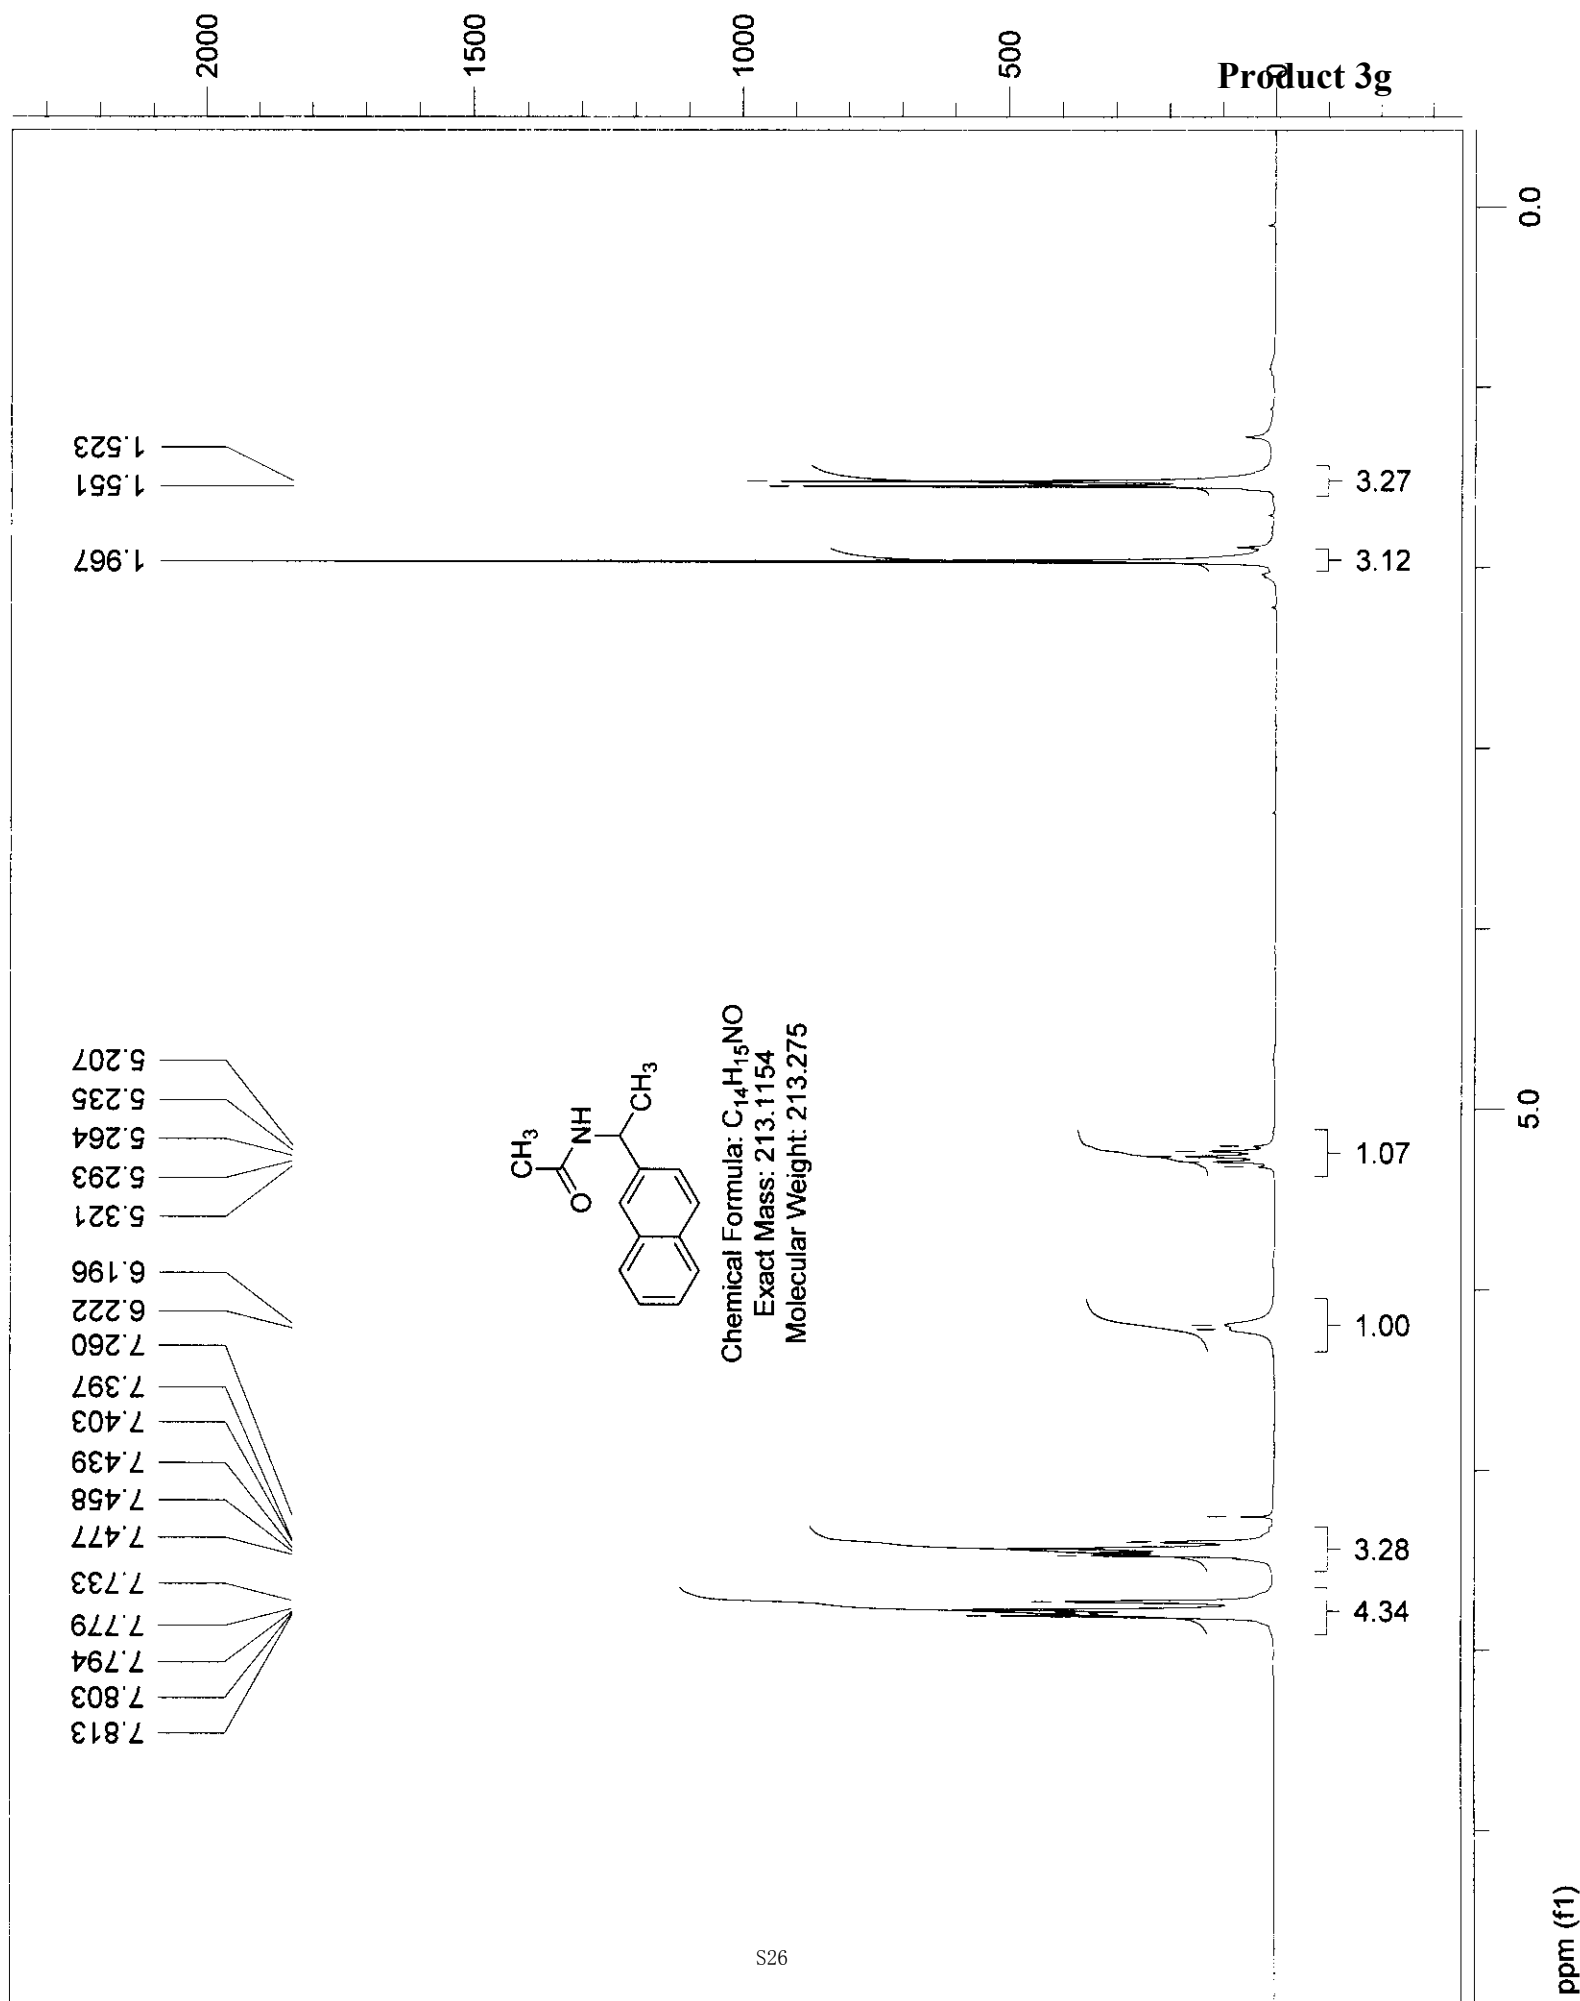

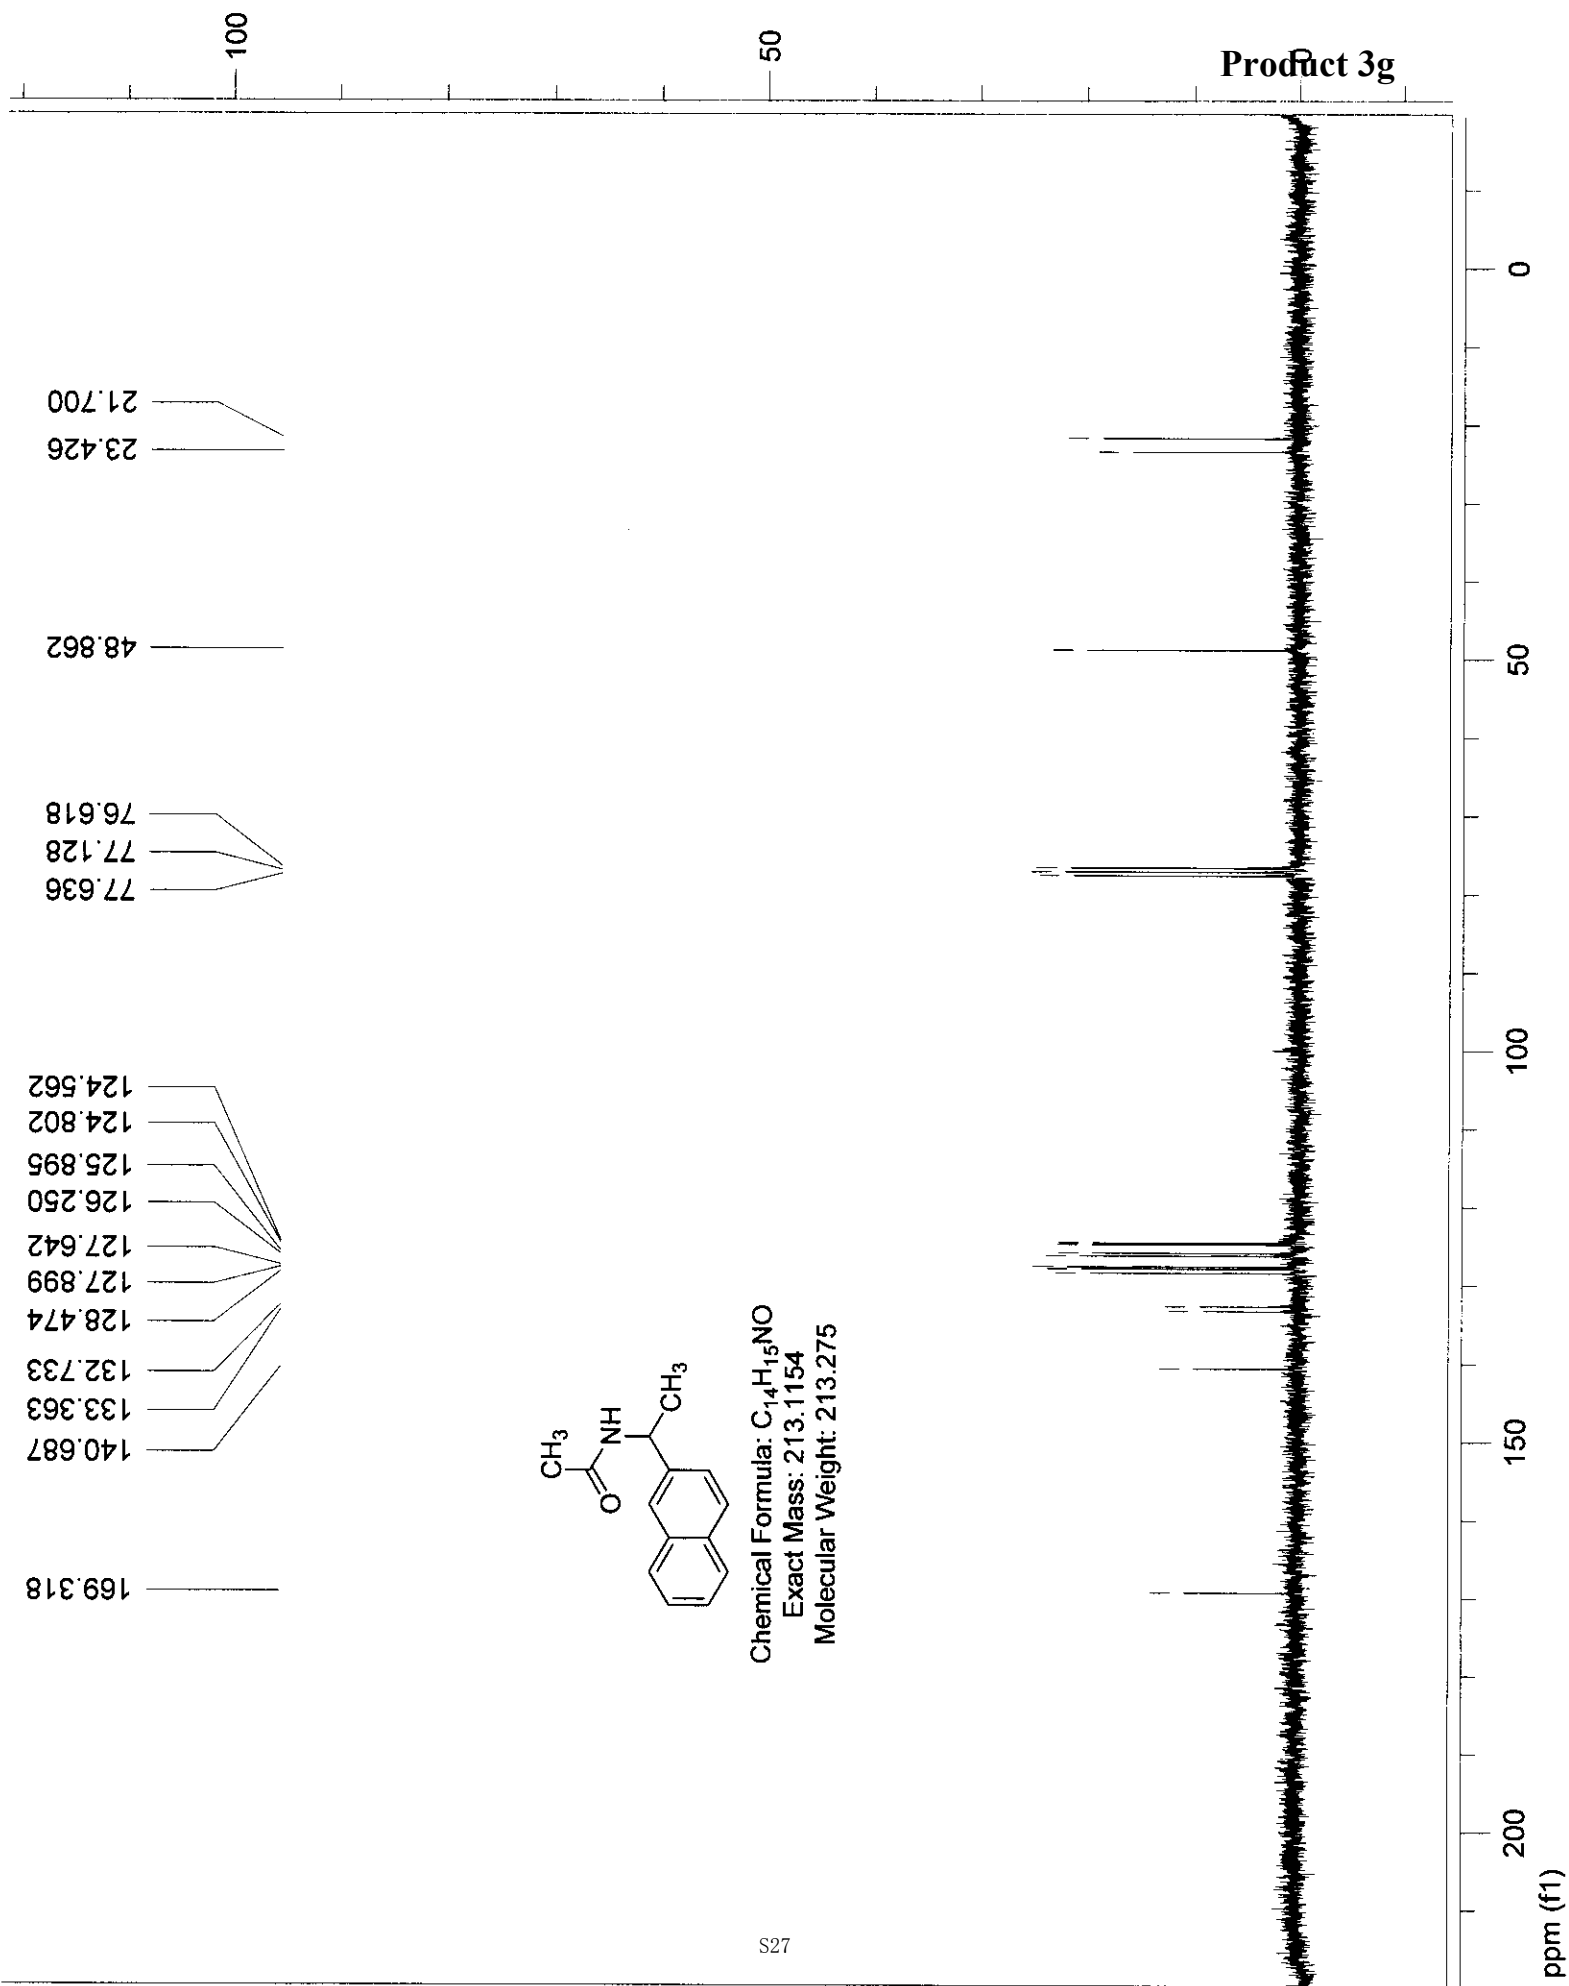

# Chromatogram : LGL3-151(AD95051)1\_channel1

Product 3g

System : HPLC  
Method : LGL  
User : Gerald Rowland

Acquired : 7/11/2008 11:47:20 AM  
Processed : 7/11/2008 12:16:32 PM  
Printed : 10/30/2008 9:51:23 AM

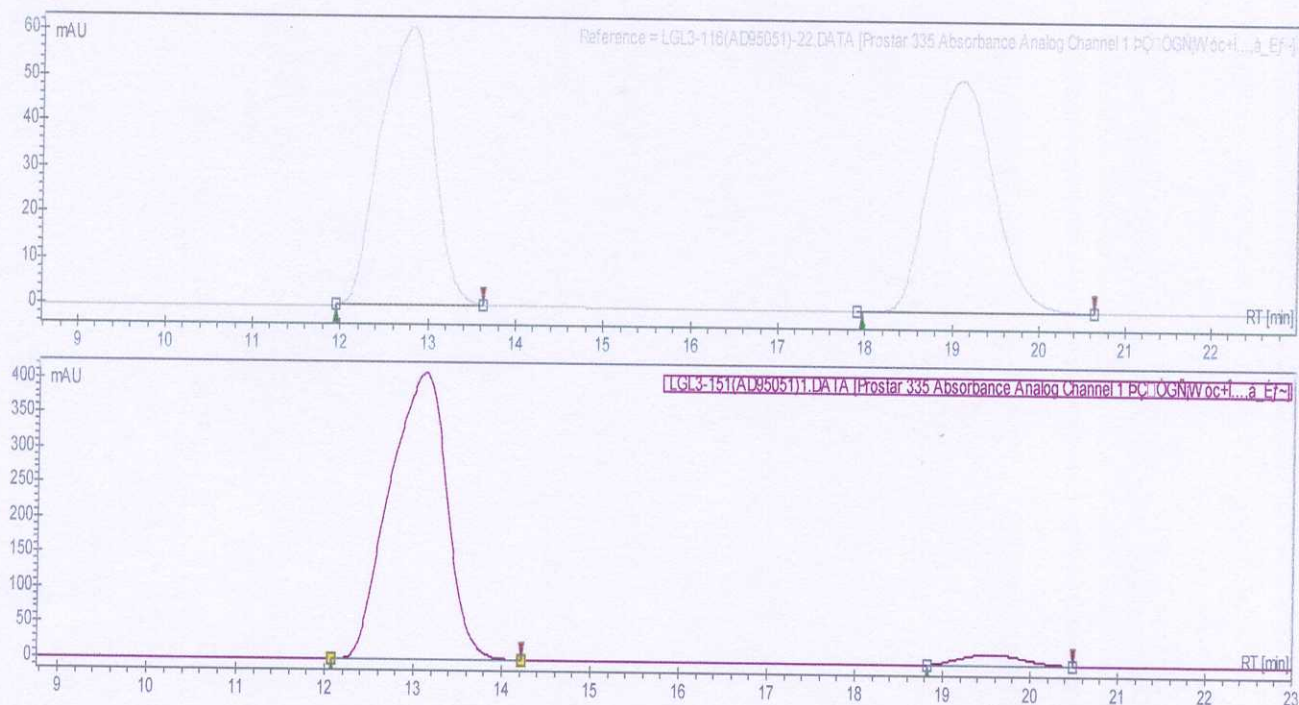

## Peak results :

LGL3-116(AD95051)-22.DAT [Prostar 335 Absorbance Analog Channel 1 PQ:OGN\W oc+I....a\_Ef~]

| Index | Name    | Time [Min] | Quantity [% Area] | Height [mAU] | Area [mAU.Min] | Area % [%] |
|-------|---------|------------|-------------------|--------------|----------------|------------|
| 2     | UNKNOWN | 12.80      | 49.69             | 60.8         | 42.6           | 49.694     |
| 1     | UNKNOWN | 19.09      | 50.31             | 50.5         | 43.2           | 50.306     |
| Total |         |            | 100.00            | 111.3        | 85.8           | 100.000    |

LGL3-151(AD95051)1.DAT [Prostar 335 Absorbance Analog Channel 1 PQ:OGN\W oc+I....a\_Ef~]

| Index | Name    | Time [Min] | Quantity [% Area] | Height [mAU] | Area [mAU.Min] | Area % [%] |
|-------|---------|------------|-------------------|--------------|----------------|------------|
| 1     | UNKNOWN | 13.12      | 95.96             | 410.1        | 306.2          | 95.959     |
| 2     | UNKNOWN | 19.56      | 4.04              | 15.5         | 12.9           | 4.041      |
| Total |         |            | 100.00            | 425.6        | 319.0          | 100.000    |

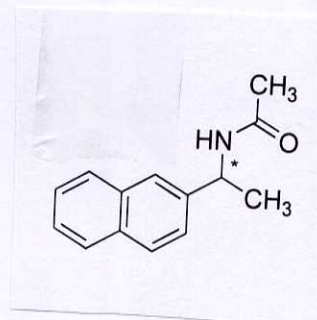

Product 3h

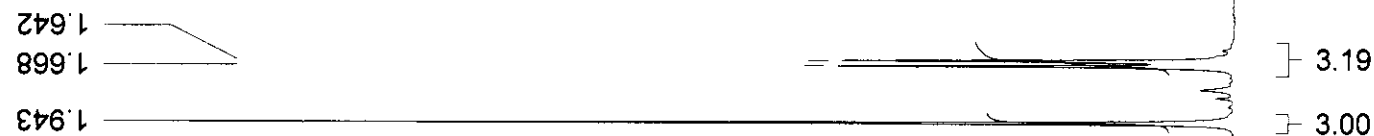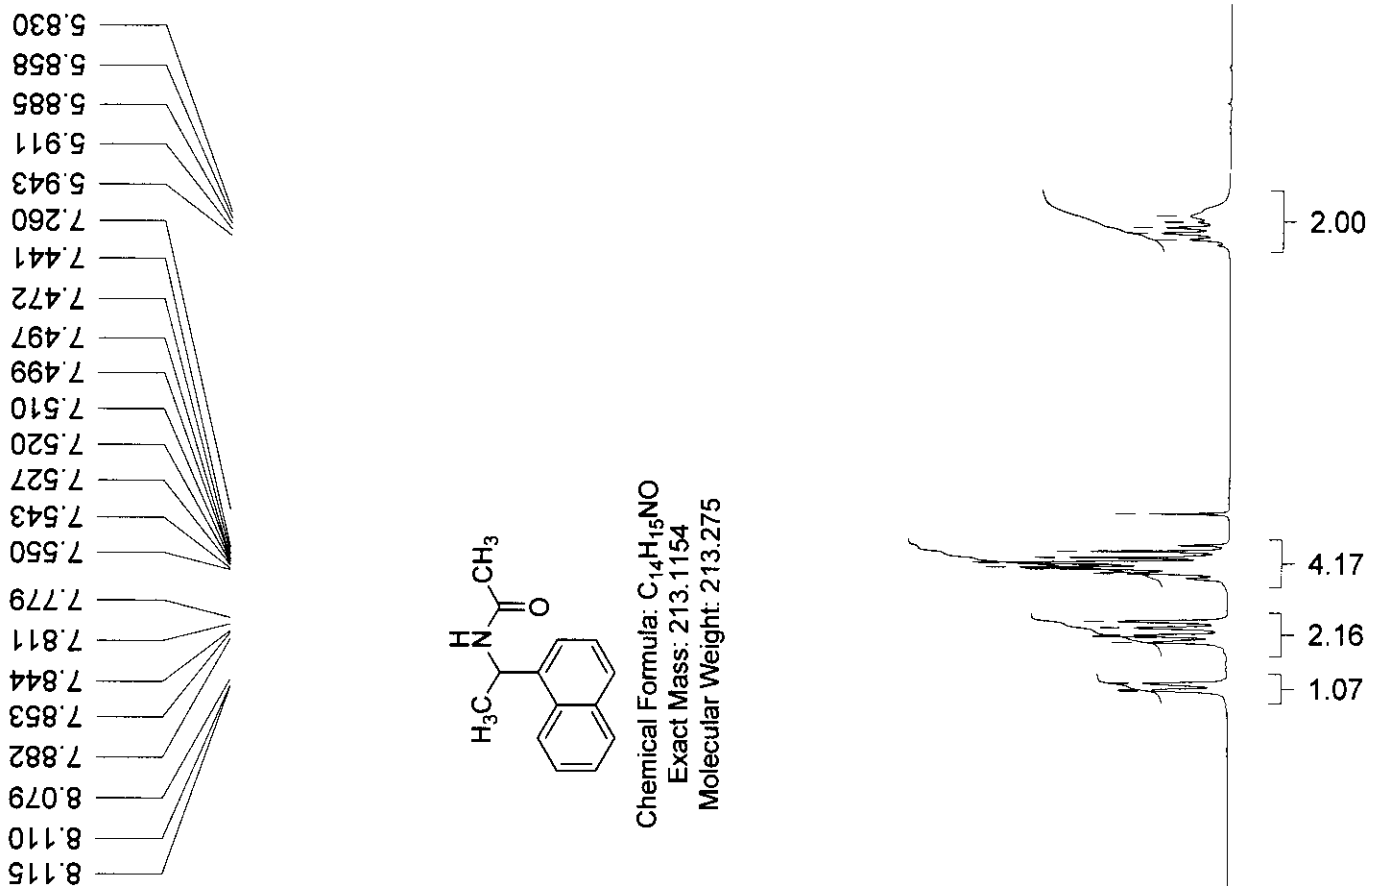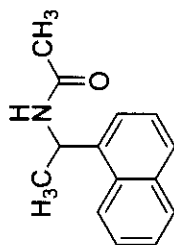

Chemical Formula: C<sub>14</sub>H<sub>15</sub>NO  
Exact Mass: 213.1154  
Molecular Weight: 213.275

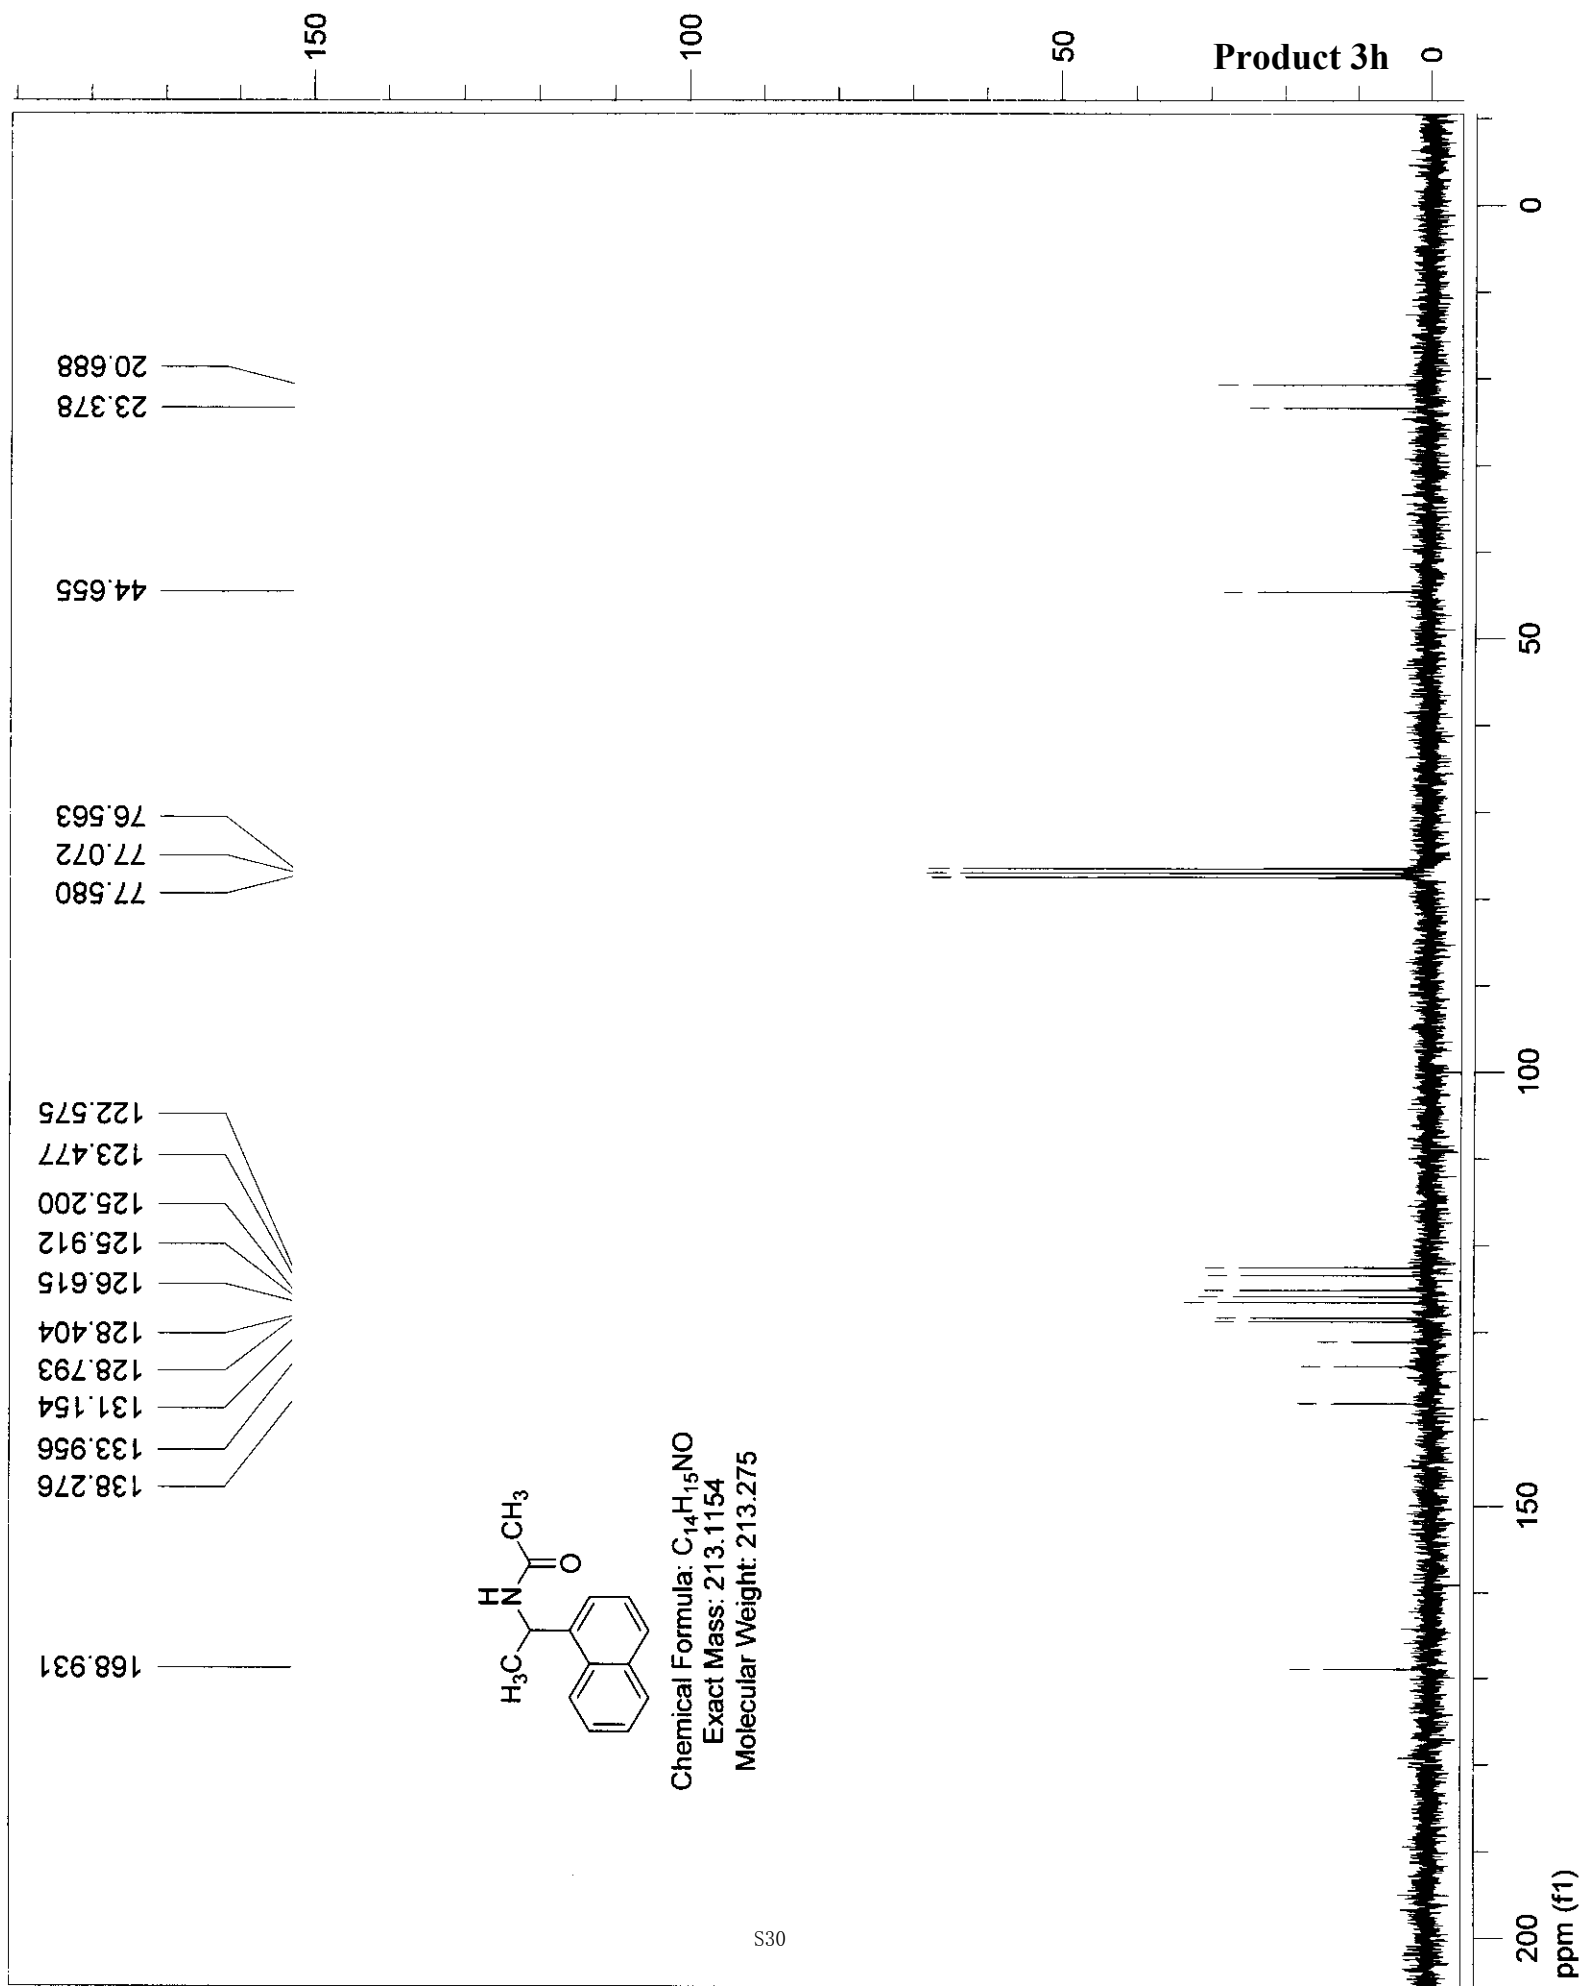



# Chromatogram : LGL3-153(AS90101)1\_channel1

## Product 3h

System : HPLC  
Method : LGL  
User : Gerald Rowland

Acquired : 7/16/2008 10:03:47 AM  
Processed : 7/16/2008 12:11:46 PM  
Printed : 10/30/2008 11:11:26 AM

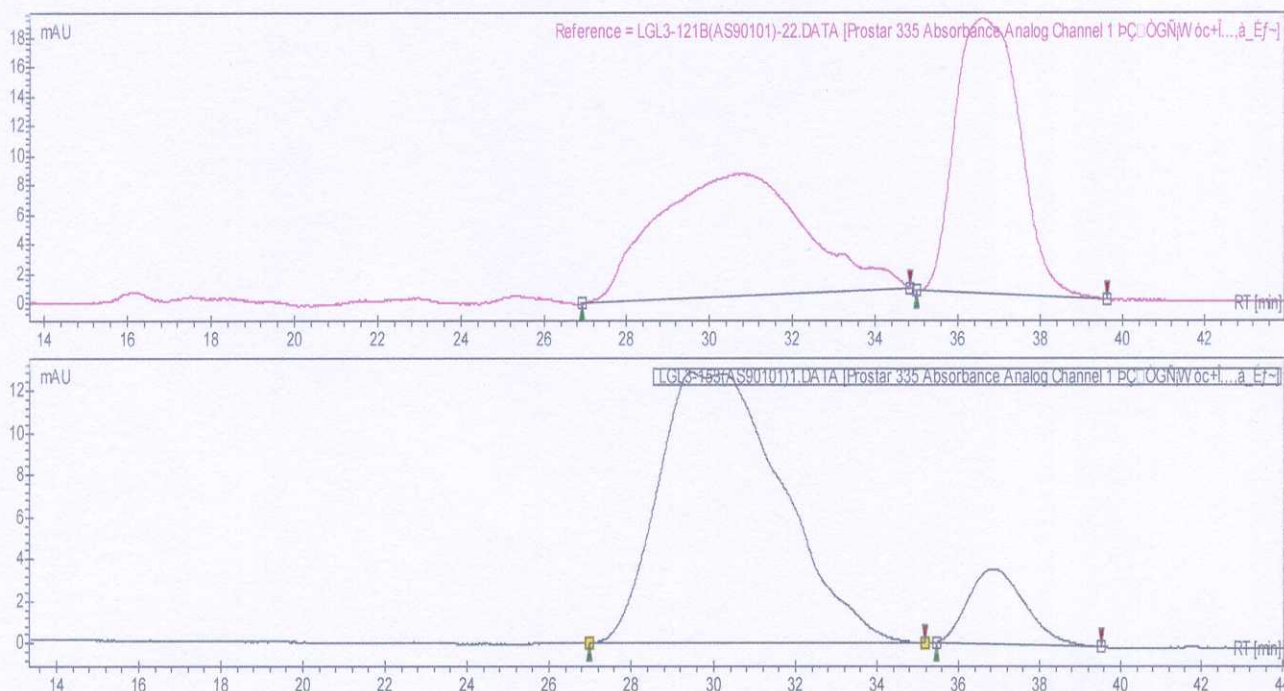

### Peak results :

LGL3-121B(AS90101)-22.D [Prostar 335 Absorbance Analog Channel 1] CC(=O)N[C@H](C)c1ccc2ccccc2c1

| Index | Name    | Time [Min] | Quantity [% Area] | Height [mAU] | Area [mAU.Min] | Area % [%] |
|-------|---------|------------|-------------------|--------------|----------------|------------|
| 2     | UNKNOWN | 30.73      | 50.42             | 8.2          | 34.5           | 50.424     |
| 1     | UNKNOWN | 36.57      | 49.58             | 18.7         | 34.0           | 49.576     |
| Total |         |            | 100.00            | 26.9         | 68.5           | 100.000    |

LGL3-153(AS90101)1.D [Prostar 335 Absorbance Analog Channel 1] CC(=O)N[C@H](C)c1ccc2ccccc2c1

| Index | Name    | Time [Min] | Quantity [% Area] | Height [mAU] | Area [mAU.Min] | Area % [%] |
|-------|---------|------------|-------------------|--------------|----------------|------------|
| 1     | UNKNOWN | 29.43      | 88.79             | 12.9         | 45.2           | 88.790     |
| 2     | UNKNOWN | 36.89      | 11.21             | 3.6          | 5.7            | 11.210     |
| Total |         |            | 100.00            | 16.4         | 50.9           | 100.000    |

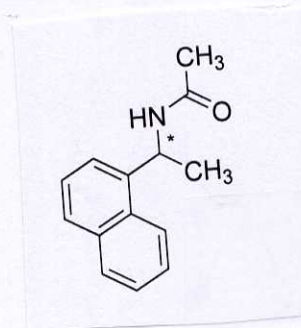

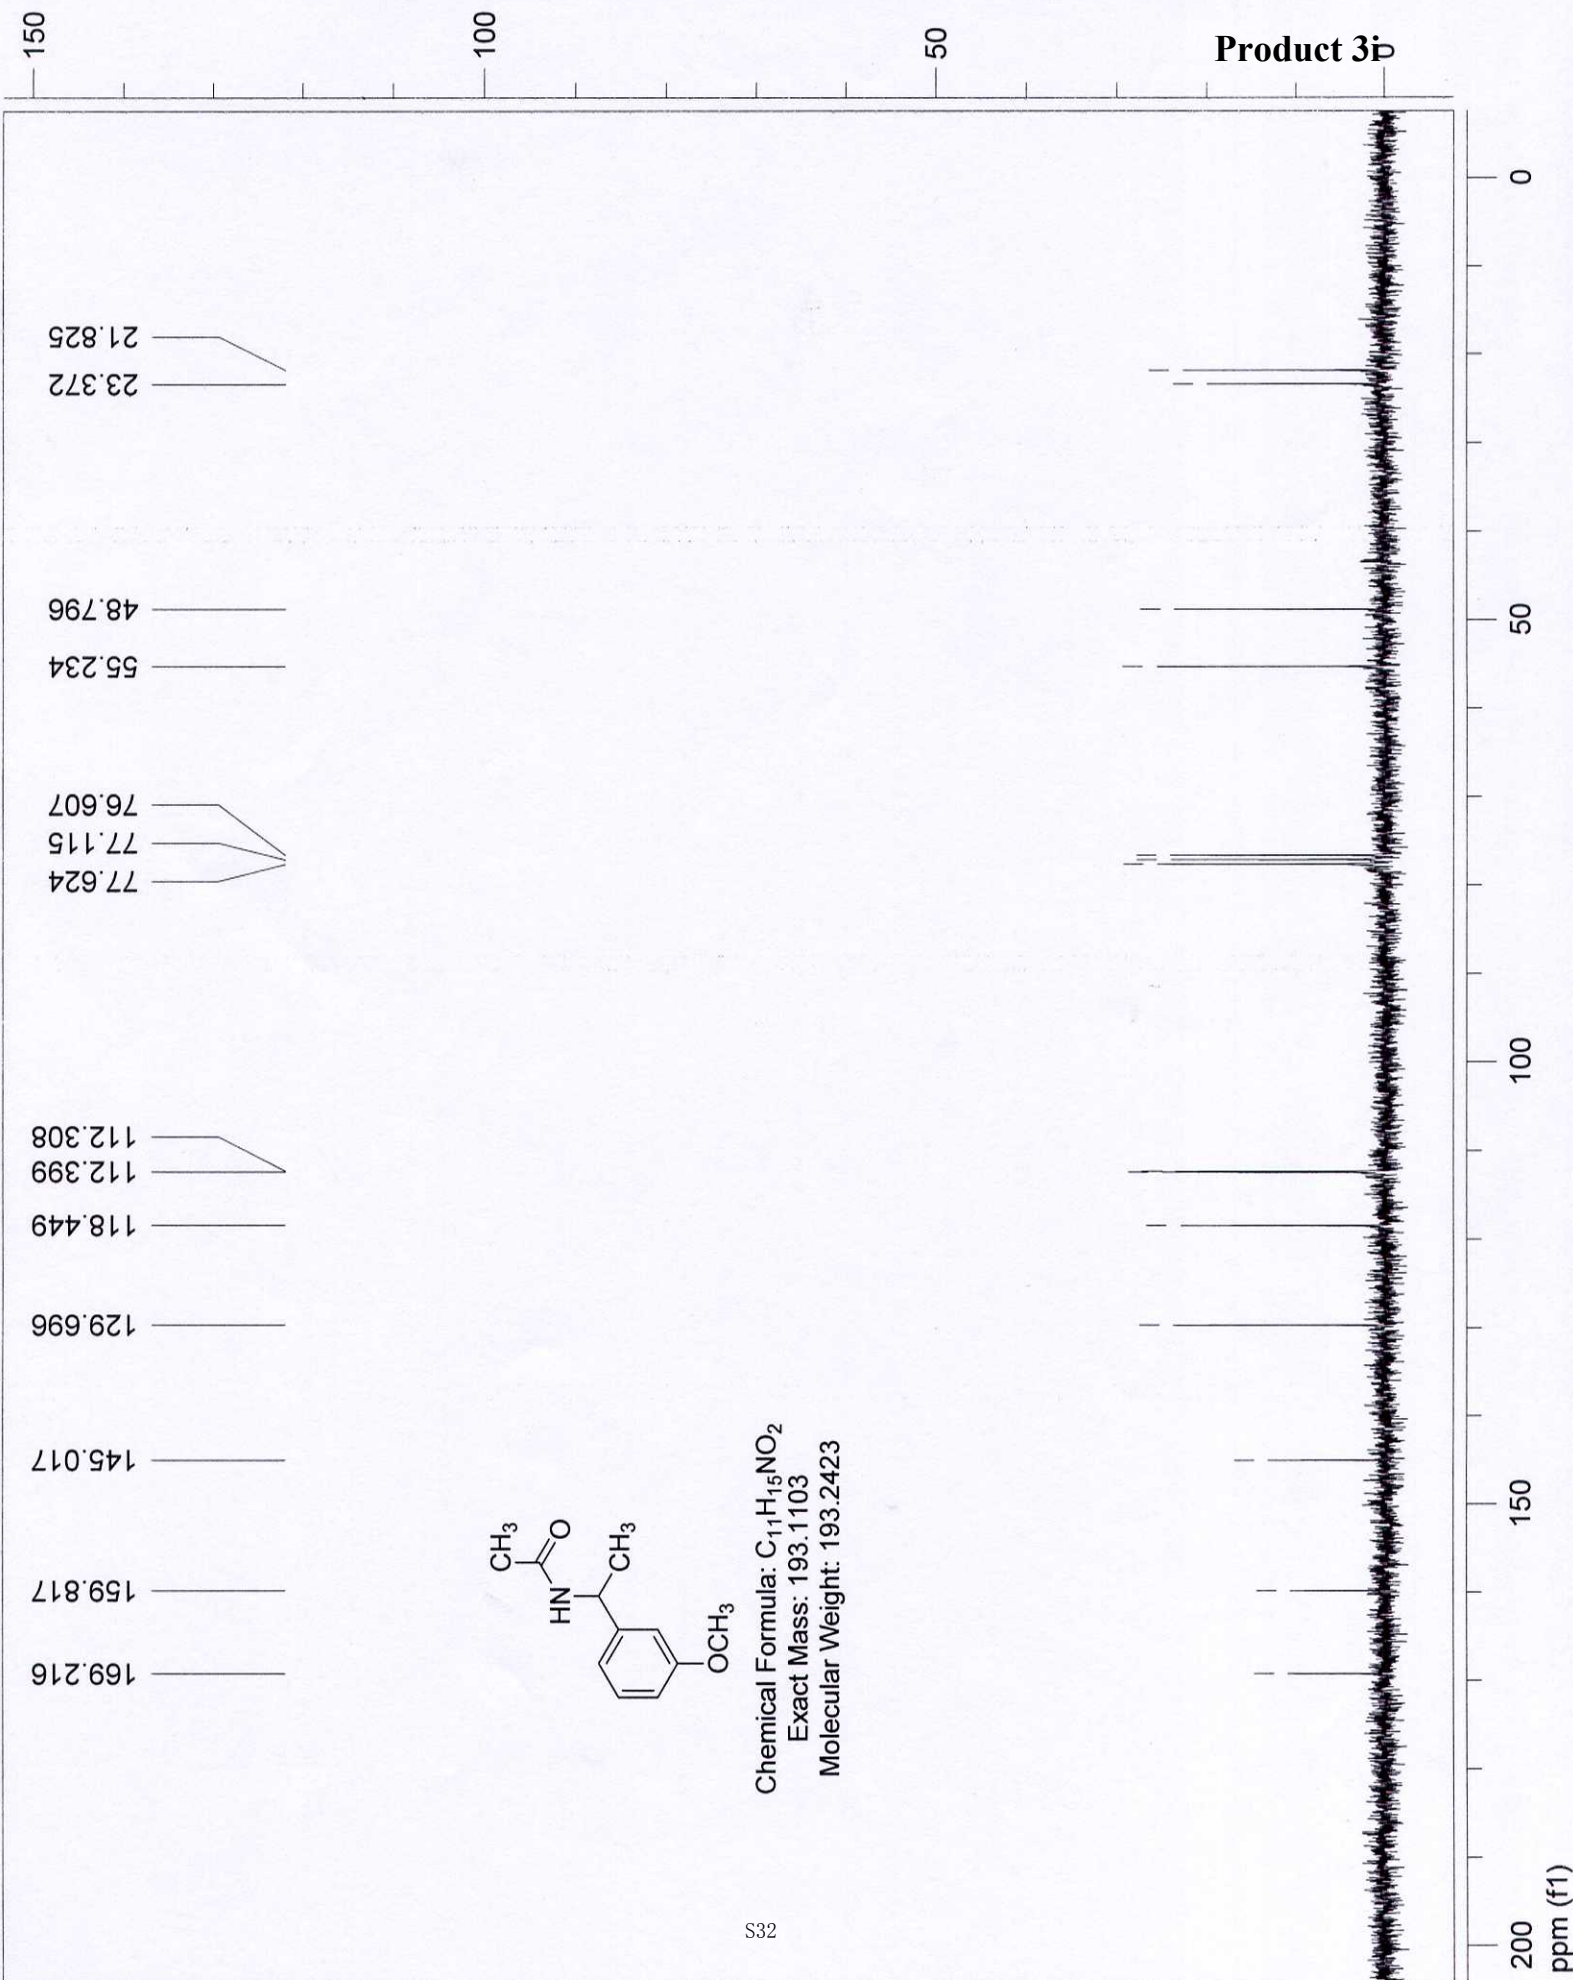



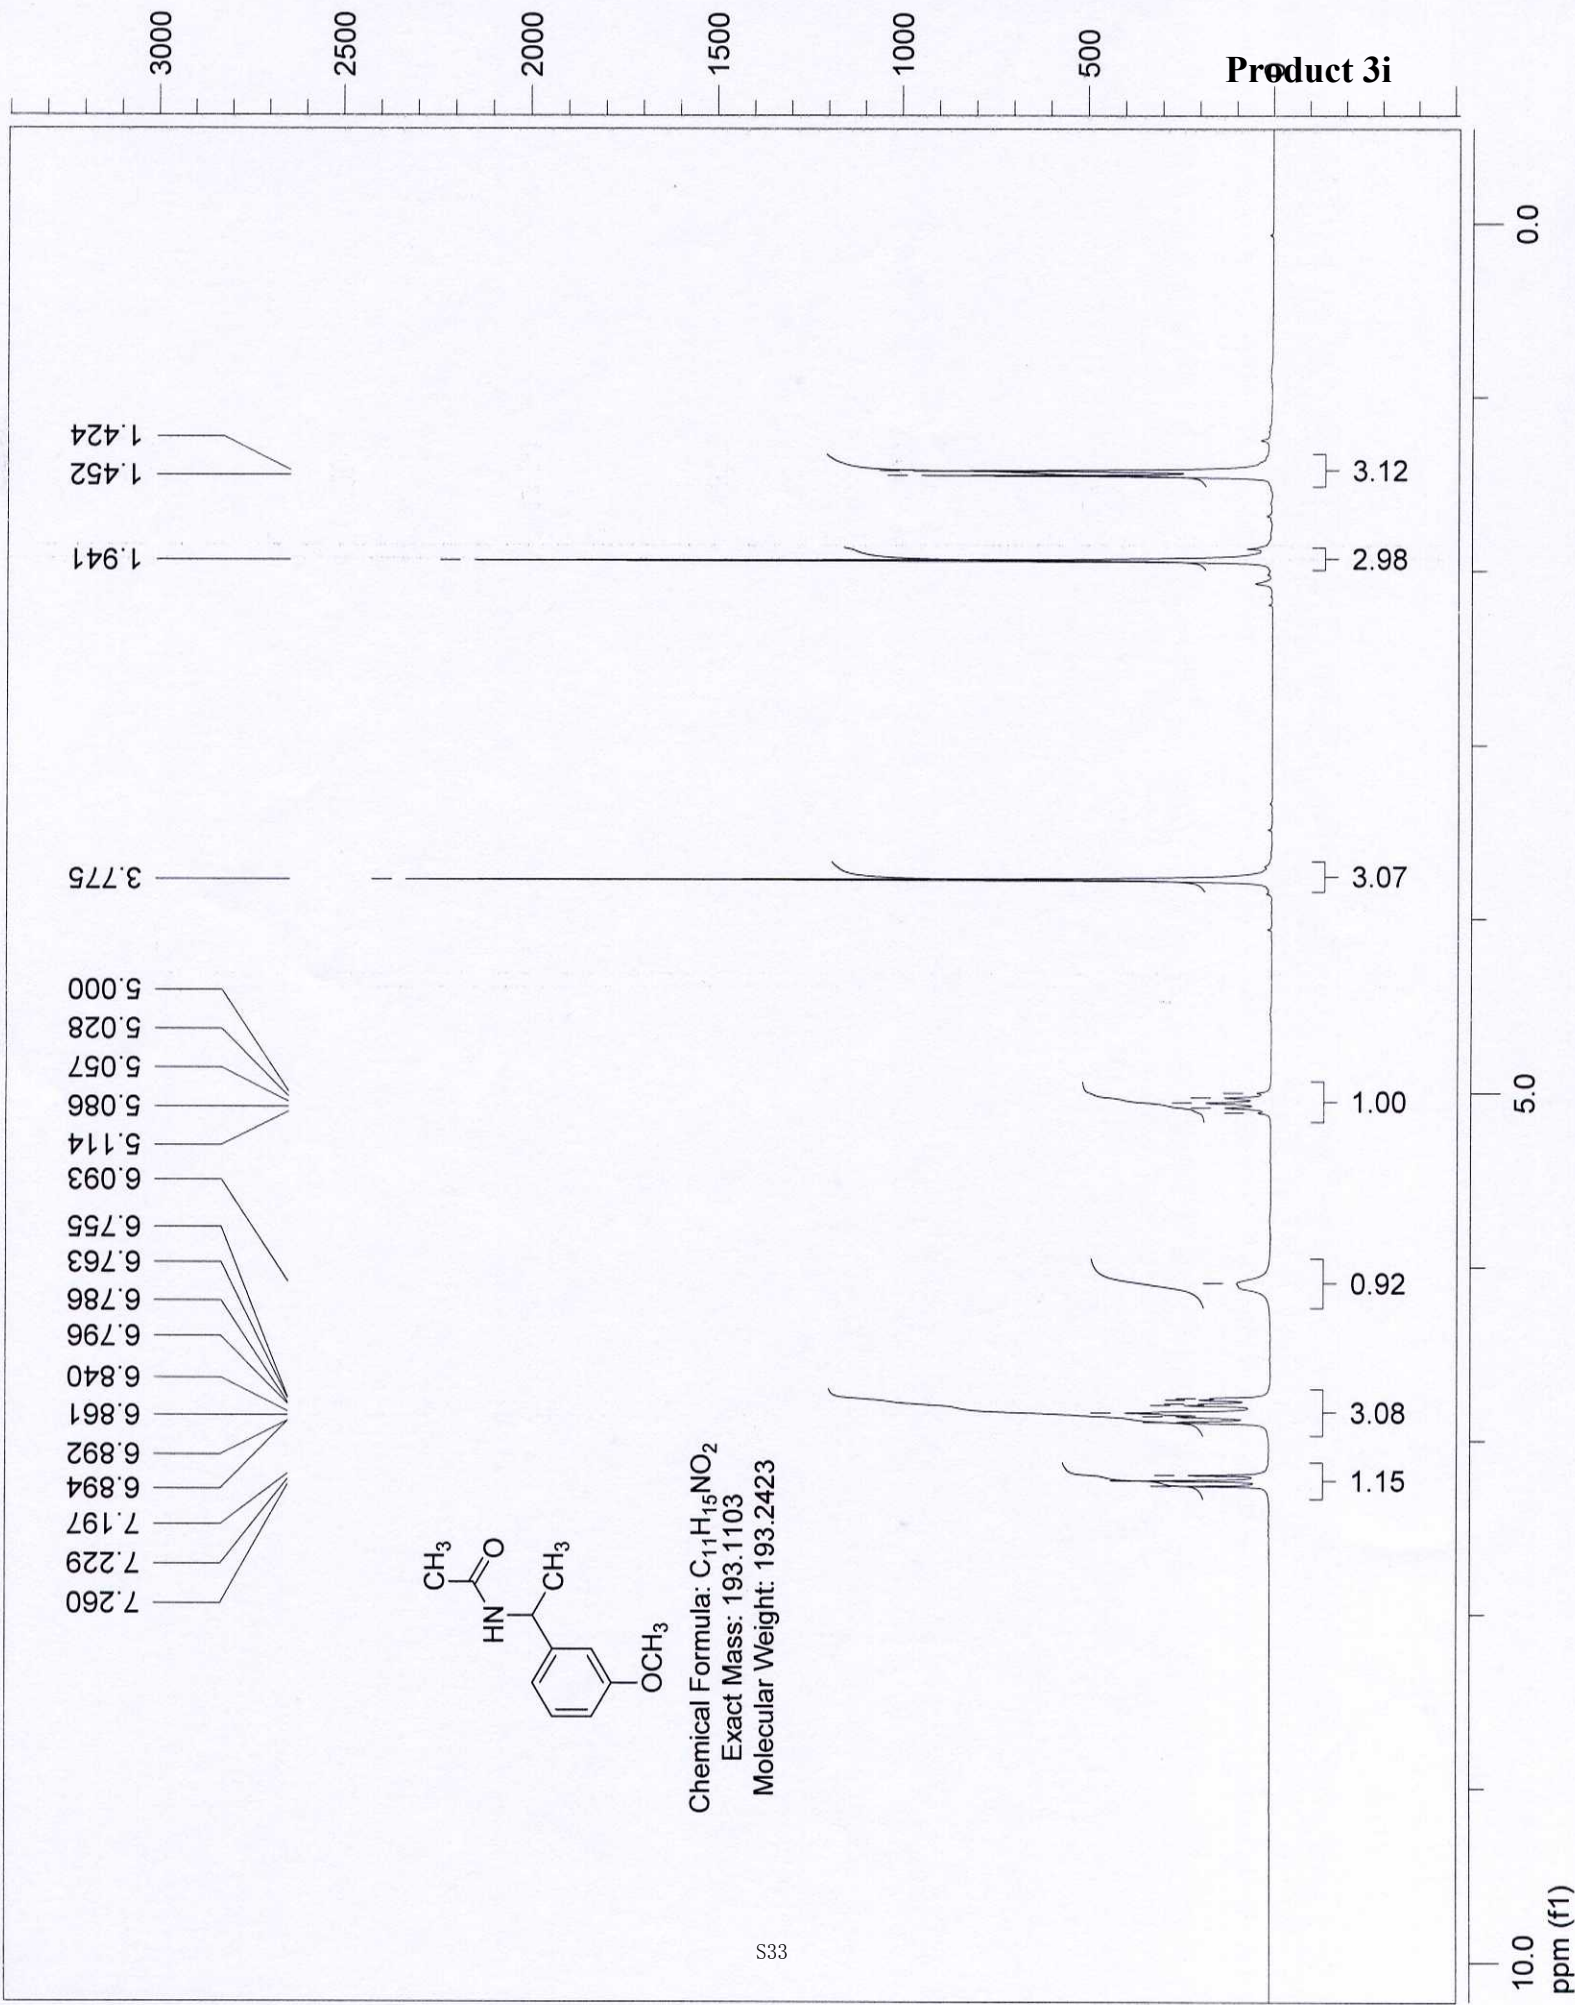

# Chromatogram : LGL3-169(AD95051)-32\_channel1

Product 3i

System : HPLC  
Method : LGL  
User : Gerald Rowland

Acquired : 7/30/2008 2:37:24 PM  
Processed : 8/1/2008 11:03:37 AM  
Printed : 8/1/2008 11:09:51 AM

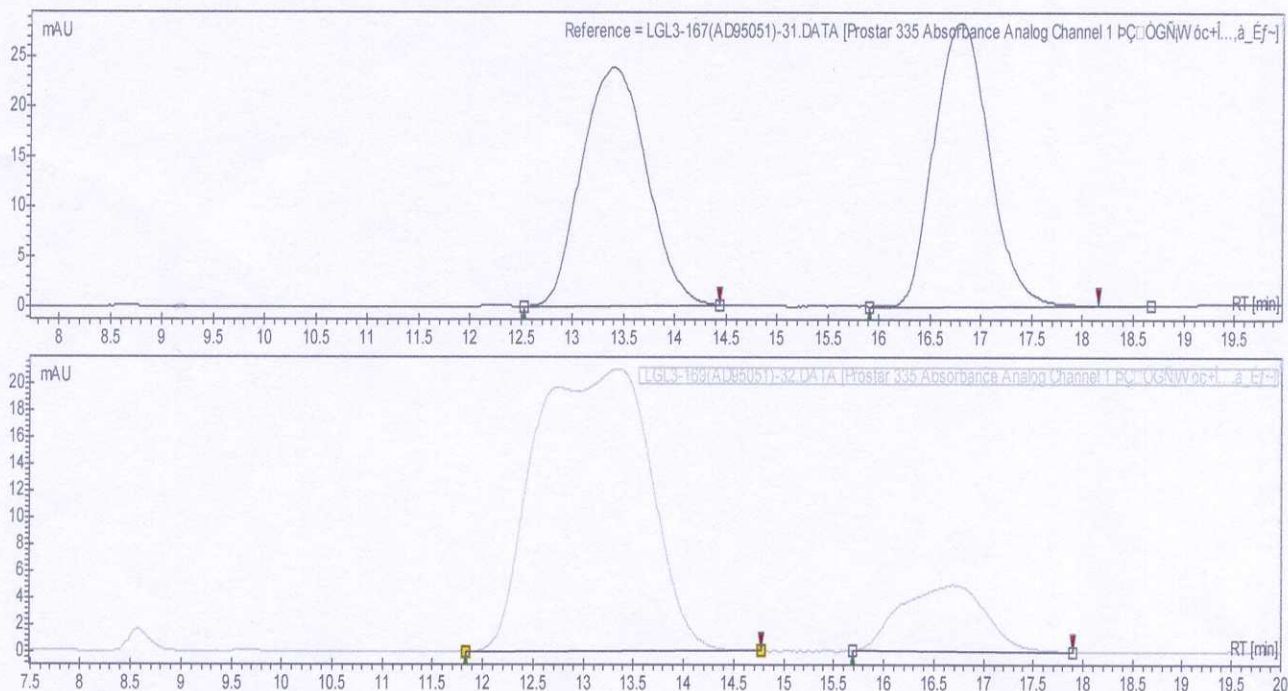

## Peak results :

LGL3-167(AD95051)-31.DAT [Prostar 335 Absorbance Analog Channel 1 PÇ□ÖGÑ;W óc+Î...,à\_Éf~]

| Index | Name    | Time [Min] | Quantity [% Area] | Height [mAU] | Area [mAU.Min] | Area % [%] |
|-------|---------|------------|-------------------|--------------|----------------|------------|
| 1     | UNKNOWN | 13.40      | 49.74             | 23.8         | 17.6           | 49.739     |
| 2     | UNKNOWN | 16.80      | 50.26             | 28.4         | 17.8           | 50.261     |
| Total |         |            | 100.00            | 52.2         | 35.4           | 100.000    |

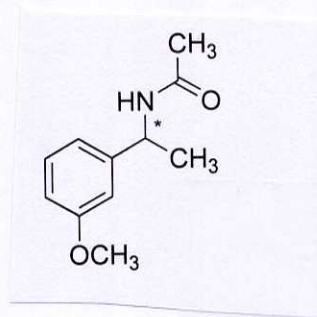

LGL3-169(AD95051)-32.DAT [Prostar 335 Absorbance Analog Channel 1 PÇ□ÖGÑ;W óc+Î...,à\_Éf~]

| Index | Name    | Time [Min] | Quantity [% Area] | Height [mAU] | Area [mAU.Min] | Area % [%] |
|-------|---------|------------|-------------------|--------------|----------------|------------|
| 1     | UNKNOWN | 13.33      | 85.35             | 21.0         | 28.1           | 85.346     |
| 2     | UNKNOWN | 16.65      | 14.65             | 4.9          | 4.8            | 14.654     |
| Total |         |            | 100.00            | 25.9         | 32.9           | 100.000    |



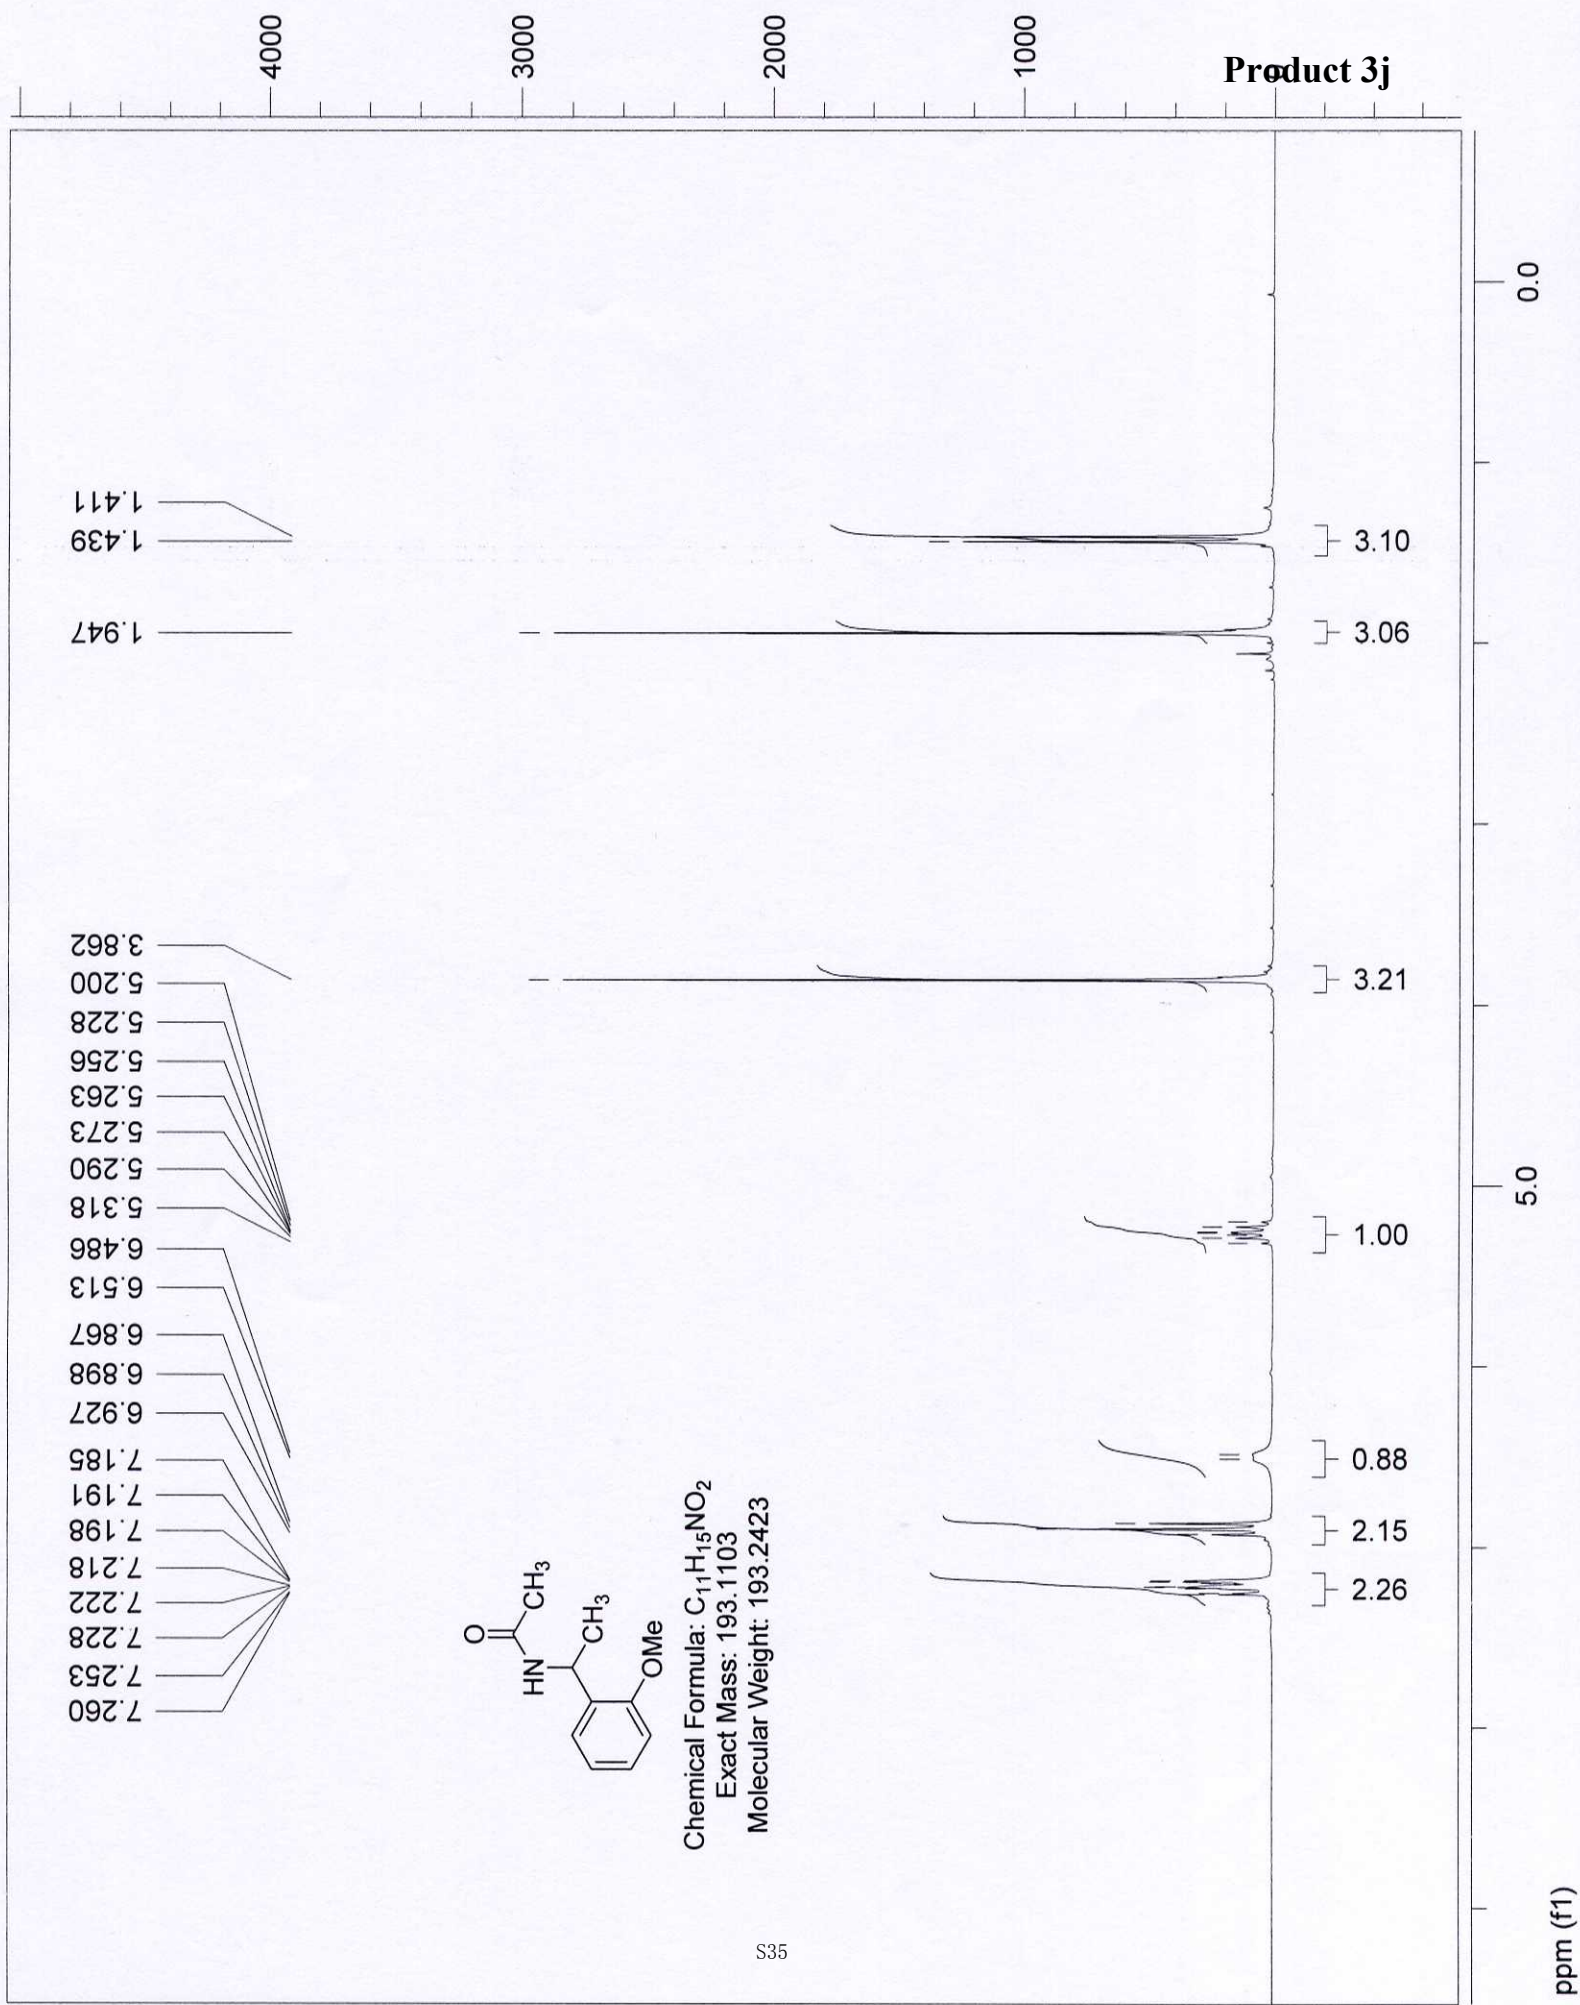

Product 3j 0

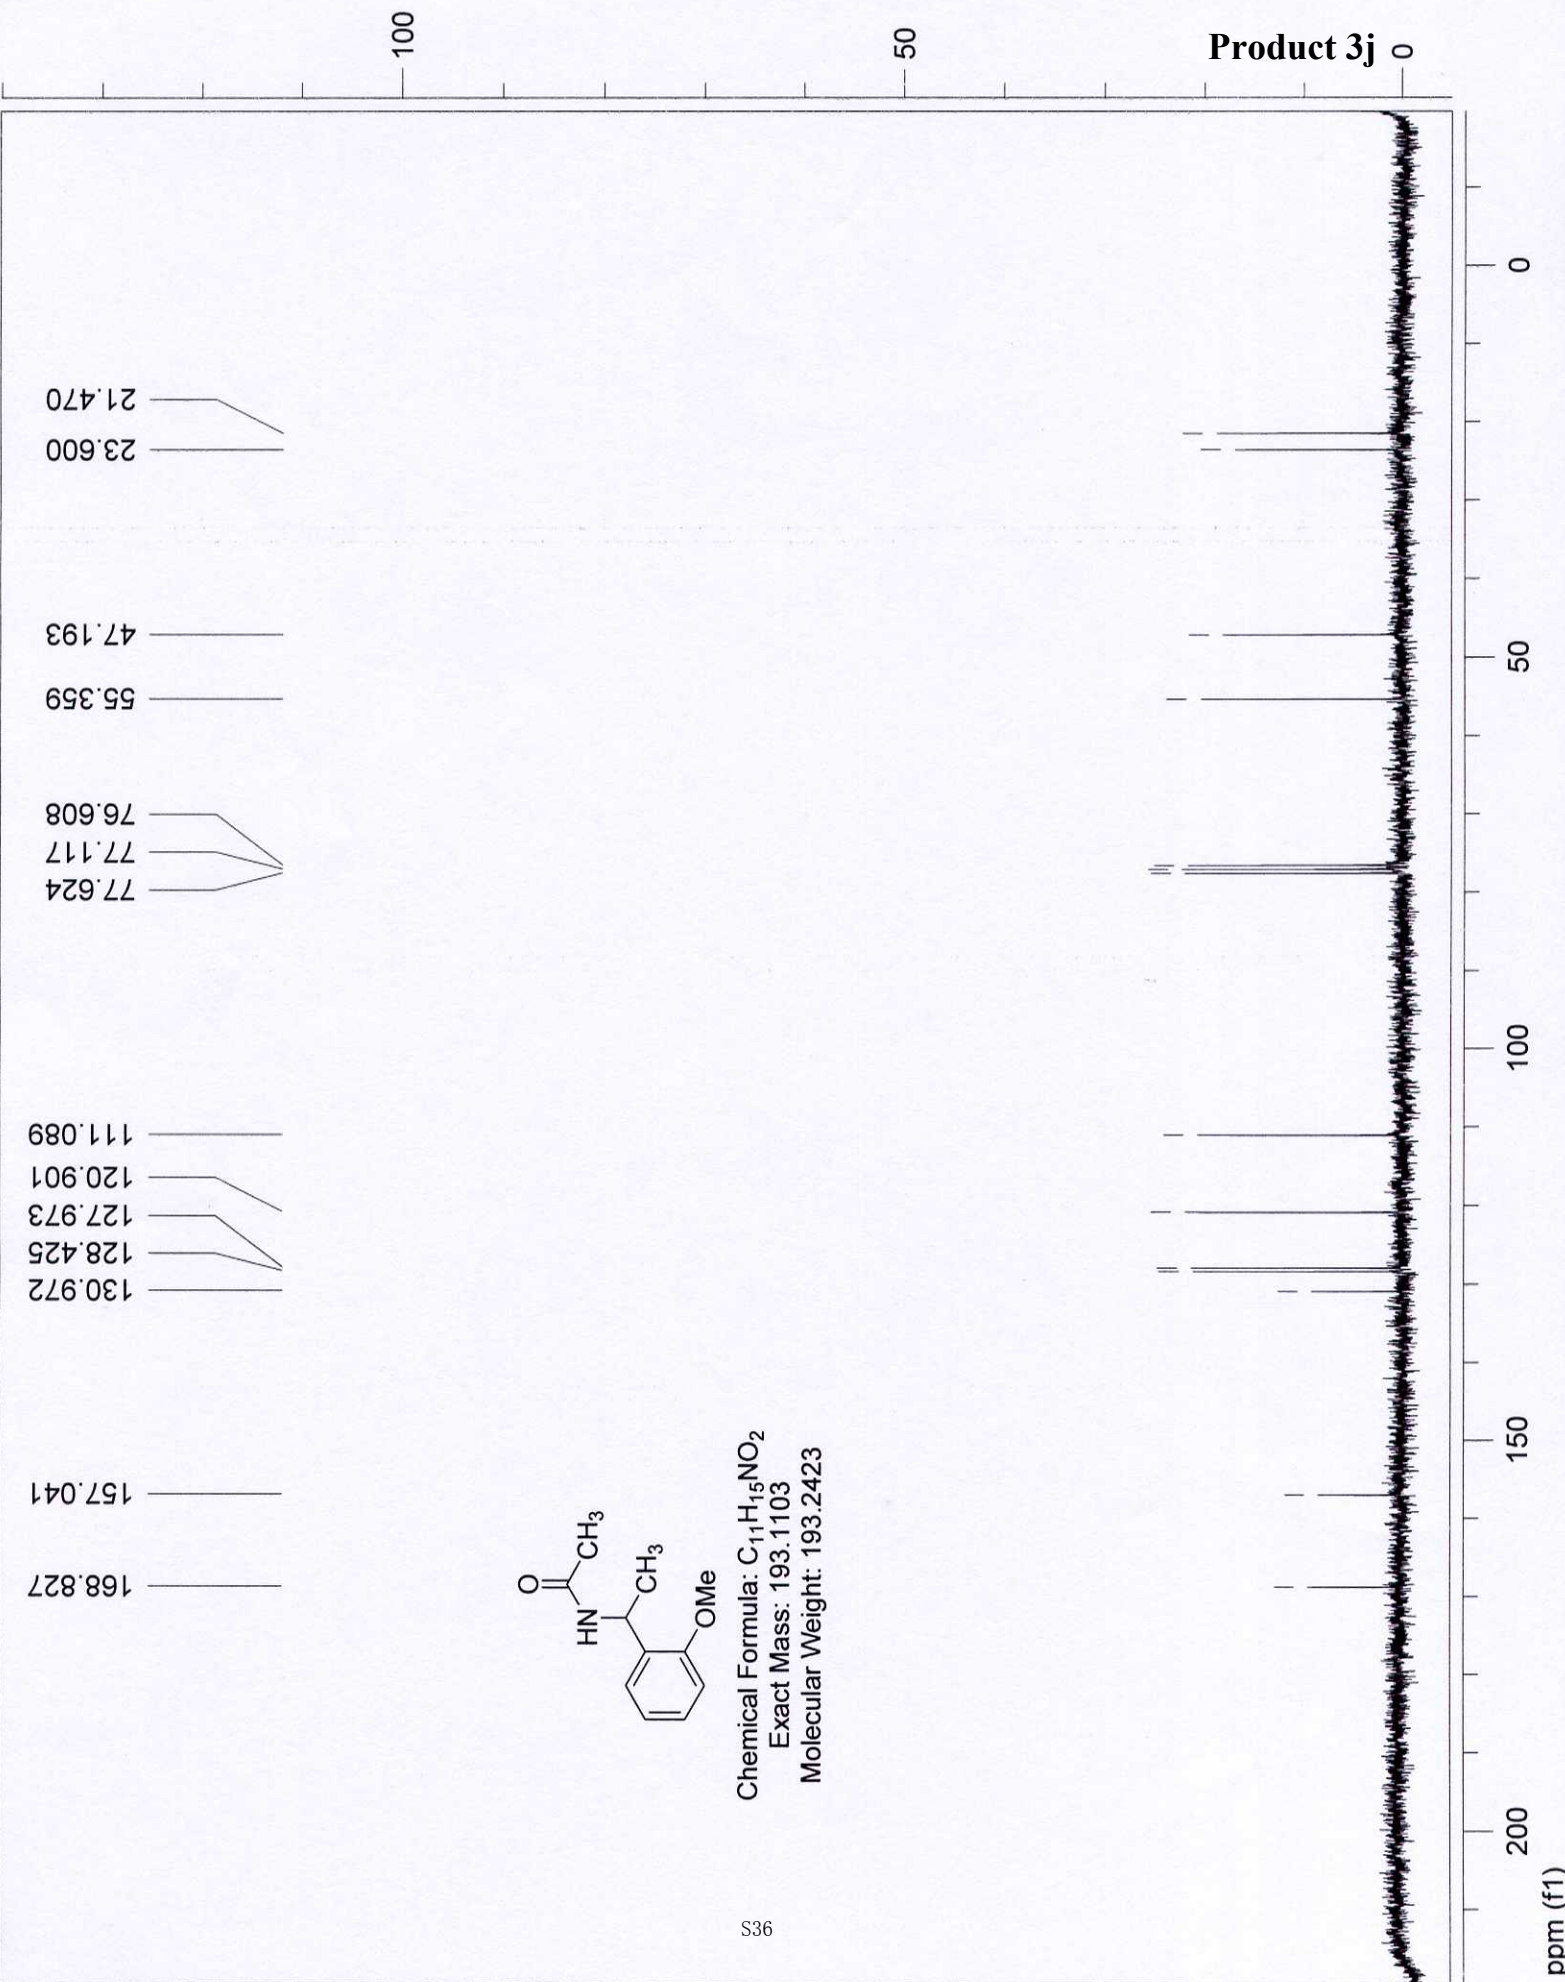



# Chromatogram : LGL3-158(AD95051)1\_channel1

Product 3j

System : HPLC  
Method : LGL  
User : Gerald Rowland

Acquired : 7/16/2008 2:39:21 PM  
Processed : 7/16/2008 3:01:45 PM  
Printed : 10/30/2008 4:20:21 PM

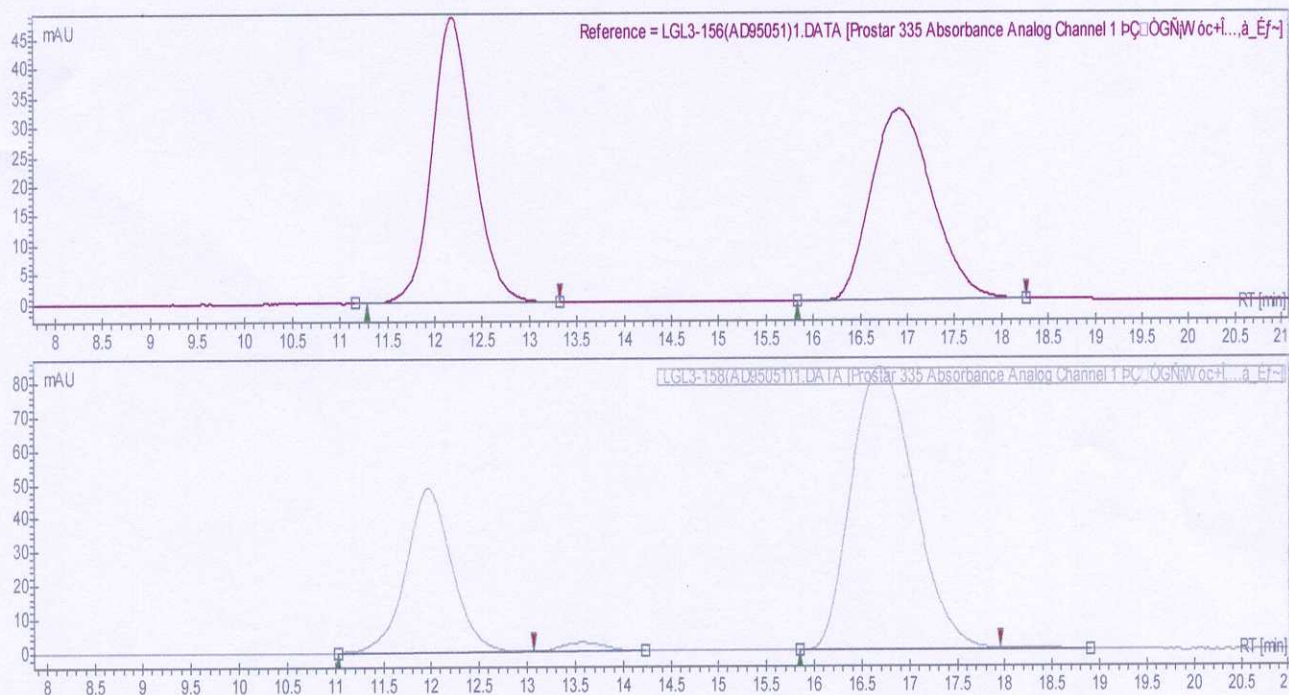

## Peak results :

LGL3-156(AD95051)1.D [Prostar 335 Absorbance Analog Channel 1]

| Index | Name    | Time [Min] | Quantity [% Area] | Height [mAU] | Area [mAU.Min] | Area % [%] |
|-------|---------|------------|-------------------|--------------|----------------|------------|
| 1     | UNKNOWN | 12.17      | 50.11             | 48.5         | 24.5           | 50.109     |
| 2     | UNKNOWN | 16.92      | 49.89             | 32.3         | 24.4           | 49.891     |
| Total |         |            | 100.00            | 80.8         | 48.9           | 100.000    |

LGL3-158(AD95051)1.D [Prostar 335 Absorbance Analog Channel 1]

| Index | Name    | Time [Min] | Quantity [% Area] | Height [mAU] | Area [mAU.Min] | Area % [%] |
|-------|---------|------------|-------------------|--------------|----------------|------------|
| 1     | UNKNOWN | 11.97      | 29.45             | 48.7         | 26.9           | 29.450     |
| 2     | UNKNOWN | 16.69      | 70.55             | 84.1         | 64.5           | 70.550     |
| Total |         |            | 100.00            | 132.8        | 91.5           | 100.000    |

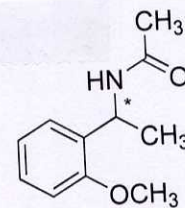

Supplement: Supplementary file 1 [file 4571719]
